# Supplementary material for: Prevalence of near-death experiences in people with and without REM sleep intrusion
Source: PeerJ. 2019 Aug 27;7:e7585. doi: 10.7717/peerj.7585 (PMC6716500; doi:10.7717/peerj.7585)
Supplement: Data S1 [file peerj-07-7585-s001.xlsx]

## Sheet: Sheet
Respondent ID	Collector ID	Start Date	End Date	IP Address	Email Address	First Name	Last Name	Custom Data 1	Please enter your Prolific ID:	How old are you?	Please indicate your gender			Do you get headaches that are NOT caused by a head injury, hangover, or an illness such as the cold or the flu?		Do your headaches ever last more than four hours?		Have you ever had visual disturbances around the time of your headache? For example, have you ever seen any spots, stars, lines, flashing lights, zigzag lines, or heat waves?		Around the time of your headaches, have you ever had:				Near-death experiences can be defined as any conscious experience, including emotional, self-related, spiritual and/or mystical experiences, occurring in a person close to death or in situations of intense physical or emotional danger. In plain language - near-death experiences are exceptional experiences that you may have when you are dying or feel as if you were dying.Have you ever had such a n…		Was your near-death experience associated with a true life-threatening event or an event that was not life-threatening but felt so?		Did time seem to speed up or slow down?			Were your thoughts speeded up?			Did scenes from your past come back to you?			Did you suddenly seem to understand everything?			Did you have a feeling of peace or pleasantness?				Did you have a feeling of joy?			Did you feel a sense of harmony or unity with the universe?
									Open-Ended Response	Open-Ended Response	Female	Male	Other	Yes	No	Yes	No	Yes	No	Numbness or tingling of your body or face	Weakness of your arm leg, face, or half of your body	Difficulty speaking	None of the above	Yes	No	Truly life-threatening	Not truly life-threatening, but it felt like it	No	Time seemed to go faster or slower than usual	Everything seemed to be happening at once; or time stopped or lost all meaning	No	Faster than usual	Incredibly faster	No	I remembered many past events	My past flashed before me, out of my control	No	Everything about myself or others	Everything about the universe	No, it was unpleasant	No, it was a neutral	I felt relief and calmness	I felt incredible peace or pleasantness	No	Happiness	Incredible joy	No	I felt no longer in conflict with nature	I felt united or one with the world
10507843762	225134152	2019-02-04 17:01:38	2019-02-04 17:03:31	95.74.110.163					xxxxxxxx	25	Female			Yes		Yes		Yes					None of the above		No
10507843411	225134152	2019-02-04 17:01:08	2019-02-04 17:06:20	94.197.121.243					xxxxxxxx	26	Female				No									Yes		Truly life-threatening				Everything seemed to be happening at once; or time stopped or lost all meaning		Faster than usual		No			No			No, it was unpleasant				No			No
10507843353	225134152	2019-02-04 17:00:41	2019-02-04 17:02:34	129.161.77.131					xxxxxxxx	19		Male			No										No
10507842483	225134152	2019-02-04 17:00:36	2019-02-04 17:02:23	77.254.73.50					xxxxxxxx	18		Male			No										No
10507842444	225134152	2019-02-04 17:00:57	2019-02-04 17:03:49	94.193.54.252					xxxxxxxx	35	Female			Yes			No							Yes			Not truly life-threatening, but it felt like it		Time seemed to go faster or slower than usual			Faster than usual		No			No				No, it was a neutral			No			No
10507842415	225134152	2019-02-04 17:00:52	2019-02-04 17:02:04	73.72.245.1					xxxxxxxx	18	Female			Yes			No								No
10507842241	225134152	2019-02-04 17:01:03	2019-02-04 17:02:08	91.51.221.228					xxxxxxxx	31		Male			No										No
10507833333	225134152	2019-02-04 16:57:20	2019-02-04 16:59:38	73.24.39.42					xxxxxxxx	42		Male		Yes		Yes			No				None of the above	Yes		Truly life-threatening		No			No			No			No			No, it was unpleasant				No			No
10507826211	225134152	2019-02-04 16:54:22	2019-02-04 16:55:03	151.70.246.70					xxxxxxxx	31		Male			No										No
10507823882	225134152	2019-02-04 16:53:14	2019-02-04 16:55:38	89.155.170.224					xxxxxxxx	22		Male			No									Yes			Not truly life-threatening, but it felt like it			Everything seemed to be happening at once; or time stopped or lost all meaning	No			No			No			No, it was unpleasant				No			No
10507822166	225134152	2019-02-04 16:52:33	2019-02-04 16:53:46	88.157.147.186					xxxxxxxx	23		Male		Yes			No								No
10507815344	225134152	2019-02-04 16:48:56	2019-02-04 16:52:30	82.132.243.2					xxxxxxxx	50	Female			Yes		Yes		Yes					None of the above		No
10507814912	225134152	2019-02-04 16:49:42	2019-02-04 16:54:25	91.142.104.37					xxxxxxxx	18		Male		Yes			No							Yes			Not truly life-threatening, but it felt like it			Everything seemed to be happening at once; or time stopped or lost all meaning			Incredibly faster		I remembered many past events		No			No, it was unpleasant				No			No
10507814693	225134152	2019-02-04 16:49:03	2019-02-04 16:51:28	79.167.205.15					xxxxxxxx	53	Female				No										No
10507814503	225134152	2019-02-04 16:49:25	2019-02-04 16:51:56	109.67.65.123					xxxxxxxx	29	Female				No									Yes		Truly life-threatening		No				Faster than usual			I remembered many past events			Everything about myself or others		No, it was unpleasant				No			No
10507814413	225134152	2019-02-04 16:48:13	2019-02-04 16:51:17	86.139.44.38					xxxxxxxx	49	Female			Yes			No								No
10507814274	225134152	2019-02-04 16:49:00	2019-02-04 16:51:41	5.144.202.69					xxxxxxxx	21		Male		Yes			No								No
10507814218	225134152	2019-02-04 16:47:33	2019-02-04 16:51:37	77.228.120.171					xxxxxxxx	54	Female			Yes			No								No
10507813744	225134152	2019-02-04 16:48:15	2019-02-04 16:54:38	158.148.167.17					xxxxxxxx	41	Female				No									Yes			Not truly life-threatening, but it felt like it		Time seemed to go faster or slower than usual		No				I remembered many past events			Everything about myself or others			No, it was a neutral			No			No
10507813634	225134152	2019-02-04 16:48:52	2019-02-04 16:50:51	78.147.195.173					xxxxxxxx	66	Female				No										No
10507813502	225134152	2019-02-04 16:48:49	2019-02-04 16:52:15	217.129.179.2					xxxxxxxx	31		Male			No									Yes			Not truly life-threatening, but it felt like it			Everything seemed to be happening at once; or time stopped or lost all meaning		Faster than usual			I remembered many past events		No			No, it was unpleasant				No					I felt united or one with the world
10507813388	225134152	2019-02-04 16:48:53	2019-02-04 16:49:27	88.98.95.183					xxxxxxxx	35	Female				No										No
10507813328	225134152	2019-02-04 16:48:54	2019-02-04 16:50:33	109.181.33.41					xxxxxxxx	25	Female			Yes		Yes		Yes					None of the above	Yes			Not truly life-threatening, but it felt like it		Time seemed to go faster or slower than usual			Faster than usual		No			No			No, it was unpleasant				No			No
10507813319	225134152	2019-02-04 16:48:48	2019-02-04 16:49:56	82.13.186.155					xxxxxxxx	22			Other		No										No
10507813043	225134152	2019-02-04 16:48:52	2019-02-04 16:50:05	86.182.128.173					xxxxxxxx	35	Female			Yes		Yes		Yes					None of the above		No
10507812747	225134152	2019-02-04 16:48:42	2019-02-04 16:49:12	72.141.144.56					xxxxxxxx	36		Male		Yes			No								No
10507812701	225134152	2019-02-04 16:48:26	2019-02-04 16:49:57	87.196.80.222					xxxxxxxx	25	Female			Yes		Yes			No				None of the above		No
10507812699	225134152	2019-02-04 16:48:39	2019-02-04 16:49:24	95.147.28.172					xxxxxxxx	35	Female			Yes		Yes		Yes		Numbness or tingling of your body or face					No
10507812599	225134152	2019-02-04 16:48:30	2019-02-04 16:49:28	82.43.251.106					xxxxxxxx	23	Female				No										No
10507812560	225134152	2019-02-04 16:48:13	2019-02-04 16:50:28	217.67.63.107					xxxxxxxx	49	Female			Yes		Yes			No				None of the above		No
10507812529	225134152	2019-02-04 16:48:24	2019-02-04 16:49:02	79.173.42.69					xxxxxxxx	20		Male			No										No
10507812525	225134152	2019-02-04 16:48:30	2019-02-04 16:49:57	82.61.51.153					xxxxxxxx	38	Female				No										No
10507812509	225134152	2019-02-04 16:48:22	2019-02-04 16:50:01	99.242.101.22					xxxxxxxx	38	Female			Yes		Yes			No				None of the above		No
10507812454	225134152	2019-02-04 16:48:38	2019-02-04 16:49:14	2.122.5.22					xxxxxxxx	32	Female			Yes		Yes			No			Difficulty speaking			No
10507812311	225134152	2019-02-04 16:48:29	2019-02-04 16:51:11	47.54.222.187					xxxxxxxx	26		Male		Yes		Yes		Yes					None of the above	Yes			Not truly life-threatening, but it felt like it			Everything seemed to be happening at once; or time stopped or lost all meaning			Incredibly faster	No				Everything about myself or others		No, it was unpleasant				No			No
10507812217	225134152	2019-02-04 16:48:24	2019-02-04 16:50:22	79.131.83.104					xxxxxxxx	30		Male		Yes		Yes			No				None of the above		No
10507812175	225134152	2019-02-04 16:48:10	2019-02-04 16:49:51	94.61.205.11					xxxxxxxx	19		Male		Yes			No								No
10507812118	225134152	2019-02-04 16:48:12	2019-02-04 16:49:50	85.244.99.167					xxxxxxxx	21		Male		Yes		Yes		Yes					None of the above		No
10507812075	225134152	2019-02-04 16:48:01	2019-02-04 16:50:32	151.37.20.60					xxxxxxxx	23	Female				No										No
10507811991	225134152	2019-02-04 16:48:21	2019-02-04 16:50:39	77.54.210.209					xxxxxxxx	30		Male			No										No
10507811798	225134152	2019-02-04 16:48:16	2019-02-04 16:49:39	80.4.163.110					xxxxxxxx	30		Male		Yes			No								No
10507811744	225134152	2019-02-04 16:48:09	2019-02-04 16:49:26	194.150.65.182					xxxxxxxx	30	Female				No										No
10507811722	225134152	2019-02-04 16:48:09	2019-02-04 16:54:03	109.67.216.91					xxxxxxxx	18		Male			No										No
10507811697	225134152	2019-02-04 16:48:08	2019-02-04 16:49:27	87.112.164.184					xxxxxxxx	47	Female			Yes		Yes		Yes					None of the above		No
10507811617	225134152	2019-02-04 16:48:08	2019-02-04 16:48:48	151.230.155.229					xxxxxxxx	52	Female				No										No
10507811598	225134152	2019-02-04 16:48:08	2019-02-04 16:49:39	83.11.51.147					xxxxxxxx	20		Male		Yes		Yes			No				None of the above		No
10507811586	225134152	2019-02-04 16:48:10	2019-02-04 16:48:37	148.63.255.149					xxxxxxxx	19	Female				No										No
10507811506	225134152	2019-02-04 16:48:05	2019-02-04 16:49:21	5.81.11.39					xxxxxxxx	19		Male		Yes			No								No
10507811488	225134152	2019-02-04 16:48:04	2019-02-04 16:49:55	2.82.85.36					xxxxxxxx	23		Male		Yes		Yes			No		Weakness of your arm leg, face, or half of your body				No
10507811431	225134152	2019-02-04 16:47:58	2019-02-04 16:51:24	90.254.105.231					xxxxxxxx	29	Female			Yes		Yes		Yes					None of the above	Yes			Not truly life-threatening, but it felt like it			Everything seemed to be happening at once; or time stopped or lost all meaning		Faster than usual			I remembered many past events		No			No, it was unpleasant				No			No
10507811427	225134152	2019-02-04 16:47:05	2019-02-04 16:54:28	2.216.123.214					xxxxxxxx	30	Female			Yes			No							Yes		Truly life-threatening				Everything seemed to be happening at once; or time stopped or lost all meaning		Faster than usual		No				Everything about myself or others			No, it was a neutral			No					I felt united or one with the world
10507811286	225134152	2019-02-04 16:47:51	2019-02-04 16:48:46	109.148.36.45					xxxxxxxx	41	Female			Yes			No								No
10507811050	225134152	2019-02-04 16:47:52	2019-02-04 16:48:25	192.38.33.23					xxxxxxxx	34	Female				No										No
10507810936	225134152	2019-02-04 16:47:42	2019-02-04 16:48:48	205.200.213.126					xxxxxxxx	43		Male		Yes		Yes		Yes					None of the above		No
10507810886	225134152	2019-02-04 16:47:48	2019-02-04 16:52:11	87.13.148.84					xxxxxxxx	33		Male		Yes		Yes			No				None of the above	Yes			Not truly life-threatening, but it felt like it			Everything seemed to be happening at once; or time stopped or lost all meaning	No			No			No						I felt incredible peace or pleasantness			Incredible joy			I felt united or one with the world
10507810781	225134152	2019-02-04 16:47:13	2019-02-04 16:53:45	89.79.121.61					xxxxxxxx	35	Female			Yes		Yes		Yes			Weakness of your arm leg, face, or half of your body			Yes		Truly life-threatening			Time seemed to go faster or slower than usual			Faster than usual			I remembered many past events			Everything about myself or others			No, it was a neutral				Happiness			I felt no longer in conflict with nature
10507810504	225134152	2019-02-04 16:47:31	2019-02-04 16:49:28	90.255.83.86					xxxxxxxx	31			Other	Yes		Yes		Yes					None of the above		No
10507810214	225134152	2019-02-04 16:47:36	2019-02-04 16:48:35	82.21.201.108					xxxxxxxx	38	Female			Yes		Yes		Yes					None of the above		No
10507810076	225134152	2019-02-04 16:47:17	2019-02-04 16:51:37	2.229.214.200					xxxxxxxx	29	Female			Yes			No							Yes			Not truly life-threatening, but it felt like it			Everything seemed to be happening at once; or time stopped or lost all meaning	No			No			No			No, it was unpleasant				No			No
10507809993	225134152	2019-02-04 16:47:21	2019-02-04 16:49:11	37.189.106.108					xxxxxxxx	22	Female			Yes		Yes		Yes					None of the above		No
10507809928	225134152	2019-02-04 16:47:26	2019-02-04 16:47:59	146.200.239.52					xxxxxxxx	31	Female				No										No
10507809860	225134152	2019-02-04 16:47:28	2019-02-04 16:49:27	24.57.98.111					xxxxxxxx	19		Male		Yes			No							Yes			Not truly life-threatening, but it felt like it			Everything seemed to be happening at once; or time stopped or lost all meaning		Faster than usual			I remembered many past events		No					I felt relief and calmness		No					I felt united or one with the world
10507809855	225134152	2019-02-04 16:47:28	2019-02-04 16:48:04	213.205.241.190					xxxxxxxx	33	Female				No										No
10507809726	225134152	2019-02-04 16:47:11	2019-02-04 16:48:58	189.183.46.233					xxxxxxxx	43		Male			No										No
10507809697	225134152	2019-02-04 16:47:20	2019-02-04 16:49:31	89.197.37.78					xxxxxxxx	22		Male		Yes		Yes		Yes					None of the above	Yes		Truly life-threatening			Time seemed to go faster or slower than usual		No			No			No			No, it was unpleasant				No			No
10507809529	225134152	2019-02-04 16:47:09	2019-02-04 16:49:13	86.26.166.7					xxxxxxxx	50	Female			Yes		Yes		Yes			Weakness of your arm leg, face, or half of your body				No
10507809516	225134152	2019-02-04 16:47:06	2019-02-04 16:48:39	90.196.206.136					xxxxxxxx	29	Female			Yes		Yes		Yes		Numbness or tingling of your body or face					No
10507809401	225134152	2019-02-04 16:47:02	2019-02-04 16:50:26	195.228.20.6					xxxxxxxx	41		Male		Yes		Yes			No				None of the above		No
10507809375	225134152	2019-02-04 16:47:14	2019-02-04 16:50:09	99.241.122.133					xxxxxxxx	35		Male		Yes		Yes			No				None of the above	Yes		Truly life-threatening			Time seemed to go faster or slower than usual		No			No			No			No, it was unpleasant				No			No
10507809370	225134152	2019-02-04 16:47:18	2019-02-04 16:48:03	143.225.56.164					xxxxxxxx	20		Male			No										No
10507809340	225134152	2019-02-04 16:47:06	2019-02-04 16:48:13	176.199.254.245					xxxxxxxx	31		Male		Yes		Yes			No			Difficulty speaking		Yes			Not truly life-threatening, but it felt like it	No				Faster than usual			I remembered many past events			Everything about myself or others			No, it was a neutral				Happiness			I felt no longer in conflict with nature
10507809325	225134152	2019-02-04 16:47:17	2019-02-04 16:50:33	86.173.119.156					xxxxxxxx	32	Female			Yes		Yes		Yes					None of the above	Yes		Truly life-threatening			Time seemed to go faster or slower than usual		No			No			No					I felt relief and calmness		No			No
10507809245	225134152	2019-02-04 16:47:10	2019-02-04 16:47:47	2.24.207.27					xxxxxxxx	42	Female				No										No
10507809011	225134152	2019-02-04 16:47:13	2019-02-04 16:52:57	82.4.146.30					xxxxxxxx	29	Female			Yes		Yes		Yes					None of the above	Yes			Not truly life-threatening, but it felt like it			Everything seemed to be happening at once; or time stopped or lost all meaning		Faster than usual		No			No			No, it was unpleasant				No			No
10507808976	225134152	2019-02-04 16:47:00	2019-02-04 16:48:42	193.136.33.109					xxxxxxxx	22	Female			Yes			No								No
10507808922	225134152	2019-02-04 16:46:53	2019-02-04 16:48:16	188.29.164.231					xxxxxxxx	36		Male			No										No
10507808815	225134152	2019-02-04 16:47:05	2019-02-04 16:49:29	193.60.79.167					xxxxxxxx	46	Female			Yes			No							Yes			Not truly life-threatening, but it felt like it			Everything seemed to be happening at once; or time stopped or lost all meaning	No			No			No			No, it was unpleasant				No			No
10507808685	225134152	2019-02-04 16:46:57	2019-02-04 16:48:38	62.28.66.158					xxxxxxxx	43	Female			Yes		Yes		Yes					None of the above		No
10507808668	225134152	2019-02-04 16:46:34	2019-02-04 16:48:32	93.176.159.147					xxxxxxxx	21	Female			Yes			No								No
10507808511	225134152	2019-02-04 16:46:58	2019-02-04 16:49:49	62.2.85.130					xxxxxxxx	22		Male		Yes		Yes		Yes		Numbness or tingling of your body or face				Yes			Not truly life-threatening, but it felt like it	No			No			No			No					I felt relief and calmness		No			No
10507808496	225134152	2019-02-04 16:47:00	2019-02-04 16:47:36	148.197.98.242					xxxxxxxx	39	Female			Yes			No								No
10507808393	225134152	2019-02-04 16:46:50	2019-02-04 16:48:30	193.137.28.161					xxxxxxxx	22		Male		Yes			No								No
10507808260	225134152	2019-02-04 16:46:27	2019-02-04 16:49:20	93.44.98.244					xxxxxxxx	26		Male		Yes			No								No
10507808199	225134152	2019-02-04 16:46:44	2019-02-04 16:48:25	190.211.8.145					xxxxxxxx	24		Male		Yes			No							Yes			Not truly life-threatening, but it felt like it	No				Faster than usual		No			No			No, it was unpleasant				No			No
10507807967	225134152	2019-02-04 16:46:41	2019-02-04 16:50:58	95.62.37.252					xxxxxxxx	29	Female			Yes		Yes		Yes					None of the above	Yes		Truly life-threatening			Time seemed to go faster or slower than usual			Faster than usual		No			No			No, it was unpleasant				No			No
10507807936	225134152	2019-02-04 16:46:33	2019-02-04 16:47:26	62.74.19.104					xxxxxxxx	30	Female				No										No
10507807916	225134152	2019-02-04 16:46:21	2019-02-04 16:51:12	86.174.160.44					xxxxxxxx	60		Male		Yes			No							Yes			Not truly life-threatening, but it felt like it			Everything seemed to be happening at once; or time stopped or lost all meaning		Faster than usual		No			No			No, it was unpleasant				No			No
10507807867	225134152	2019-02-04 16:46:42	2019-02-04 16:47:34	94.197.120.20					xxxxxxxx	36	Female			Yes		Yes		Yes					None of the above		No
10507807807	225134152	2019-02-04 16:46:30	2019-02-04 16:48:31	188.28.141.216					xxxxxxxx	38		Male		Yes			No							Yes		Truly life-threatening		No				Faster than usual		No			No			No, it was unpleasant				No			No
10507807714	225134152	2019-02-04 16:46:38	2019-02-04 16:47:32	77.98.48.236					xxxxxxxx	45		Male		Yes		Yes			No				None of the above		No
10507807620	225134152	2019-02-04 16:46:01	2019-02-04 16:56:47	81.105.204.131					xxxxxxxx	55	Female			Yes		Yes		Yes			Weakness of your arm leg, face, or half of your body			Yes		Truly life-threatening			Time seemed to go faster or slower than usual			Faster than usual			I remembered many past events		No			No, it was unpleasant				No			No
10507807568	225134152	2019-02-04 16:46:30	2019-02-04 16:47:24	109.151.99.55					xxxxxxxx	20		Male			No										No
10507807500	225134152	2019-02-04 16:46:24	2019-02-04 16:51:43	194.125.24.152					xxxxxxxx	30		Male		Yes			No							Yes		Truly life-threatening				Everything seemed to be happening at once; or time stopped or lost all meaning			Incredibly faster	No			No				No, it was a neutral			No			No
10507807350	225134152	2019-02-04 16:46:29	2019-02-04 16:47:32	212.18.176.54					xxxxxxxx	35		Male		Yes			No								No
10507806985	225134152	2019-02-04 16:46:16	2019-02-04 16:47:07	81.111.203.45					xxxxxxxx	45	Female				No										No
10507806862	225134152	2019-02-04 16:46:14	2019-02-04 16:47:34	86.28.159.38					xxxxxxxx	30	Female			Yes		Yes			No				None of the above		No
10507806738	225134152	2019-02-04 16:46:10	2019-02-04 16:48:03	178.85.186.229					xxxxxxxx	21	Female				No									Yes			Not truly life-threatening, but it felt like it			Everything seemed to be happening at once; or time stopped or lost all meaning	No			No			No			No, it was unpleasant				No			No
10507806683	225134152	2019-02-04 16:46:11	2019-02-04 16:47:48	87.17.230.217					xxxxxxxx	22		Male		Yes		Yes		Yes		Numbness or tingling of your body or face				Yes			Not truly life-threatening, but it felt like it			Everything seemed to be happening at once; or time stopped or lost all meaning		Faster than usual			I remembered many past events		No				No, it was a neutral			No			No
10507806677	225134152	2019-02-04 16:45:46	2019-02-04 16:48:28	193.137.92.110					xxxxxxxx	22		Male			No										No
10507806671	225134152	2019-02-04 16:45:51	2019-02-04 16:48:34	82.42.111.25					xxxxxxxx	21	Female			Yes			No							Yes			Not truly life-threatening, but it felt like it			Everything seemed to be happening at once; or time stopped or lost all meaning			Incredibly faster	No			No			No, it was unpleasant				No			No
10507806212	225134152	2019-02-04 16:45:54	2019-02-04 16:46:39	89.102.117.133					xxxxxxxx	21		Male			No										No
10507806178	225134152	2019-02-04 16:45:41	2019-02-04 16:47:49	62.167.26.153					xxxxxxxx	23		Male		Yes		Yes		Yes			Weakness of your arm leg, face, or half of your body				No
10507806169	225134152	2019-02-04 16:45:52	2019-02-04 16:47:03	193.191.210.100					xxxxxxxx	26	Female			Yes			No								No
10507806165	225134152	2019-02-04 16:45:53	2019-02-04 16:47:06	217.30.64.235					xxxxxxxx	42		Male			No										No
10507806092	225134152	2019-02-04 16:45:44	2019-02-04 16:47:26	176.79.69.152					xxxxxxxx	18		Male		Yes		Yes			No				None of the above		No
10507806001	225134152	2019-02-04 16:45:52	2019-02-04 16:46:31	94.6.235.123					xxxxxxxx	39	Female			Yes			No								No
10507805907	225134152	2019-02-04 16:45:46	2019-02-04 16:47:24	148.252.128.29					xxxxxxxx	21		Male			No										No
10507805879	225134152	2019-02-04 16:45:31	2019-02-04 16:48:32	5.173.113.57					xxxxxxxx	22	Female			Yes		Yes		Yes					None of the above		No
10507805856	225134152	2019-02-04 16:45:48	2019-02-04 16:46:54	94.62.244.50					xxxxxxxx	20		Male			No										No
10507805633	225134152	2019-02-04 16:45:32	2019-02-04 16:46:24	93.36.180.164					xxxxxxxx	21		Male		Yes			No								No
10507805551	225134152	2019-02-04 16:45:39	2019-02-04 16:46:50	62.74.3.150					xxxxxxxx	19	Female			Yes		Yes		Yes					None of the above		No
10507805450	225134152	2019-02-04 16:45:32	2019-02-04 16:48:04	2.100.66.137					xxxxxxxx	67		Male			No									Yes			Not truly life-threatening, but it felt like it		Time seemed to go faster or slower than usual			Faster than usual			I remembered many past events				Everything about the universe				I felt incredible peace or pleasantness			Incredible joy			I felt united or one with the world
10507805329	225134152	2019-02-04 16:45:37	2019-02-04 16:48:46	87.246.196.35					xxxxxxxx	20		Male			No										No
10507805133	225134152	2019-02-04 16:44:38	2019-02-04 16:54:18	37.47.28.64					xxxxxxxx	33	Female			Yes		Yes		Yes					None of the above		No
10507805095	225134152	2019-02-04 16:44:46	2019-02-04 16:46:33	213.205.198.231					xxxxxxxx	33		Male		Yes			No								No
10507804826	225134152	2019-02-04 16:45:17	2019-02-04 16:46:04	154.59.142.114					xxxxxxxx	29	Female			Yes		Yes		Yes				Difficulty speaking			No
10507804670	225134152	2019-02-04 16:45:08	2019-02-04 16:57:51	86.15.202.210					xxxxxxxx	35	Female			Yes			No							Yes		Truly life-threatening			Time seemed to go faster or slower than usual		No			No			No			No, it was unpleasant				No			No
10507804503	225134152	2019-02-04 16:45:09	2019-02-04 16:47:05	89.152.159.191					xxxxxxxx	23	Female			Yes			No							Yes			Not truly life-threatening, but it felt like it			Everything seemed to be happening at once; or time stopped or lost all meaning		Faster than usual			I remembered many past events			Everything about myself or others		No, it was unpleasant				No			No
10507803598	225134152	2019-02-04 16:43:57	2019-02-04 16:47:17	82.11.203.209					xxxxxxxx	21		Male		Yes		Yes		Yes					None of the above		No
10507803374	225134152	2019-02-04 16:44:38	2019-02-04 16:46:31	167.98.45.36					xxxxxxxx	29		Male		Yes			No								No
10507803271	225134152	2019-02-04 16:44:30	2019-02-04 16:45:32	72.160.159.73					xxxxxxxx	25		Male			No									Yes		Truly life-threatening
10507803243	225134152	2019-02-04 16:44:14	2019-02-04 16:48:15	98.185.243.44					xxxxxxxx	27	Female			Yes		Yes			No				None of the above	Yes			Not truly life-threatening, but it felt like it			Everything seemed to be happening at once; or time stopped or lost all meaning	No				I remembered many past events		No			No, it was unpleasant				No			No
10507803083	225134152	2019-02-04 16:44:31	2019-02-04 16:46:56	193.137.92.70					xxxxxxxx	22	Female			Yes		Yes			No				None of the above		No
10507803064	225134152	2019-02-04 16:44:31	2019-02-04 16:45:37	5.70.170.63					xxxxxxxx	31	Female			Yes		Yes			No				None of the above		No
10507802889	225134152	2019-02-04 16:44:25	2019-02-04 16:45:04	155.41.164.26					xxxxxxxx	23	Female				No										No
10507802824	225134152	2019-02-04 16:44:29	2019-02-04 16:45:56	194.125.125.240					xxxxxxxx	37		Male		Yes			No								No
10507802634	225134152	2019-02-04 16:43:48	2019-02-04 16:45:11	81.108.91.64					xxxxxxxx	48	Female			Yes		Yes			No				None of the above		No
10507802528	225134152	2019-02-04 16:44:08	2019-02-04 16:45:53	79.166.235.52					xxxxxxxx	24		Male			No										No
10507802323	225134152	2019-02-04 16:44:16	2019-02-04 16:45:32	193.203.71.131					xxxxxxxx	25	Female			Yes			No								No
10507802237	225134152	2019-02-04 16:44:15	2019-02-04 16:45:52	86.182.15.113					xxxxxxxx	30	Female			Yes			No							Yes		Truly life-threatening			Time seemed to go faster or slower than usual		No				I remembered many past events			Everything about myself or others			No, it was a neutral			No			No
10507802077	225134152	2019-02-04 16:44:01	2019-02-04 16:45:38	157.52.8.9					xxxxxxxx	74		Male		Yes		Yes			No				None of the above		No
10507801975	225134152	2019-02-04 16:43:40	2019-02-04 16:45:42	86.181.16.123					xxxxxxxx	32	Female				No										No
10507801866	225134152	2019-02-04 16:43:53	2019-02-04 16:44:51	90.240.59.234					xxxxxxxx	34	Female				No										No
10507801861	225134152	2019-02-04 16:44:06	2019-02-04 16:45:21	50.4.158.123					xxxxxxxx	42		Male		Yes		Yes		Yes					None of the above		No
10507801823	225134152	2019-02-04 16:44:03	2019-02-04 16:45:09	94.69.179.51					xxxxxxxx	25		Male		Yes			No								No
10507801736	225134152	2019-02-04 16:43:08	2019-02-04 16:45:16	109.67.66.4					xxxxxxxx	36		Male			No										No
10507801631	225134152	2019-02-04 16:44:00	2019-02-04 16:44:54	5.71.160.113					xxxxxxxx	38	Female			Yes			No								No
10507801313	225134152	2019-02-04 16:43:48	2019-02-04 16:45:03	87.239.222.2					xxxxxxxx	22		Male			No										No
10507801084	225134152	2019-02-04 16:43:38	2019-02-04 16:44:37	95.94.141.59					xxxxxxxx	22		Male		Yes			No								No
10507800917	225134152	2019-02-04 16:43:35	2019-02-04 16:47:35	122.57.148.102					xxxxxxxx	43		Male		Yes			No							Yes		Truly life-threatening		No			No				I remembered many past events		No					I felt relief and calmness		No			No
10507800611	225134152	2019-02-04 16:43:39	2019-02-04 16:44:03	143.53.30.88					xxxxxxxx	21	Female			Yes			No								No
10507800523	225134152	2019-02-04 16:43:31	2019-02-04 16:50:10	217.105.3.73					xxxxxxxx	30		Male			No									Yes		Truly life-threatening			Time seemed to go faster or slower than usual			Faster than usual		No			No			No, it was unpleasant				No			No
10507800468	225134152	2019-02-04 16:43:31	2019-02-04 16:45:09	37.47.37.32					xxxxxxxx	18		Male			No										No
10507800457	225134152	2019-02-04 16:43:02	2019-02-04 16:45:09	5.173.153.116					xxxxxxxx	31		Male		Yes		Yes			No		Weakness of your arm leg, face, or half of your body				No
10507800362	225134152	2019-02-04 16:43:24	2019-02-04 16:44:08	83.34.209.159					xxxxxxxx	24		Male			No										No
10507800229	225134152	2019-02-04 16:43:04	2019-02-04 16:44:29	81.108.197.96					xxxxxxxx	26		Male			No										No
10507800191	225134152	2019-02-04 16:43:09	2019-02-04 16:44:20	188.222.158.170					xxxxxxxx	34	Female			Yes		Yes		Yes			Weakness of your arm leg, face, or half of your body				No
10507800101	225134152	2019-02-04 16:43:21	2019-02-04 16:45:02	195.171.18.240					xxxxxxxx	24	Female			Yes			No							Yes		Truly life-threatening			Time seemed to go faster or slower than usual		No			No			No			No, it was unpleasant				No			No
10507799950	225134152	2019-02-04 16:43:01	2019-02-04 16:44:54	213.205.251.117					xxxxxxxx	23	Female			Yes		Yes			No				None of the above		No
10507799750	225134152	2019-02-04 16:43:07	2019-02-04 16:44:26	83.4.20.73					xxxxxxxx	19		Male		Yes		Yes			No				None of the above		No
10507799296	225134152	2019-02-04 16:43:01	2019-02-04 16:45:16	62.6.52.11					xxxxxxxx	26	Female			Yes			No							Yes			Not truly life-threatening, but it felt like it			Everything seemed to be happening at once; or time stopped or lost all meaning		Faster than usual		No			No				No, it was a neutral			No				I felt no longer in conflict with nature
10507799195	225134152	2019-02-04 16:42:34	2019-02-04 16:44:58	80.2.131.12					xxxxxxxx	33	Female				No										No
10507799183	225134152	2019-02-04 16:42:32	2019-02-04 16:45:16	148.63.255.149					xxxxxxxx	25		Male			No										No
10507799175	225134152	2019-02-04 16:42:43	2019-02-04 16:44:01	86.154.174.182					xxxxxxxx	63		Male		Yes			No								No
10507799006	225134152	2019-02-04 16:42:47	2019-02-04 16:43:24	178.252.25.220					xxxxxxxx	33		Male			No										No
10507798902	225134152	2019-02-04 16:42:56	2019-02-04 16:43:55	176.27.144.29					xxxxxxxx	38	Female			Yes		Yes		Yes					None of the above	Yes			Not truly life-threatening, but it felt like it			Everything seemed to be happening at once; or time stopped or lost all meaning	No				I remembered many past events		No			No, it was unpleasant				No			No
10507798634	225134152	2019-02-04 16:42:42	2019-02-04 16:44:07	90.206.50.206					xxxxxxxx	41	Female			Yes		Yes		Yes		Numbness or tingling of your body or face					No
10507798546	225134152	2019-02-04 16:42:30	2019-02-04 16:44:38	195.223.85.194					xxxxxxxx	28		Male		Yes		Yes		Yes		Numbness or tingling of your body or face					No
10507798355	225134152	2019-02-04 16:42:29	2019-02-04 16:43:36	86.175.35.165					xxxxxxxx	48	Female			Yes			No								No
10507798121	225134152	2019-02-04 16:42:22	2019-02-04 16:43:53	89.180.28.152					xxxxxxxx	21	Female			Yes		Yes		Yes			Weakness of your arm leg, face, or half of your body				No
10507798083	225134152	2019-02-04 16:42:31	2019-02-04 16:44:36	84.150.228.117					xxxxxxxx	28		Male		Yes			No							Yes		Truly life-threatening				Everything seemed to be happening at once; or time stopped or lost all meaning		Faster than usual		No			No			No, it was unpleasant				No			No
10507797550	225134152	2019-02-04 16:42:14	2019-02-04 16:45:05	213.127.116.145					xxxxxxxx	22		Male			No										No		Not truly life-threatening, but it felt like it
10507797426	225134152	2019-02-04 16:42:08	2019-02-04 16:43:36	37.47.49.254					xxxxxxxx	28		Male		Yes			No							Yes			Not truly life-threatening, but it felt like it		Time seemed to go faster or slower than usual			Faster than usual				My past flashed before me, out of my control			Everything about the universe		No, it was a neutral				Happiness				I felt united or one with the world
10507797328	225134152	2019-02-04 16:42:09	2019-02-04 16:44:07	5.65.79.100					xxxxxxxx	36	Female			Yes		Yes		Yes		Numbness or tingling of your body or face					No
10507797225	225134152	2019-02-04 16:42:04	2019-02-04 16:43:36	213.58.162.34					xxxxxxxx	32		Male			No										No
10507796974	225134152	2019-02-04 16:42:04	2019-02-04 16:42:57	91.125.53.200					xxxxxxxx	24			Other	Yes		Yes		Yes		Numbness or tingling of your body or face					No
10507796944	225134152	2019-02-04 16:41:50	2019-02-04 16:43:21	82.19.153.205					xxxxxxxx	38	Female			Yes		Yes		Yes				Difficulty speaking			No
10507796915	225134152	2019-02-04 16:37:14	2019-02-04 16:44:17	87.33.253.102					xxxxxxxx	22	Female				No									Yes		Truly life-threatening				Everything seemed to be happening at once; or time stopped or lost all meaning			Incredibly faster			My past flashed before me, out of my control	No			No, it was unpleasant				No			No
10507796711	225134152	2019-02-04 16:41:47	2019-02-04 16:44:32	82.34.98.244					xxxxxxxx	36	Female			Yes		Yes			No				None of the above		No
10507796693	225134152	2019-02-04 16:41:38	2019-02-04 16:44:51	82.3.58.108					xxxxxxxx	26	Female			Yes		Yes		Yes			Weakness of your arm leg, face, or half of your body			Yes			Not truly life-threatening, but it felt like it			Everything seemed to be happening at once; or time stopped or lost all meaning	No				I remembered many past events		No			No, it was unpleasant				No			No
10507796603	225134152	2019-02-04 16:41:38	2019-02-04 16:43:11	79.37.114.118					xxxxxxxx	35	Female			Yes			No								No
10507796552	225134152	2019-02-04 16:41:41	2019-02-04 16:43:37	92.21.129.227					xxxxxxxx	37	Female			Yes		Yes		Yes					None of the above		No
10507796414	225134152	2019-02-04 16:41:30	2019-02-04 16:43:03	160.78.221.1					xxxxxxxx	26		Male		Yes			No								No
10507796370	225134152	2019-02-04 16:40:51	2019-02-04 16:46:36	174.255.0.126					xxxxxxxx	34	Female			Yes			No							Yes		Truly life-threatening				Everything seemed to be happening at once; or time stopped or lost all meaning		Faster than usual		No			No				No, it was a neutral			No			No
10507796330	225134152	2019-02-04 16:41:36	2019-02-04 16:43:06	77.174.25.43					xxxxxxxx	47		Male		Yes		Yes		Yes		Numbness or tingling of your body or face					No
10507796194	225134152	2019-02-04 16:41:35	2019-02-04 16:43:02	213.22.94.222					xxxxxxxx	22	Female			Yes			No								No
10507795879	225134152	2019-02-04 16:40:57	2019-02-04 16:42:50	50.81.178.92					xxxxxxxx	24		Male			No										No
10507795551	225134152	2019-02-04 16:41:23	2019-02-04 16:42:12	90.213.5.217					xxxxxxxx	46		Male		Yes			No								No
10507795404	225134152	2019-02-04 16:40:52	2019-02-04 16:43:26	147.162.174.79					xxxxxxxx	26	Female			Yes			No								No
10507795325	225134152	2019-02-04 16:41:13	2019-02-04 16:42:19	83.8.22.94					xxxxxxxx	22		Male		Yes			No								No
10507795196	225134152	2019-02-04 16:41:02	2019-02-04 16:42:38	2.82.164.15					xxxxxxxx	27	Female				No										No
10507795116	225134152	2019-02-04 16:41:08	2019-02-04 16:42:05	176.79.71.152					xxxxxxxx	28		Male			No										No
10507794970	225134152	2019-02-04 16:41:05	2019-02-04 16:42:03	90.255.160.110					xxxxxxxx	35	Female			Yes			No								No
10507794896	225134152	2019-02-04 16:41:06	2019-02-04 16:42:14	79.34.213.6					xxxxxxxx	25		Male		Yes			No								No
10507794869	225134152	2019-02-04 16:40:50	2019-02-04 16:53:48	98.5.57.61					xxxxxxxx	20		Male		Yes			No							Yes		Truly life-threatening			Time seemed to go faster or slower than usual		No			No				Everything about myself or others		No, it was unpleasant				No			No
10507794838	225134152	2019-02-04 16:41:09	2019-02-04 16:43:25	176.26.220.167					xxxxxxxx	66		Male			No										No
10507794674	225134152	2019-02-04 16:41:03	2019-02-04 16:41:56	82.132.185.210					xxxxxxxx	23	Female			Yes		Yes		Yes			Weakness of your arm leg, face, or half of your body				No
10507794282	225134152	2019-02-04 16:40:48	2019-02-04 16:42:26	109.196.85.139					xxxxxxxx	29		Male		Yes		Yes			No				None of the above		No
10507794013	225134152	2019-02-04 16:40:38	2019-02-04 16:41:28	83.86.219.121					xxxxxxxx	18		Male			No										No
10507794006	225134152	2019-02-04 16:40:47	2019-02-04 16:41:17	144.32.240.144					xxxxxxxx	18		Male			No										No
10507793908	225134152	2019-02-04 16:40:49	2019-02-04 16:41:40	137.222.114.243					xxxxxxxx	27	Female			Yes		Yes			No				None of the above		No
10507793844	225134152	2019-02-04 16:40:30	2019-02-04 16:41:33	85.255.237.178					xxxxxxxx	40	Female			Yes		Yes		Yes		Numbness or tingling of your body or face					No
10507793626	225134152	2019-02-04 16:40:39	2019-02-04 16:43:07	74.134.215.12					xxxxxxxx	39	Female				No									Yes		Truly life-threatening			Time seemed to go faster or slower than usual		No			No			No			No, it was unpleasant				No			No
10507793598	225134152	2019-02-04 16:40:39	2019-02-04 16:41:49	86.152.76.125					xxxxxxxx	40		Male		Yes		Yes		Yes					None of the above		No
10507793591	225134152	2019-02-04 16:40:31	2019-02-04 16:48:12	87.226.28.45					xxxxxxxx	26		Male			No									Yes		Truly life-threatening				Everything seemed to be happening at once; or time stopped or lost all meaning		Faster than usual			I remembered many past events			Everything about myself or others					I felt incredible peace or pleasantness	No				I felt no longer in conflict with nature
10507792785	225134152	2019-02-04 16:40:20	2019-02-04 16:41:18	137.222.114.244					xxxxxxxx	29	Female			Yes		Yes			No				None of the above		No
10507792771	225134152	2019-02-04 16:39:34	2019-02-04 16:47:37	80.244.96.53					xxxxxxxx	27	Female				No									Yes			Not truly life-threatening, but it felt like it			Everything seemed to be happening at once; or time stopped or lost all meaning	No			No			No			No, it was unpleasant				No			No
10507792682	225134152	2019-02-04 16:40:08	2019-02-04 16:40:53	31.52.24.9					xxxxxxxx	41	Female			Yes			No								No
10507792295	225134152	2019-02-04 16:40:02	2019-02-04 16:40:55	93.95.251.71					xxxxxxxx	33		Male			No										No
10507791580	225134152	2019-02-04 16:39:30	2019-02-04 16:42:49	50.226.75.238					xxxxxxxx	27	Female			Yes		Yes		Yes		Numbness or tingling of your body or face				Yes		Truly life-threatening			Time seemed to go faster or slower than usual		No			No				Everything about myself or others				I felt relief and calmness		No				I felt no longer in conflict with nature
10507791553	225134152	2019-02-04 16:39:38	2019-02-04 16:40:21	109.242.175.47					xxxxxxxx	23		Male			No										No
10507791431	225134152	2019-02-04 16:39:31	2019-02-04 16:42:56	200.68.128.106					xxxxxxxx	25		Male		Yes			No								No
10507791227	225134152	2019-02-04 16:39:43	2019-02-04 16:40:17	82.152.26.217					xxxxxxxx	27		Male		Yes			No								No
10507791077	225134152	2019-02-04 16:39:31	2019-02-04 16:41:03	68.71.4.106					xxxxxxxx	38		Male		Yes		Yes			No				None of the above		No
10507790963	225134152	2019-02-04 16:39:24	2019-02-04 16:41:40	5.173.32.175					xxxxxxxx	18		Male			No										No
10507790667	225134152	2019-02-04 16:39:17	2019-02-04 16:44:03	82.132.239.108					xxxxxxxx	53		Male		Yes		Yes			No				None of the above	Yes		Truly life-threatening			Time seemed to go faster or slower than usual		No			No				Everything about myself or others					I felt incredible peace or pleasantness		Happiness		No
10507790577	225134152	2019-02-04 16:39:11	2019-02-04 16:39:58	89.142.122.76					xxxxxxxx	20		Male			No										No
10507790361	225134152	2019-02-04 16:38:59	2019-02-04 16:41:18	24.140.230.102					xxxxxxxx	25		Male			No									Yes		Truly life-threatening		No				Faster than usual		No			No				No, it was a neutral			No			No
10507790352	225134152	2019-02-04 16:39:16	2019-02-04 16:42:36	84.45.203.161					xxxxxxxx	24		Male			No									Yes		Truly life-threatening				Everything seemed to be happening at once; or time stopped or lost all meaning	No			No			No					I felt relief and calmness		No			No
10507789983	225134152	2019-02-04 16:39:00	2019-02-04 16:39:57	203.220.222.187					xxxxxxxx	22		Male			No										No
10507789540	225134152	2019-02-04 16:38:51	2019-02-04 16:41:39	108.5.233.30					xxxxxxxx	27		Male		Yes		Yes		Yes			Weakness of your arm leg, face, or half of your body			Yes		Truly life-threatening			Time seemed to go faster or slower than usual			Faster than usual		No			No			No, it was unpleasant				No			No
10507789472	225134152	2019-02-04 16:38:45	2019-02-04 16:40:24	85.241.62.153					xxxxxxxx	28		Male			No										No
10507789447	225134152	2019-02-04 16:38:51	2019-02-04 16:40:23	2.127.212.187					xxxxxxxx	35	Female			Yes		Yes		Yes			Weakness of your arm leg, face, or half of your body				No
10507789395	225134152	2019-02-04 16:38:48	2019-02-04 16:40:05	88.100.203.3					xxxxxxxx	26		Male		Yes		Yes		Yes					None of the above		No
10507789040	225134152	2019-02-04 16:38:39	2019-02-04 16:42:02	134.157.254.96					xxxxxxxx	24	Female			Yes			No							Yes			Not truly life-threatening, but it felt like it			Everything seemed to be happening at once; or time stopped or lost all meaning	No				I remembered many past events		No					I felt relief and calmness		No			No
10507788878	225134152	2019-02-04 16:38:42	2019-02-04 16:39:25	85.24.109.176					xxxxxxxx	21		Male		Yes		Yes		Yes					None of the above		No
10507788299	225134152	2019-02-04 16:38:06	2019-02-04 16:39:26	85.226.71.216					xxxxxxxx	28		Male		Yes			No								No
10507788157	225134152	2019-02-04 16:38:19	2019-02-04 16:39:39	46.22.104.126					xxxxxxxx	30		Male			No										No
10507788124	225134152	2019-02-04 16:38:05	2019-02-04 16:40:36	89.155.166.184					xxxxxxxx	22	Female			Yes		Yes			No				None of the above		No
10507787987	225134152	2019-02-04 16:37:59	2019-02-04 16:39:13	130.88.240.84					xxxxxxxx	20	Female			Yes			No								No
10507787575	225134152	2019-02-04 16:36:49	2019-02-04 16:40:18	91.222.58.230					xxxxxxxx	31	Female				No										No
10507787339	225134152	2019-02-04 16:37:53	2019-02-04 16:40:44	86.6.57.0					xxxxxxxx	20	Female			Yes		Yes		Yes				Difficulty speaking		Yes			Not truly life-threatening, but it felt like it		Time seemed to go faster or slower than usual		No				I remembered many past events		No			No, it was unpleasant				No			No
10507787051	225134152	2019-02-04 16:37:59	2019-02-04 16:38:38	128.240.225.41					xxxxxxxx	20	Female				No										No
10507786963	225134152	2019-02-04 16:37:56	2019-02-04 16:42:41	2.137.251.197					xxxxxxxx	25	Female			Yes			No							Yes			Not truly life-threatening, but it felt like it		Time seemed to go faster or slower than usual		No			No			No			No, it was unpleasant				No			No
10507786604	225134152	2019-02-04 16:37:38	2019-02-04 16:38:39	109.144.215.118					xxxxxxxx	26	Female			Yes		Yes		Yes					None of the above		No
10507786565	225134152	2019-02-04 16:37:33	2019-02-04 16:38:45	109.159.57.9					xxxxxxxx	50	Female			Yes		Yes			No				None of the above		No
10507786536	225134152	2019-02-04 16:37:43	2019-02-04 16:38:49	84.206.64.70					xxxxxxxx	35		Male		Yes			No								No
10507786524	225134152	2019-02-04 16:37:43	2019-02-04 16:38:52	2.123.154.117					xxxxxxxx	40	Female			Yes		Yes			No				None of the above		No
10507786364	225134152	2019-02-04 16:36:42	2019-02-04 16:42:12	83.145.164.239					xxxxxxxx	41	Female			Yes			No								No
10507786349	225134152	2019-02-04 16:37:41	2019-02-04 16:39:01	131.175.147.14					xxxxxxxx	24		Male		Yes			No								No
10507786052	225134152	2019-02-04 16:37:25	2019-02-04 16:38:29	194.53.186.171					xxxxxxxx	32	Female			Yes		Yes			No				None of the above		No
10507786011	225134152	2019-02-04 16:37:26	2019-02-04 16:41:51	189.217.72.133					xxxxxxxx	27		Male		Yes			No							Yes		Truly life-threatening			Time seemed to go faster or slower than usual			Faster than usual		No			No			No, it was unpleasant				No			No
10507785759	225134152	2019-02-04 16:37:33	2019-02-04 16:38:19	109.153.184.31					xxxxxxxx	35		Male		Yes			No								No
10507785602	225134152	2019-02-04 16:35:43	2019-02-04 16:40:44	80.107.66.7					xxxxxxxx	59	Female			Yes		Yes		Yes					None of the above		No
10507785452	225134152	2019-02-04 16:37:09	2019-02-04 16:42:24	88.22.137.5					xxxxxxxx	25	Female			Yes		Yes		Yes					None of the above	Yes			Not truly life-threatening, but it felt like it		Time seemed to go faster or slower than usual			Faster than usual		No			No			No, it was unpleasant				No			No
10507785064	225134152	2019-02-04 16:36:23	2019-02-04 16:40:13	109.9.184.90					xxxxxxxx	29		Male		Yes		Yes		Yes		Numbness or tingling of your body or face				Yes		Truly life-threatening			Time seemed to go faster or slower than usual				Incredibly faster			My past flashed before me, out of my control		Everything about myself or others				I felt relief and calmness			Happiness			I felt no longer in conflict with nature
10507784876	225134152	2019-02-04 16:36:51	2019-02-04 16:38:20	88.110.97.145					xxxxxxxx	35		Male			No										No
10507784792	225134152	2019-02-04 16:37:03	2019-02-04 16:38:23	68.105.170.128					xxxxxxxx	21	Female			Yes			No								No
10507784660	225134152	2019-02-04 16:37:00	2019-02-04 16:39:08	144.124.26.193					xxxxxxxx	21		Male		Yes			No							Yes		Truly life-threatening			Time seemed to go faster or slower than usual				Incredibly faster		I remembered many past events				Everything about the universe		No, it was a neutral				Happiness				I felt united or one with the world
10507784648	225134152	2019-02-04 16:36:56	2019-02-04 16:37:54	86.28.159.113					xxxxxxxx	45		Male		Yes		Yes			No				None of the above		No
10507784482	225134152	2019-02-04 16:36:35	2019-02-04 17:03:46	62.140.132.80					xxxxxxxx	32		Male		Yes			No								No
10507784437	225134152	2019-02-04 16:35:27	2019-02-04 16:39:04	188.29.164.75					xxxxxxxx	37	Female			Yes		Yes		Yes		Numbness or tingling of your body or face					No
10507784421	225134152	2019-02-04 16:36:16	2019-02-04 16:40:26	79.66.251.184					xxxxxxxx	53	Female				No									Yes			Not truly life-threatening, but it felt like it			Everything seemed to be happening at once; or time stopped or lost all meaning	No			No			No				No, it was a neutral			No			No
10507784303	225134152	2019-02-04 16:36:52	2019-02-04 16:38:00	151.225.18.204					xxxxxxxx	39	Female			Yes			No								No
10507784085	225134152	2019-02-04 16:36:44	2019-02-04 16:37:41	177.228.32.116					xxxxxxxx	28	Female				No										No
10507783825	225134152	2019-02-04 16:36:37	2019-02-04 16:37:21	147.94.76.228					xxxxxxxx	31		Male		Yes			No								No
10507783760	225134152	2019-02-04 16:36:40	2019-02-04 16:39:59	189.156.210.110					xxxxxxxx	28	Female			Yes		Yes		Yes		Numbness or tingling of your body or face				Yes			Not truly life-threatening, but it felt like it	No			No			No			No			No, it was unpleasant				No			No
10507783549	225134152	2019-02-04 16:36:29	2019-02-04 16:37:22	82.132.238.17					xxxxxxxx	31	Female			Yes		Yes			No				None of the above		No
10507783463	225134152	2019-02-04 16:36:32	2019-02-04 16:38:46	152.115.72.198					xxxxxxxx	20	Female			Yes		Yes			No				None of the above		No
10507783355	225134152	2019-02-04 16:36:32	2019-02-04 16:37:07	137.222.61.40					xxxxxxxx	30		Male			No										No
10507783192	225134152	2019-02-04 16:36:20	2019-02-04 16:37:03	86.6.156.141					xxxxxxxx	33	Female				No										No
10507782948	225134152	2019-02-04 16:35:54	2019-02-04 16:37:59	86.13.176.33					xxxxxxxx	49	Female			Yes			No								No
10507782737	225134152	2019-02-04 16:36:08	2019-02-04 16:38:48	85.115.53.202					xxxxxxxx	38	Female			Yes		Yes		Yes					None of the above	Yes		Truly life-threatening				Everything seemed to be happening at once; or time stopped or lost all meaning	No			No			No				No, it was a neutral			No			No
10507782456	225134152	2019-02-04 16:34:01	2019-02-04 16:37:59	188.251.83.171					xxxxxxxx	26		Male		Yes		Yes			No				None of the above		No
10507782422	225134152	2019-02-04 16:36:04	2019-02-04 16:37:05	91.233.18.254					xxxxxxxx	28		Male		Yes			No								No
10507781786	225134152	2019-02-04 16:35:49	2019-02-04 16:36:31	82.32.116.141					xxxxxxxx	19		Male			No										No
10507781780	225134152	2019-02-04 16:35:34	2019-02-04 16:36:15	83.28.229.181					xxxxxxxx	23		Male			No										No
10507781719	225134152	2019-02-04 16:35:39	2019-02-04 16:37:51	5.224.18.175					xxxxxxxx	24	Female			Yes		Yes		Yes		Numbness or tingling of your body or face					No
10507781637	225134152	2019-02-04 16:35:14	2019-02-04 16:37:12	193.137.168.32					xxxxxxxx	26		Male			No										No
10507781575	225134152	2019-02-04 16:35:42	2019-02-04 16:37:16	87.151.237.99					xxxxxxxx	18	Female			Yes		Yes		Yes					None of the above		No
10507781521	225134152	2019-02-04 16:35:33	2019-02-04 16:37:34	82.10.55.220					xxxxxxxx	31	Female				No									Yes			Not truly life-threatening, but it felt like it	No			No			No			No				No, it was a neutral			No			No
10507781379	225134152	2019-02-04 16:35:29	2019-02-04 16:37:25	84.28.22.84					xxxxxxxx	35		Male		Yes			No								No
10507781267	225134152	2019-02-04 16:35:36	2019-02-04 16:40:58	139.47.1.81					xxxxxxxx	24		Male		Yes			No							Yes		Truly life-threatening			Time seemed to go faster or slower than usual		No			No			No				No, it was a neutral				Happiness		No
10507781248	225134152	2019-02-04 16:35:37	2019-02-04 16:38:15	173.49.143.68					xxxxxxxx	30	Female			Yes		Yes		Yes					None of the above	Yes		Truly life-threatening			Time seemed to go faster or slower than usual			Faster than usual				My past flashed before me, out of my control	No			No, it was unpleasant				No			No
10507780712	225134152	2019-02-04 16:35:15	2019-02-04 16:37:01	81.153.228.111					xxxxxxxx	44	Female			Yes		Yes			No				None of the above		No
10507780370	225134152	2019-02-04 16:34:52	2019-02-04 16:40:46	82.9.239.101					xxxxxxxx	21	Female			Yes		Yes		Yes					None of the above	Yes			Not truly life-threatening, but it felt like it		Time seemed to go faster or slower than usual			Faster than usual		No			No			No, it was unpleasant				No			No
10507780206	225134152	2019-02-04 16:35:08	2019-02-04 16:37:39	150.254.105.248					xxxxxxxx	20		Male			No									Yes		Truly life-threatening			Time seemed to go faster or slower than usual			Faster than usual			I remembered many past events				Everything about the universe			I felt relief and calmness		No					I felt united or one with the world
10507780164	225134152	2019-02-04 16:34:57	2019-02-04 16:36:23	92.237.185.85					xxxxxxxx	37	Female			Yes		Yes		Yes					None of the above		No
10507780091	225134152	2019-02-04 16:35:00	2019-02-04 16:35:54	2.80.100.31					xxxxxxxx	20		Male		Yes		Yes		Yes					None of the above		No
10507779829	225134152	2019-02-04 16:35:02	2019-02-04 16:36:15	193.137.92.90					xxxxxxxx	22	Female			Yes		Yes		Yes					None of the above		No
10507779773	225134152	2019-02-04 16:34:53	2019-02-04 16:35:34	212.66.75.12					xxxxxxxx	35		Male		Yes			No								No
10507779753	225134152	2019-02-04 16:34:58	2019-02-04 16:35:55	80.6.156.251					xxxxxxxx	73	Female				No										No
10507779639	225134152	2019-02-04 16:34:47	2019-02-04 16:35:33	109.147.12.23					xxxxxxxx	46		Male			No										No
10507779561	225134152	2019-02-04 16:34:38	2019-02-04 16:38:50	109.154.132.218					xxxxxxxx	23	Female			Yes			No							Yes			Not truly life-threatening, but it felt like it		Time seemed to go faster or slower than usual			Faster than usual		No			No				No, it was a neutral			No			No
10507779384	225134152	2019-02-04 16:34:43	2019-02-04 16:35:54	82.22.66.126					xxxxxxxx	26		Male		Yes			No								No
10507779321	225134152	2019-02-04 16:34:45	2019-02-04 16:35:36	71.82.227.18					xxxxxxxx	52	Female				No										No
10507779308	225134152	2019-02-04 16:34:45	2019-02-04 16:44:00	79.191.67.234					xxxxxxxx	27		Male		Yes		Yes		Yes			Weakness of your arm leg, face, or half of your body			Yes			Not truly life-threatening, but it felt like it		Time seemed to go faster or slower than usual		No			No			No			No, it was unpleasant				No				I felt no longer in conflict with nature
10507779187	225134152	2019-02-04 16:34:35	2019-02-04 16:35:15	46.254.200.66					xxxxxxxx	43	Female			Yes			No								No
10507779122	225134152	2019-02-04 16:34:39	2019-02-04 16:35:35	50.205.178.194					xxxxxxxx	38		Male		Yes		Yes		Yes					None of the above		No
10507779121	225134152	2019-02-04 16:34:01	2019-02-04 16:41:37	73.177.135.30					xxxxxxxx	27	Female			Yes			No							Yes		Truly life-threatening				Everything seemed to be happening at once; or time stopped or lost all meaning	No			No			No			No, it was unpleasant				No			No
10507779099	225134152	2019-02-04 16:34:42	2019-02-04 16:35:08	86.92.182.254					xxxxxxxx	28		Male		Yes			No								No
10507778842	225134152	2019-02-04 16:32:13	2019-02-04 16:35:17	193.137.201.126					xxxxxxxx	21	Female				No										No
10507778516	225134152	2019-02-04 16:34:10	2019-02-04 16:38:01	104.230.202.149					xxxxxxxx	41		Male		Yes			No							Yes		Truly life-threatening				Everything seemed to be happening at once; or time stopped or lost all meaning	No			No			No				No, it was a neutral			No				I felt no longer in conflict with nature
10507778210	225134152	2019-02-04 16:33:50	2019-02-04 16:50:18	31.0.83.225					xxxxxxxx	18	Female				No									Yes		Truly life-threatening		No			No				I remembered many past events		No			No, it was unpleasant						Incredible joy		I felt no longer in conflict with nature
10507778144	225134152	2019-02-04 16:33:44	2019-02-04 16:35:43	46.50.6.17					xxxxxxxx	22	Female				No										No
10507777824	225134152	2019-02-04 16:33:57	2019-02-04 16:37:22	82.31.98.26					xxxxxxxx	37	Female			Yes			No							Yes			Not truly life-threatening, but it felt like it			Everything seemed to be happening at once; or time stopped or lost all meaning		Faster than usual				My past flashed before me, out of my control		Everything about myself or others		No, it was unpleasant				No			No
10507777787	225134152	2019-02-04 16:34:01	2019-02-04 16:35:32	94.68.65.26					xxxxxxxx	33		Male			No										No
10507777621	225134152	2019-02-04 16:32:49	2019-02-04 16:37:58	83.218.99.38					xxxxxxxx	39		Male		Yes		Yes			No				None of the above		No
10507777558	225134152	2019-02-04 16:33:19	2019-02-04 16:38:31	46.189.133.23					xxxxxxxx	23	Female				No									Yes			Not truly life-threatening, but it felt like it		Time seemed to go faster or slower than usual				Incredibly faster	No			No					I felt relief and calmness		No				I felt no longer in conflict with nature
10507777497	225134152	2019-02-04 16:33:46	2019-02-04 16:34:51	193.60.79.172					xxxxxxxx	19	Female			Yes			No								No
10507777226	225134152	2019-02-04 16:33:44	2019-02-04 16:35:25	213.205.241.117					xxxxxxxx	39		Male		Yes		Yes		Yes					None of the above		No
10507777131	225134152	2019-02-04 16:33:49	2019-02-04 16:34:44	86.174.109.129					xxxxxxxx	44	Female			Yes		Yes			No				None of the above		No
10507776910	225134152	2019-02-04 16:33:25	2019-02-04 16:34:46	83.11.80.26					xxxxxxxx	18		Male			No										No
10507776889	225134152	2019-02-04 16:33:16	2019-02-04 16:34:20	62.172.169.4					xxxxxxxx	35		Male		Yes			No								No
10507776785	225134152	2019-02-04 16:33:20	2019-02-04 16:35:06	85.59.118.242					xxxxxxxx	37	Female			Yes		Yes		Yes			Weakness of your arm leg, face, or half of your body				No
10507776655	225134152	2019-02-04 16:33:36	2019-02-04 16:34:45	5.90.233.41					xxxxxxxx	24		Male		Yes		Yes			No				None of the above		No
10507776373	225134152	2019-02-04 16:33:31	2019-02-04 16:34:35	82.32.237.196					xxxxxxxx	25	Female			Yes		Yes			No				None of the above		No
10507776274	225134152	2019-02-04 16:33:22	2019-02-04 16:34:27	217.99.178.85					xxxxxxxx	20		Male			No										No
10507776108	225134152	2019-02-04 16:33:04	2019-02-04 16:34:48	24.57.32.47					xxxxxxxx	40	Female			Yes		Yes		Yes		Numbness or tingling of your body or face					No
10507776083	225134152	2019-02-04 16:33:06	2019-02-04 16:34:54	94.6.54.127					xxxxxxxx	20	Female			Yes		Yes			No		Weakness of your arm leg, face, or half of your body				No
10507776060	225134152	2019-02-04 16:33:06	2019-02-04 16:39:38	151.18.178.227					xxxxxxxx	24		Male		Yes		Yes		Yes					None of the above		No
10507775966	225134152	2019-02-04 16:33:19	2019-02-04 16:34:15	194.53.184.178					xxxxxxxx	34	Female			Yes		Yes			No				None of the above		No
10507775851	225134152	2019-02-04 16:33:01	2019-02-04 16:37:21	188.64.207.214					xxxxxxxx	26		Male		Yes		Yes			No				None of the above		No
10507775783	225134152	2019-02-04 16:33:12	2019-02-04 16:38:05	90.213.122.83					xxxxxxxx	35	Female			Yes			No							Yes			Not truly life-threatening, but it felt like it	No			No			No			No				No, it was a neutral			No			No
10507775768	225134152	2019-02-04 16:33:14	2019-02-04 16:36:17	79.18.96.141					xxxxxxxx	36		Male		Yes		Yes			No				None of the above		No
10507775466	225134152	2019-02-04 16:33:00	2019-02-04 16:36:47	213.205.198.95					xxxxxxxx	37		Male		Yes			No							Yes		Truly life-threatening			Time seemed to go faster or slower than usual			Faster than usual		No			No			No, it was unpleasant				No			No
10507775281	225134152	2019-02-04 16:32:23	2019-02-04 16:47:43	176.221.120.73					xxxxxxxx	18	Female			Yes		Yes			No			Difficulty speaking		Yes		Truly life-threatening				Everything seemed to be happening at once; or time stopped or lost all meaning			Incredibly faster	No			No					I felt relief and calmness		No			No
10507775109	225134152	2019-02-04 16:32:45	2019-02-04 16:33:46	130.209.157.48					xxxxxxxx	20	Female			Yes		Yes			No				None of the above		No
10507774746	225134152	2019-02-04 16:32:36	2019-02-04 16:36:35	46.187.183.220					xxxxxxxx	35	Female			Yes		Yes		Yes			Weakness of your arm leg, face, or half of your body				No
10507774660	225134152	2019-02-04 16:32:33	2019-02-04 16:34:22	201.156.172.43					xxxxxxxx	32	Female				No										No
10507774659	225134152	2019-02-04 16:32:38	2019-02-04 16:34:56	79.185.115.183					xxxxxxxx	23		Male		Yes			No							Yes			Not truly life-threatening, but it felt like it			Everything seemed to be happening at once; or time stopped or lost all meaning			Incredibly faster	No			No			No, it was unpleasant				No			No
10507774626	225134152	2019-02-04 16:32:46	2019-02-04 16:35:28	82.132.225.101					xxxxxxxx	33	Female				No									Yes		Truly life-threatening				Everything seemed to be happening at once; or time stopped or lost all meaning	No			No			No				No, it was a neutral			No			No
10507774388	225134152	2019-02-04 16:32:21	2019-02-04 16:34:22	187.139.17.91					xxxxxxxx	38		Male		Yes			No								No
10507774345	225134152	2019-02-04 16:32:19	2019-02-04 16:33:42	202.125.18.22					xxxxxxxx	30		Male			No										No
10507774322	225134152	2019-02-04 16:32:16	2019-02-04 16:36:54	213.205.251.66					xxxxxxxx	23	Female			Yes		Yes		Yes		Numbness or tingling of your body or face				Yes		Truly life-threatening				Everything seemed to be happening at once; or time stopped or lost all meaning	No			No			No			No, it was unpleasant				No			No
10507774134	225134152	2019-02-04 16:32:35	2019-02-04 16:33:28	89.142.112.176					xxxxxxxx	19		Male			No										No
10507774017	225134152	2019-02-04 16:32:24	2019-02-04 16:34:12	155.143.161.198					xxxxxxxx	25		Male			No									Yes		Truly life-threatening		No			No			No			No				No, it was a neutral			No			No
10507773907	225134152	2019-02-04 16:32:10	2019-02-04 16:37:54	89.212.177.244					xxxxxxxx	28		Male			No									Yes		Truly life-threatening			Time seemed to go faster or slower than usual			Faster than usual		No			No			No, it was unpleasant				No			No
10507773855	225134152	2019-02-04 16:32:17	2019-02-04 16:39:01	82.154.237.97					xxxxxxxx	23	Female			Yes		Yes		Yes			Weakness of your arm leg, face, or half of your body			Yes		Truly life-threatening			Time seemed to go faster or slower than usual				Incredibly faster	No			No			No, it was unpleasant				No			No
10507773777	225134152	2019-02-04 16:32:25	2019-02-04 16:34:55	88.130.56.28					xxxxxxxx	28	Female			Yes		Yes			No				None of the above	Yes		Truly life-threatening			Time seemed to go faster or slower than usual		No			No			No			No, it was unpleasant				No			No
10507773749	225134152	2019-02-04 16:32:15	2019-02-04 16:33:31	94.6.132.161					xxxxxxxx	47	Female			Yes			No								No
10507773669	225134152	2019-02-04 16:32:14	2019-02-04 16:33:35	81.110.16.188					xxxxxxxx	34	Female			Yes		Yes			No				None of the above		No
10507773305	225134152	2019-02-04 16:31:58	2019-02-04 16:34:08	5.173.160.240					xxxxxxxx	29		Male			No										No
10507773270	225134152	2019-02-04 16:32:03	2019-02-04 16:33:17	109.152.113.78					xxxxxxxx	38	Female			Yes		Yes		Yes					None of the above		No
10507773081	225134152	2019-02-04 16:31:56	2019-02-04 16:39:17	91.239.113.90					xxxxxxxx	23	Female			Yes		Yes		Yes		Numbness or tingling of your body or face				Yes		Truly life-threatening			Time seemed to go faster or slower than usual			Faster than usual			I remembered many past events			Everything about myself or others			No, it was a neutral				Happiness			I felt no longer in conflict with nature
10507772862	225134152	2019-02-04 16:32:01	2019-02-04 16:32:48	27.99.60.233					xxxxxxxx	19		Male		Yes			No								No
10507772817	225134152	2019-02-04 16:31:50	2019-02-04 16:37:10	68.11.234.69					xxxxxxxx	26	Female			Yes		Yes			No				None of the above		No
10507772430	225134152	2019-02-04 16:31:47	2019-02-04 16:33:22	82.48.254.127					xxxxxxxx	23		Male		Yes		Yes			No				None of the above		No
10507772225	225134152	2019-02-04 16:31:42	2019-02-04 16:33:12	129.12.234.38					xxxxxxxx	19	Female			Yes			No								No
10507772109	225134152	2019-02-04 16:31:45	2019-02-04 16:35:11	213.16.111.68					xxxxxxxx	24		Male		Yes		Yes		Yes					None of the above	Yes			Not truly life-threatening, but it felt like it			Everything seemed to be happening at once; or time stopped or lost all meaning	No			No			No			No, it was unpleasant				No			No
10507772084	225134152	2019-02-04 16:31:38	2019-02-04 16:39:38	75.72.58.151					xxxxxxxx	37	Female			Yes		Yes		Yes			Weakness of your arm leg, face, or half of your body			Yes		Truly life-threatening				Everything seemed to be happening at once; or time stopped or lost all meaning			Incredibly faster	No			No			No, it was unpleasant				No			No
10507771914	225134152	2019-02-04 16:31:31	2019-02-04 16:35:07	50.98.91.69					xxxxxxxx	56	Female				No									Yes			Not truly life-threatening, but it felt like it		Time seemed to go faster or slower than usual			Faster than usual			I remembered many past events		No				No, it was a neutral			No			No
10507771660	225134152	2019-02-04 16:31:31	2019-02-04 16:37:07	91.179.70.91					xxxxxxxx	20		Male		Yes			No							Yes		Truly life-threatening				Everything seemed to be happening at once; or time stopped or lost all meaning	No			No			No			No, it was unpleasant				No			No
10507771317	225134152	2019-02-04 16:31:21	2019-02-04 16:32:31	82.33.29.134					xxxxxxxx	48		Male		Yes		Yes		Yes					None of the above		No
10507771256	225134152	2019-02-04 16:31:13	2019-02-04 16:32:18	5.151.95.3					xxxxxxxx	22	Female			Yes			No								No
10507771176	225134152	2019-02-04 16:31:04	2019-02-04 16:35:33	86.193.183.195					xxxxxxxx	21	Female				No									Yes		Truly life-threatening			Time seemed to go faster or slower than usual			Faster than usual		No			No			No, it was unpleasant				No			No
10507771054	225134152	2019-02-04 16:31:12	2019-02-04 16:33:39	82.38.102.63					xxxxxxxx	65	Female				No									Yes			Not truly life-threatening, but it felt like it			Everything seemed to be happening at once; or time stopped or lost all meaning	No			No			No			No, it was unpleasant				No			No
10507770915	225134152	2019-02-04 16:31:10	2019-02-04 16:34:56	78.84.246.109					xxxxxxxx	22		Male			No									Yes			Not truly life-threatening, but it felt like it			Everything seemed to be happening at once; or time stopped or lost all meaning		Faster than usual		No			No			No, it was unpleasant				No			No
10507770752	225134152	2019-02-04 16:31:06	2019-02-04 16:32:17	51.6.62.196					xxxxxxxx	55	Female			Yes			No								No
10507770641	225134152	2019-02-04 16:30:55	2019-02-04 16:32:24	188.219.82.197					xxxxxxxx	29	Female				No										No
10507770427	225134152	2019-02-04 16:30:53	2019-02-04 16:36:57	193.34.52.228					xxxxxxxx	22		Male		Yes		Yes		Yes			Weakness of your arm leg, face, or half of your body			Yes		Truly life-threatening			Time seemed to go faster or slower than usual		No			No			No			No, it was unpleasant				No			No
10507770353	225134152	2019-02-04 16:30:58	2019-02-04 16:34:09	95.148.146.223					xxxxxxxx	18			Other	Yes		Yes			No				None of the above	Yes			Not truly life-threatening, but it felt like it		Time seemed to go faster or slower than usual		No			No			No			No, it was unpleasant				No			No
10507770230	225134152	2019-02-04 16:30:42	2019-02-04 16:32:04	177.228.47.48					xxxxxxxx	23		Male		Yes			No								No
10507770149	225134152	2019-02-04 16:30:53	2019-02-04 16:32:01	77.253.29.235					xxxxxxxx	23		Male			No										No
10507769883	225134152	2019-02-04 16:30:35	2019-02-04 16:32:26	90.211.76.111					xxxxxxxx	20		Male		Yes			No							Yes		Truly life-threatening				Everything seemed to be happening at once; or time stopped or lost all meaning			Incredibly faster		I remembered many past events		No			No, it was unpleasant				No			No
10507769626	225134152	2019-02-04 16:30:38	2019-02-04 16:31:17	86.168.90.231					xxxxxxxx	58		Male			No										No
10507769602	225134152	2019-02-04 16:30:05	2019-02-04 16:31:32	50.84.151.122					xxxxxxxx	29		Male			No										No
10507769507	225134152	2019-02-04 16:30:18	2019-02-04 16:31:20	5.144.212.16					xxxxxxxx	43	Female				No										No
10507769318	225134152	2019-02-04 16:30:27	2019-02-04 16:32:24	83.6.168.181					xxxxxxxx	23		Male		Yes			No							Yes			Not truly life-threatening, but it felt like it			Everything seemed to be happening at once; or time stopped or lost all meaning			Incredibly faster		I remembered many past events		No			No, it was unpleasant				No			No
10507769179	225134152	2019-02-04 16:30:21	2019-02-04 16:31:24	46.176.149.104					xxxxxxxx	30		Male		Yes			No								No
10507769038	225134152	2019-02-04 16:30:17	2019-02-04 16:32:23	194.53.187.11					xxxxxxxx	55	Female			Yes			No							Yes		Truly life-threatening				Everything seemed to be happening at once; or time stopped or lost all meaning		Faster than usual		No			No			No, it was unpleasant				No			No
10507768560	225134152	2019-02-04 16:30:08	2019-02-04 16:32:34	82.132.229.196					xxxxxxxx	39	Female			Yes		Yes		Yes		Numbness or tingling of your body or face				Yes			Not truly life-threatening, but it felt like it		Time seemed to go faster or slower than usual			Faster than usual		No			No			No, it was unpleasant				No			No
10507768235	225134152	2019-02-04 16:29:52	2019-02-04 16:35:32	89.238.29.200					xxxxxxxx	28	Female			Yes			No							Yes			Not truly life-threatening, but it felt like it		Time seemed to go faster or slower than usual			Faster than usual		No			No			No, it was unpleasant				No			No
10507768224	225134152	2019-02-04 16:29:57	2019-02-04 16:30:57	95.90.236.122					xxxxxxxx	24	Female			Yes		Yes		Yes					None of the above		No
10507768223	225134152	2019-02-04 16:29:48	2019-02-04 16:31:17	88.199.23.100					xxxxxxxx	34		Male		Yes			No								No
10507768069	225134152	2019-02-04 16:29:59	2019-02-04 16:33:19	89.135.129.247					xxxxxxxx	31		Male		Yes		Yes			No				None of the above	Yes		Truly life-threatening			Time seemed to go faster or slower than usual				Incredibly faster		I remembered many past events			Everything about myself or others				I felt relief and calmness		No				I felt no longer in conflict with nature
10507767919	225134152	2019-02-04 16:29:44	2019-02-04 16:36:44	90.209.75.65					xxxxxxxx	28		Male		Yes			No							Yes			Not truly life-threatening, but it felt like it			Everything seemed to be happening at once; or time stopped or lost all meaning			Incredibly faster		I remembered many past events				Everything about the universe		No, it was a neutral			No			No
10507767908	225134152	2019-02-04 16:29:53	2019-02-04 16:31:03	80.41.91.124					xxxxxxxx	26	Female			Yes		Yes			No				None of the above		No
10507767900	225134152	2019-02-04 16:29:55	2019-02-04 16:30:40	80.50.101.236					xxxxxxxx	28		Male			No										No
10507767871	225134152	2019-02-04 16:29:48	2019-02-04 16:33:07	82.36.203.137					xxxxxxxx	26	Female			Yes		Yes			No	Numbness or tingling of your body or face				Yes		Truly life-threatening				Everything seemed to be happening at once; or time stopped or lost all meaning	No			No			No				No, it was a neutral				Happiness			I felt no longer in conflict with nature
10507767852	225134152	2019-02-04 16:29:45	2019-02-04 16:31:04	87.196.45.211					xxxxxxxx	26		Male		Yes			No								No
10507767768	225134152	2019-02-04 16:29:29	2019-02-04 16:31:47	2.120.226.73					xxxxxxxx	38	Female			Yes		Yes		Yes					None of the above		No
10507767728	225134152	2019-02-04 16:29:30	2019-02-04 16:30:32	90.210.108.238					xxxxxxxx	35		Male		Yes			No								No
10507767481	225134152	2019-02-04 16:29:32	2019-02-04 16:30:24	2.101.108.53					xxxxxxxx	35	Female				No										No
10507767420	225134152	2019-02-04 16:29:31	2019-02-04 16:31:26	37.248.155.175					xxxxxxxx	21		Male			No										No
10507766990	225134152	2019-02-04 16:29:29	2019-02-04 16:32:01	190.113.31.138					xxxxxxxx	26		Male		Yes		Yes		Yes					None of the above	Yes			Not truly life-threatening, but it felt like it			Everything seemed to be happening at once; or time stopped or lost all meaning			Incredibly faster	No			No			No, it was unpleasant				No			No
10507766780	225134152	2019-02-04 16:29:22	2019-02-04 16:30:29	82.1.108.239					xxxxxxxx	19		Male		Yes		Yes			No				None of the above		No
10507766718	225134152	2019-02-04 16:29:17	2019-02-04 16:29:58	139.184.223.128					xxxxxxxx	22	Female				No										No
10507766712	225134152	2019-02-04 16:29:13	2019-02-04 16:30:20	86.13.109.62					xxxxxxxx	20		Male			No										No
10507766496	225134152	2019-02-04 16:29:04	2019-02-04 16:32:13	86.151.99.86					xxxxxxxx	43		Male		Yes			No							Yes		Truly life-threatening				Everything seemed to be happening at once; or time stopped or lost all meaning	No					My past flashed before me, out of my control	No			No, it was unpleasant				No			No
10507766429	225134152	2019-02-04 16:29:20	2019-02-04 16:30:00	66.207.217.18					xxxxxxxx	21		Male		Yes		Yes			No				None of the above		No
10507766355	225134152	2019-02-04 16:29:12	2019-02-04 16:36:47	93.201.53.14					xxxxxxxx	20		Male			No									Yes		Truly life-threatening				Everything seemed to be happening at once; or time stopped or lost all meaning		Faster than usual		No			No			No, it was unpleasant				No			No
10507766328	225134152	2019-02-04 16:28:23	2019-02-04 16:30:08	185.221.140.151					xxxxxxxx	22		Male		Yes			No								No
10507766221	225134152	2019-02-04 16:29:03	2019-02-04 16:30:50	87.205.120.211					xxxxxxxx	21		Male		Yes			No								No
10507766177	225134152	2019-02-04 16:28:43	2019-02-04 16:29:56	86.166.88.116					xxxxxxxx	47	Female				No										No
10507766115	225134152	2019-02-04 16:29:00	2019-02-04 16:31:18	184.162.164.144					xxxxxxxx	25	Female			Yes			No								No
10507765962	225134152	2019-02-04 16:29:03	2019-02-04 16:29:50	84.106.175.112					xxxxxxxx	24	Female			Yes		Yes			No				None of the above		No
10507765909	225134152	2019-02-04 16:29:02	2019-02-04 16:30:56	148.63.87.182					xxxxxxxx	21		Male		Yes			No							Yes		Truly life-threatening			Time seemed to go faster or slower than usual		No			No			No			No, it was unpleasant				No			No
10507765905	225134152	2019-02-04 16:28:39	2019-02-04 16:31:58	93.33.163.2					xxxxxxxx	41		Male			No										No
10507765904	225134152	2019-02-04 16:28:57	2019-02-04 16:29:58	195.62.245.234					xxxxxxxx	29		Male		Yes			No								No
10507765725	225134152	2019-02-04 16:28:48	2019-02-04 16:30:31	89.212.90.45					xxxxxxxx	29	Female			Yes		Yes			No				None of the above		No
10507765637	225134152	2019-02-04 16:28:48	2019-02-04 16:29:44	89.65.54.184					xxxxxxxx	22	Female			Yes			No								No
10507765631	225134152	2019-02-04 16:28:48	2019-02-04 16:29:42	93.35.210.47					xxxxxxxx	33	Female			Yes		Yes		Yes		Numbness or tingling of your body or face					No
10507765305	225134152	2019-02-04 16:28:41	2019-02-04 16:29:58	5.67.80.235					xxxxxxxx	18	Female			Yes			No								No
10507765119	225134152	2019-02-04 16:28:33	2019-02-04 16:30:04	77.92.38.23					xxxxxxxx	28		Male		Yes			No								No
10507765094	225134152	2019-02-04 16:28:29	2019-02-04 16:29:52	62.38.65.42					xxxxxxxx	20		Male		Yes		Yes		Yes			Weakness of your arm leg, face, or half of your body				No
10507765069	225134152	2019-02-04 16:28:30	2019-02-04 16:30:05	192.180.164.12					xxxxxxxx	32	Female			Yes		Yes			No			Difficulty speaking			No
10507764923	225134152	2019-02-04 16:28:27	2019-02-04 16:31:31	194.62.232.103					xxxxxxxx	33	Female			Yes		Yes		Yes					None of the above	Yes		Truly life-threatening				Everything seemed to be happening at once; or time stopped or lost all meaning	No			No			No			No, it was unpleasant				No			No
10507764660	225134152	2019-02-04 16:28:29	2019-02-04 16:30:47	49.191.12.179					xxxxxxxx	29		Male		Yes		Yes		Yes					None of the above	Yes		Truly life-threatening			Time seemed to go faster or slower than usual		No			No			No				No, it was a neutral			No			No
10507764430	225134152	2019-02-04 16:28:21	2019-02-04 16:32:38	176.58.226.179					xxxxxxxx	23		Male			No									Yes			Not truly life-threatening, but it felt like it			Everything seemed to be happening at once; or time stopped or lost all meaning	No			No			No			No, it was unpleasant				No			No
10507764427	225134152	2019-02-04 16:28:16	2019-02-04 16:30:44	91.82.50.5					xxxxxxxx	18	Female			Yes		Yes		Yes			Weakness of your arm leg, face, or half of your body				No
10507764407	225134152	2019-02-04 16:28:15	2019-02-04 16:29:39	89.20.230.80					xxxxxxxx	22		Male		Yes		Yes			No				None of the above		No
10507764391	225134152	2019-02-04 16:28:09	2019-02-04 16:28:58	62.48.251.178					xxxxxxxx	25		Male			No										No
10507764387	225134152	2019-02-04 16:28:09	2019-02-04 16:32:36	107.77.234.6					xxxxxxxx	19	Female			Yes		Yes		Yes		Numbness or tingling of your body or face				Yes		Truly life-threatening				Everything seemed to be happening at once; or time stopped or lost all meaning	No					My past flashed before me, out of my control	No			No, it was unpleasant				No			No
10507764360	225134152	2019-02-04 16:28:24	2019-02-04 16:28:51	86.25.29.209					xxxxxxxx	25		Male		Yes			No								No
10507764272	225134152	2019-02-04 16:28:19	2019-02-04 16:28:54	185.143.162.205					xxxxxxxx	33		Male			No										No
10507764264	225134152	2019-02-04 16:28:17	2019-02-04 16:29:51	92.236.38.107					xxxxxxxx	32		Male		Yes		Yes		Yes					None of the above		No
10507764249	225134152	2019-02-04 16:28:09	2019-02-04 16:29:13	86.133.73.38					xxxxxxxx	50		Male		Yes			No								No
10507764206	225134152	2019-02-04 16:28:14	2019-02-04 16:34:37	86.23.76.85					xxxxxxxx	30		Male		Yes		Yes		Yes			Weakness of your arm leg, face, or half of your body			Yes			Not truly life-threatening, but it felt like it			Everything seemed to be happening at once; or time stopped or lost all meaning			Incredibly faster		I remembered many past events		No			No, it was unpleasant				No			No
10507764182	225134152	2019-02-04 16:27:52	2019-02-04 16:30:27	94.197.120.85					xxxxxxxx	26	Female				No									Yes		Truly life-threatening				Everything seemed to be happening at once; or time stopped or lost all meaning	No			No			No					I felt relief and calmness		No			No
10507763951	225134152	2019-02-04 16:28:14	2019-02-04 16:31:20	82.36.173.156					xxxxxxxx	18		Male		Yes		Yes			No				None of the above	Yes		Truly life-threatening				Everything seemed to be happening at once; or time stopped or lost all meaning	No			No			No				No, it was a neutral			No			No
10507763701	225134152	2019-02-04 16:27:24	2019-02-04 16:29:33	90.71.97.58					xxxxxxxx	24	Female			Yes			No								No
10507763351	225134152	2019-02-04 16:27:48	2019-02-04 16:29:03	141.226.9.237					xxxxxxxx	33	Female			Yes		Yes		Yes					None of the above		No
10507763276	225134152	2019-02-04 16:27:09	2019-02-04 16:31:35	213.143.50.12					xxxxxxxx	48		Male		Yes			No								No
10507763233	225134152	2019-02-04 16:27:01	2019-02-04 16:47:27	94.254.160.63					xxxxxxxx	34	Female			Yes		Yes		Yes		Numbness or tingling of your body or face				Yes		Truly life-threatening			Time seemed to go faster or slower than usual			Faster than usual			I remembered many past events			Everything about myself or others		No, it was unpleasant				No			No
10507763079	225134152	2019-02-04 16:27:45	2019-02-04 16:29:27	95.248.139.27					xxxxxxxx	22		Male		Yes			No								No
10507763065	225134152	2019-02-04 16:27:43	2019-02-04 16:28:59	37.189.21.19					xxxxxxxx	19		Male			No										No
10507762950	225134152	2019-02-04 16:27:25	2019-02-04 16:29:03	148.63.32.70					xxxxxxxx	21	Female				No										No
10507762756	225134152	2019-02-04 16:26:58	2019-02-04 16:33:11	5.226.74.34					xxxxxxxx	23		Male		Yes		Yes			No				None of the above		No
10507762193	225134152	2019-02-04 16:27:24	2019-02-04 16:31:54	84.86.26.254					xxxxxxxx	21		Male		Yes			No							Yes			Not truly life-threatening, but it felt like it		Time seemed to go faster or slower than usual			Faster than usual		No			No			No, it was unpleasant				No			No
10507762074	225134152	2019-02-04 16:27:08	2019-02-04 16:28:42	82.15.127.52					xxxxxxxx	56	Female			Yes		Yes		Yes					None of the above		No
10507761988	225134152	2019-02-04 16:27:02	2019-02-04 16:27:56	109.117.114.198					xxxxxxxx	22		Male		Yes			No								No
10507761952	225134152	2019-02-04 16:26:48	2019-02-04 16:32:55	92.221.102.175					xxxxxxxx	22		Male		Yes		Yes			No		Weakness of your arm leg, face, or half of your body			Yes		Truly life-threatening				Everything seemed to be happening at once; or time stopped or lost all meaning	No			No			No			No, it was unpleasant				No			No
10507761848	225134152	2019-02-04 16:26:58	2019-02-04 16:28:45	143.159.157.48					xxxxxxxx	34	Female			Yes		Yes		Yes					None of the above		No
10507761846	225134152	2019-02-04 16:26:57	2019-02-04 16:28:28	95.93.154.115					xxxxxxxx	23		Male			No										No
10507761657	225134152	2019-02-04 16:26:58	2019-02-04 16:28:34	78.147.148.40					xxxxxxxx	47	Female			Yes			No							Yes			Not truly life-threatening, but it felt like it			Everything seemed to be happening at once; or time stopped or lost all meaning	No			No			No			No, it was unpleasant				No			No
10507761553	225134152	2019-02-04 16:26:59	2019-02-04 16:27:46	109.196.232.136					xxxxxxxx	18		Male			No										No
10507760823	225134152	2019-02-04 16:26:44	2019-02-04 16:29:26	2.30.8.17					xxxxxxxx	27		Male		Yes		Yes			No	Numbness or tingling of your body or face				Yes			Not truly life-threatening, but it felt like it			Everything seemed to be happening at once; or time stopped or lost all meaning		Faster than usual		No			No			No, it was unpleasant				No			No
10507760818	225134152	2019-02-04 16:26:46	2019-02-04 16:27:40	90.57.126.143					xxxxxxxx	33	Female			Yes			No								No
10507760725	225134152	2019-02-04 16:26:35	2019-02-04 16:30:23	82.33.86.120					xxxxxxxx	36	Female			Yes		Yes			No				None of the above		No
10507760665	225134152	2019-02-04 16:26:43	2019-02-04 16:27:59	85.76.115.101					xxxxxxxx	18	Female			Yes		Yes			No				None of the above		No
10507760188	225134152	2019-02-04 16:26:31	2019-02-04 16:27:13	95.245.175.242					xxxxxxxx	21		Male		Yes			No								No
10507760166	225134152	2019-02-04 16:26:27	2019-02-04 16:27:18	68.11.32.247					xxxxxxxx	32		Male			No										No
10507760150	225134152	2019-02-04 16:26:24	2019-02-04 16:27:11	134.184.254.92					xxxxxxxx	20		Male			No										No
10507759230	225134152	2019-02-04 16:25:52	2019-02-04 16:27:48	176.63.17.113					xxxxxxxx	40		Male		Yes		Yes		Yes			Weakness of your arm leg, face, or half of your body				No
10507759128	225134152	2019-02-04 16:26:02	2019-02-04 16:31:36	86.21.13.236					xxxxxxxx	38		Male		Yes		Yes			No				None of the above	Yes		Truly life-threatening		No			No			No			No				No, it was a neutral			No			No
10507758796	225134152	2019-02-04 16:25:52	2019-02-04 16:26:37	90.195.183.134					xxxxxxxx	34	Female			Yes		Yes		Yes					None of the above		No
10507758695	225134152	2019-02-04 16:25:55	2019-02-04 16:30:44	88.98.249.12					xxxxxxxx	24	Female				No									Yes		Truly life-threatening				Everything seemed to be happening at once; or time stopped or lost all meaning		Faster than usual		No			No			No, it was unpleasant				No			No
10507758610	225134152	2019-02-04 16:25:36	2019-02-04 16:27:13	90.216.134.194					xxxxxxxx	35	Female			Yes		Yes		Yes			Weakness of your arm leg, face, or half of your body				No
10507758033	225134152	2019-02-04 16:25:35	2019-02-04 16:26:34	89.181.30.31					xxxxxxxx	34		Male		Yes			No								No
10507758002	225134152	2019-02-04 16:25:09	2019-02-04 16:27:55	81.156.151.197					xxxxxxxx	31	Female				No										No
10507757886	225134152	2019-02-04 16:25:31	2019-02-04 16:26:39	46.215.41.164					xxxxxxxx	42		Male		Yes			No								No
10507757800	225134152	2019-02-04 16:25:30	2019-02-04 16:25:58	85.255.236.50					xxxxxxxx	29		Male			No										No
10507757748	225134152	2019-02-04 16:25:10	2019-02-04 16:32:29	83.52.38.61					xxxxxxxx	45	Female			Yes			No								No
10507757512	225134152	2019-02-04 16:25:14	2019-02-04 16:29:28	148.197.248.41					xxxxxxxx	20	Female				No									Yes		Truly life-threatening		No			No			No			No			No, it was unpleasant				No			No
10507757461	225134152	2019-02-04 16:24:49	2019-02-04 16:26:18	79.77.85.80					xxxxxxxx	81	Female			Yes			No								No
10507757191	225134152	2019-02-04 16:24:54	2019-02-04 16:28:16	92.0.77.118					xxxxxxxx	29		Male			No									Yes			Not truly life-threatening, but it felt like it	No				Faster than usual		No			No				No, it was a neutral			No			No
10507757172	225134152	2019-02-04 16:24:49	2019-02-04 16:26:46	151.45.140.108					xxxxxxxx	19		Male		Yes			No								No
10507757032	225134152	2019-02-04 16:24:38	2019-02-04 16:26:44	178.217.39.210					xxxxxxxx	18		Male		Yes			No								No
10507757006	225134152	2019-02-04 16:25:06	2019-02-04 16:26:23	151.227.146.86					xxxxxxxx	68	Female			Yes			No								No
10507756916	225134152	2019-02-04 16:24:55	2019-02-04 16:28:01	31.185.238.1					xxxxxxxx	52	Female			Yes		Yes		Yes					None of the above		No
10507756888	225134152	2019-02-04 16:25:05	2019-02-04 16:26:05	109.79.74.160					xxxxxxxx	21	Female			Yes			No								No
10507756809	225134152	2019-02-04 16:25:04	2019-02-04 16:25:46	5.68.47.198					xxxxxxxx	50	Female			Yes			No								No
10507756763	225134152	2019-02-04 16:24:59	2019-02-04 16:26:18	77.75.241.25					xxxxxxxx	54		Male			No										No
10507756671	225134152	2019-02-04 16:24:51	2019-02-04 16:26:33	80.114.182.60					xxxxxxxx	19		Male		Yes			No								No
10507756595	225134152	2019-02-04 16:24:59	2019-02-04 16:26:43	90.253.218.202					xxxxxxxx	25		Male			No									Yes		Truly life-threatening			Time seemed to go faster or slower than usual			Faster than usual			I remembered many past events		No			No, it was unpleasant				No			No
10507756545	225134152	2019-02-04 16:24:59	2019-02-04 16:25:53	51.9.106.91					xxxxxxxx	27	Female			Yes		Yes		Yes					None of the above		No
10507756505	225134152	2019-02-04 16:24:44	2019-02-04 16:28:26	174.88.103.42					xxxxxxxx	23		Male		Yes			No							Yes		Truly life-threatening			Time seemed to go faster or slower than usual		No			No			No				No, it was a neutral			No			No
10507756431	225134152	2019-02-04 16:24:50	2019-02-04 16:30:50	90.218.2.212					xxxxxxxx	35	Female			Yes		Yes		Yes		Numbness or tingling of your body or face				Yes			Not truly life-threatening, but it felt like it		Time seemed to go faster or slower than usual				Incredibly faster	No			No				No, it was a neutral			No			No
10507756262	225134152	2019-02-04 16:24:21	2019-02-04 16:26:16	188.76.15.25					xxxxxxxx	26		Male			No										No
10507756096	225134152	2019-02-04 16:24:44	2019-02-04 16:29:05	176.25.182.39					xxxxxxxx	27	Female			Yes			No								No
10507756022	225134152	2019-02-04 16:24:23	2019-02-04 16:26:40	83.42.162.202					xxxxxxxx	20		Male			No										No
10507755965	225134152	2019-02-04 16:24:20	2019-02-04 16:26:55	212.219.81.204					xxxxxxxx	59		Male			No										No
10507755665	225134152	2019-02-04 16:24:31	2019-02-04 16:29:52	94.62.92.116					xxxxxxxx	30	Female			Yes		Yes			No				None of the above	Yes		Truly life-threatening			Time seemed to go faster or slower than usual			Faster than usual		No			No			No, it was unpleasant				No			No
10507755489	225134152	2019-02-04 16:23:35	2019-02-04 16:34:20	195.82.102.174					xxxxxxxx	31		Male			No									Yes			Not truly life-threatening, but it felt like it		Time seemed to go faster or slower than usual		No			No			No					I felt relief and calmness		No					I felt united or one with the world
10507755353	225134152	2019-02-04 16:24:25	2019-02-04 16:26:33	87.110.180.108					xxxxxxxx	29		Male		Yes		Yes		Yes					None of the above	Yes		Truly life-threatening				Everything seemed to be happening at once; or time stopped or lost all meaning		Faster than usual		No			No			No, it was unpleasant				No			No
10507755298	225134152	2019-02-04 16:24:25	2019-02-04 16:25:36	82.38.121.41					xxxxxxxx	38	Female			Yes		Yes		Yes					None of the above		No
10507755285	225134152	2019-02-04 16:24:26	2019-02-04 16:25:20	85.210.217.138					xxxxxxxx	38	Female			Yes		Yes		Yes		Numbness or tingling of your body or face					No
10507755125	225134152	2019-02-04 16:24:12	2019-02-04 16:27:09	177.237.165.234					xxxxxxxx	21		Male		Yes			No							Yes			Not truly life-threatening, but it felt like it			Everything seemed to be happening at once; or time stopped or lost all meaning		Faster than usual		No				Everything about myself or others		No, it was unpleasant				No			No
10507754705	225134152	2019-02-04 16:24:07	2019-02-04 16:26:04	87.112.141.223					xxxxxxxx	66		Male			No									Yes		Truly life-threatening				Everything seemed to be happening at once; or time stopped or lost all meaning	No			No			No			No, it was unpleasant				No			No
10507754683	225134152	2019-02-04 16:23:50	2019-02-04 16:27:19	188.147.33.32					xxxxxxxx	45	Female			Yes		Yes		Yes					None of the above		No
10507754636	225134152	2019-02-04 16:23:58	2019-02-04 16:25:20	82.40.196.174					xxxxxxxx	30	Female			Yes		Yes			No				None of the above		No
10507754425	225134152	2019-02-04 16:24:00	2019-02-04 16:25:02	78.54.162.233					xxxxxxxx	43		Male			No										No
10507754327	225134152	2019-02-04 16:23:59	2019-02-04 16:25:23	158.49.245.29					xxxxxxxx	41		Male		Yes			No								No
10507754067	225134152	2019-02-04 16:23:53	2019-02-04 16:25:07	151.229.112.183					xxxxxxxx	31	Female			Yes			No								No
10507753865	225134152	2019-02-04 16:23:50	2019-02-04 16:25:30	84.89.157.31					xxxxxxxx	29		Male			No									Yes		Truly life-threatening		No					Incredibly faster	No			No						I felt incredible peace or pleasantness			Incredible joy	No
10507753851	225134152	2019-02-04 16:23:43	2019-02-04 16:27:11	82.13.29.80					xxxxxxxx	36	Female			Yes		Yes		Yes					None of the above	Yes		Truly life-threatening				Everything seemed to be happening at once; or time stopped or lost all meaning	No				I remembered many past events		No			No, it was unpleasant				No			No
10507753768	225134152	2019-02-04 16:23:40	2019-02-04 16:27:40	90.252.36.94					xxxxxxxx	30	Female			Yes		Yes		Yes		Numbness or tingling of your body or face				Yes		Truly life-threatening			Time seemed to go faster or slower than usual			Faster than usual			I remembered many past events			Everything about myself or others			No, it was a neutral				Happiness		No
10507753654	225134152	2019-02-04 16:23:44	2019-02-04 16:26:59	2.82.36.8					xxxxxxxx	20		Male			No									Yes			Not truly life-threatening, but it felt like it			Everything seemed to be happening at once; or time stopped or lost all meaning		Faster than usual				My past flashed before me, out of my control		Everything about myself or others		No, it was unpleasant				No			No
10507753230	225134152	2019-02-04 16:23:15	2019-02-04 16:24:36	147.147.16.224					xxxxxxxx	34	Female				No										No
10507753224	225134152	2019-02-04 16:23:30	2019-02-04 16:24:43	93.32.75.4					xxxxxxxx	24		Male		Yes			No								No
10507752998	225134152	2019-02-04 16:23:10	2019-02-04 16:25:57	82.154.225.93					xxxxxxxx	35		Male		Yes			No								No
10507752957	225134152	2019-02-04 16:23:22	2019-02-04 16:25:22	5.151.28.224					xxxxxxxx	19	Female			Yes		Yes		Yes		Numbness or tingling of your body or face					No
10507752803	225134152	2019-02-04 16:23:02	2019-02-04 16:25:09	95.239.213.55					xxxxxxxx	54	Female			Yes			No								No
10507752618	225134152	2019-02-04 16:23:08	2019-02-04 16:33:59	46.139.219.88					xxxxxxxx	54		Male		Yes			No							Yes			Not truly life-threatening, but it felt like it		Time seemed to go faster or slower than usual			Faster than usual			I remembered many past events				Everything about the universe				I felt incredible peace or pleasantness		Happiness				I felt united or one with the world
10507752489	225134152	2019-02-04 16:23:02	2019-02-04 16:24:08	172.58.99.89					xxxxxxxx	57	Female			Yes		Yes			No				None of the above		No
10507752365	225134152	2019-02-04 16:22:44	2019-02-04 16:25:09	109.243.186.105					xxxxxxxx	21		Male			No										No
10507751578	225134152	2019-02-04 16:22:53	2019-02-04 16:23:40	90.252.197.30					xxxxxxxx	37	Female			Yes			No								No
10507751483	225134152	2019-02-04 16:22:55	2019-02-04 16:23:19	138.38.161.155					xxxxxxxx	35		Male		Yes			No								No
10507751377	225134152	2019-02-04 16:22:13	2019-02-04 16:28:40	81.198.65.206					xxxxxxxx	33		Male		Yes		Yes			No		Weakness of your arm leg, face, or half of your body			Yes		Truly life-threatening			Time seemed to go faster or slower than usual				Incredibly faster	No			No					I felt relief and calmness		No			No
10507751124	225134152	2019-02-04 16:22:38	2019-02-04 16:23:12	86.164.125.122					xxxxxxxx	32	Female			Yes			No								No
10507750938	225134152	2019-02-04 16:22:33	2019-02-04 16:23:24	31.51.233.234					xxxxxxxx	67		Male		Yes			No								No
10507750591	225134152	2019-02-04 16:21:54	2019-02-04 16:24:10	94.37.208.29					xxxxxxxx	24	Female			Yes		Yes		Yes		Numbness or tingling of your body or face					No
10507750162	225134152	2019-02-04 16:22:09	2019-02-04 16:23:58	194.26.23.245					xxxxxxxx	26	Female			Yes		Yes		Yes					None of the above		No
10507750095	225134152	2019-02-04 16:22:13	2019-02-04 16:24:15	97.100.119.38					xxxxxxxx	40	Female			Yes		Yes		Yes					None of the above	Yes		Truly life-threatening				Everything seemed to be happening at once; or time stopped or lost all meaning	No			No			No			No, it was unpleasant				No			No
10507749951	225134152	2019-02-04 16:22:06	2019-02-04 16:23:03	90.37.135.250					xxxxxxxx	45	Female			Yes		Yes			No				None of the above		No
10507749214	225134152	2019-02-04 16:21:51	2019-02-04 16:22:50	81.84.31.12					xxxxxxxx	20		Male		Yes			No								No
10507748339	225134152	2019-02-04 16:21:30	2019-02-04 16:22:25	125.209.149.80					xxxxxxxx	18		Male		Yes			No								No
10507747816	225134152	2019-02-04 16:21:16	2019-02-04 16:25:45	46.109.215.147					xxxxxxxx	26	Female			Yes			No							Yes		Truly life-threatening				Everything seemed to be happening at once; or time stopped or lost all meaning	No			No			No					I felt relief and calmness		No			No
10507747795	225134152	2019-02-04 16:21:17	2019-02-04 16:21:54	185.38.43.31					xxxxxxxx	20		Male			No										No
10507747692	225134152	2019-02-04 16:21:14	2019-02-04 16:22:02	137.44.100.1					xxxxxxxx	45	Female				No										No
10507747524	225134152	2019-02-04 16:21:08	2019-02-04 16:25:44	185.95.199.6					xxxxxxxx	18		Male		Yes			No								No
10507747352	225134152	2019-02-04 16:20:06	2019-02-04 16:22:32	79.33.82.192					xxxxxxxx	54	Female				No										No
10507747205	225134152	2019-02-04 16:20:59	2019-02-04 16:23:03	81.107.233.183					xxxxxxxx	54		Male			No										No
10507746527	225134152	2019-02-04 16:19:51	2019-02-04 16:21:56	83.61.139.8					xxxxxxxx	71	Female				No										No
10507746524	225134152	2019-02-04 16:20:42	2019-02-04 16:22:18	178.7.163.15					xxxxxxxx	18	Female				No									Yes		Truly life-threatening				Everything seemed to be happening at once; or time stopped or lost all meaning	No			No			No			No, it was unpleasant				No			No
10507746461	225134152	2019-02-04 16:20:45	2019-02-04 16:24:49	87.202.64.105					xxxxxxxx	25		Male		Yes		Yes		Yes					None of the above	Yes		Truly life-threatening			Time seemed to go faster or slower than usual			Faster than usual		No			No					I felt relief and calmness		No			No
10507746444	225134152	2019-02-04 16:20:41	2019-02-04 16:21:21	82.35.195.113					xxxxxxxx	31		Male			No										No
10507746343	225134152	2019-02-04 16:20:28	2019-02-04 16:22:51	89.168.199.33					xxxxxxxx	54		Male		Yes			No								No
10507746201	225134152	2019-02-04 16:20:34	2019-02-04 16:22:07	157.52.14.240					xxxxxxxx	28		Male		Yes			No								No
10507746097	225134152	2019-02-04 16:20:26	2019-02-04 16:24:52	92.19.161.101					xxxxxxxx	29	Female				No									Yes		Truly life-threatening			Time seemed to go faster or slower than usual		No			No				Everything about myself or others			No, it was a neutral			No			No
10507746002	225134152	2019-02-04 16:20:36	2019-02-04 16:22:20	66.183.115.222					xxxxxxxx	33		Male		Yes		Yes		Yes					None of the above	Yes			Not truly life-threatening, but it felt like it		Time seemed to go faster or slower than usual				Incredibly faster	No			No			No, it was unpleasant				No			No
10507745853	225134152	2019-02-04 16:20:27	2019-02-04 16:22:24	85.219.67.162					xxxxxxxx	26		Male		Yes			No							Yes		Truly life-threatening				Everything seemed to be happening at once; or time stopped or lost all meaning	No			No			No					I felt relief and calmness		No			No
10507745773	225134152	2019-02-04 16:20:27	2019-02-04 16:23:06	194.83.161.10					xxxxxxxx	35	Female			Yes			No							Yes		Truly life-threatening			Time seemed to go faster or slower than usual		No			No			No			No, it was unpleasant				No			No
10507745759	225134152	2019-02-04 16:20:24	2019-02-04 16:25:24	5.173.32.101					xxxxxxxx	20		Male		Yes		Yes		Yes		Numbness or tingling of your body or face				Yes		Truly life-threatening				Everything seemed to be happening at once; or time stopped or lost all meaning			Incredibly faster	No				Everything about myself or others				I felt relief and calmness		No			No
10507745723	225134152	2019-02-04 16:19:58	2019-02-04 16:54:29	78.193.164.51					xxxxxxxx	38	Female			Yes		Yes		Yes				Difficulty speaking		Yes		Truly life-threatening				Everything seemed to be happening at once; or time stopped or lost all meaning		Faster than usual				My past flashed before me, out of my control		Everything about myself or others					I felt incredible peace or pleasantness			Incredible joy			I felt united or one with the world
10507745250	225134152	2019-02-04 16:20:15	2019-02-04 16:21:57	193.60.182.97					xxxxxxxx	21	Female			Yes		Yes		Yes					None of the above		No
10507745170	225134152	2019-02-04 16:20:00	2019-02-04 16:21:31	78.217.123.160					xxxxxxxx	27	Female			Yes			No								No
10507745028	225134152	2019-02-04 16:19:48	2019-02-04 16:21:04	87.208.17.36					xxxxxxxx	28		Male			No										No
10507745009	225134152	2019-02-04 16:20:12	2019-02-04 16:22:59	81.92.200.154					xxxxxxxx	25		Male		Yes		Yes		Yes					None of the above	Yes		Truly life-threatening				Everything seemed to be happening at once; or time stopped or lost all meaning		Faster than usual		No			No					I felt relief and calmness		No			No
10507744965	225134152	2019-02-04 16:19:59	2019-02-04 16:20:46	84.249.105.142					xxxxxxxx	20		Male		Yes			No								No
10507744646	225134152	2019-02-04 16:19:54	2019-02-04 16:21:19	176.184.138.39					xxxxxxxx	18		Male		Yes		Yes			No			Difficulty speaking			No
10507744400	225134152	2019-02-04 16:19:41	2019-02-04 16:23:08	5.102.18.233					xxxxxxxx	43	Female			Yes			No								No
10507743915	225134152	2019-02-04 16:19:28	2019-02-04 16:23:27	37.228.250.8					xxxxxxxx	53	Female			Yes			No							Yes			Not truly life-threatening, but it felt like it		Time seemed to go faster or slower than usual			Faster than usual			I remembered many past events		No			No, it was unpleasant				No			No
10507743757	225134152	2019-02-04 16:19:26	2019-02-04 16:21:19	2.25.245.252					xxxxxxxx	46	Female			Yes		Yes		Yes					None of the above		No
10507743476	225134152	2019-02-04 16:15:31	2019-02-04 16:20:16	91.161.182.25					xxxxxxxx	18		Male		Yes			No								No
10507743374	225134152	2019-02-04 16:19:24	2019-02-04 16:21:44	92.176.206.90					xxxxxxxx	25	Female			Yes		Yes		Yes		Numbness or tingling of your body or face					No
10507743029	225134152	2019-02-04 16:19:19	2019-02-04 16:22:18	94.110.185.31					xxxxxxxx	18		Male		Yes		Yes		Yes			Weakness of your arm leg, face, or half of your body			Yes		Truly life-threatening				Everything seemed to be happening at once; or time stopped or lost all meaning	No			No			No			No, it was unpleasant				No			No
10507742950	225134152	2019-02-04 16:19:18	2019-02-04 16:20:29	81.82.139.112					xxxxxxxx	19		Male			No										No
10507742910	225134152	2019-02-04 16:19:24	2019-02-04 16:20:17	24.97.191.30					xxxxxxxx	23		Male		Yes		Yes			No				None of the above		No
10507742882	225134152	2019-02-04 16:19:18	2019-02-04 16:20:00	24.34.197.210					xxxxxxxx	22	Female			Yes			No								No
10507742834	225134152	2019-02-04 16:19:16	2019-02-04 16:20:58	62.7.59.49					xxxxxxxx	56		Male		Yes			No							Yes			Not truly life-threatening, but it felt like it		Time seemed to go faster or slower than usual		No			No			No			No, it was unpleasant				No			No
10507742670	225134152	2019-02-04 16:19:16	2019-02-04 16:20:02	89.115.229.142					xxxxxxxx	34		Male		Yes			No								No
10507742630	225134152	2019-02-04 16:19:07	2019-02-04 16:21:14	87.202.162.127					xxxxxxxx	37	Female			Yes		Yes		Yes		Numbness or tingling of your body or face					No
10507742179	225134152	2019-02-04 16:18:28	2019-02-04 16:20:18	31.185.173.219					xxxxxxxx	73	Female				No										No
10507742083	225134152	2019-02-04 16:18:46	2019-02-04 16:22:02	192.162.172.55					xxxxxxxx	38		Male		Yes			No								No
10507741949	225134152	2019-02-04 16:18:54	2019-02-04 16:20:20	89.114.24.19					xxxxxxxx	25		Male			No										No
10507741941	225134152	2019-02-04 16:18:51	2019-02-04 16:22:25	90.253.115.125					xxxxxxxx	30	Female			Yes		Yes			No			Difficulty speaking		Yes			Not truly life-threatening, but it felt like it		Time seemed to go faster or slower than usual		No			No				Everything about myself or others				I felt relief and calmness		No				I felt no longer in conflict with nature
10507741805	225134152	2019-02-04 16:18:49	2019-02-04 16:20:02	194.80.232.24					xxxxxxxx	22		Male			No										No
10507741426	225134152	2019-02-04 16:18:33	2019-02-04 16:20:09	87.205.164.100					xxxxxxxx	30	Female				No										No
10507741268	225134152	2019-02-04 16:18:43	2019-02-04 16:20:28	82.71.8.22					xxxxxxxx	25	Female			Yes			No								No
10507741224	225134152	2019-02-04 16:18:27	2019-02-04 16:19:36	82.2.86.104					xxxxxxxx	27		Male		Yes			No								No
10507740992	225134152	2019-02-04 16:18:25	2019-02-04 16:21:40	83.8.205.224					xxxxxxxx	21		Male		Yes		Yes			No				None of the above	Yes		Truly life-threatening			Time seemed to go faster or slower than usual				Incredibly faster	No				Everything about myself or others			No, it was a neutral				Happiness			I felt no longer in conflict with nature
10507740520	225134152	2019-02-04 16:18:14	2019-02-04 16:18:59	90.241.168.33					xxxxxxxx	63	Female				No										No
10507740341	225134152	2019-02-04 16:18:10	2019-02-04 16:21:12	192.75.158.166					xxxxxxxx	27	Female			Yes		Yes		Yes					None of the above		No
10507740335	225134152	2019-02-04 16:18:06	2019-02-04 16:18:58	86.191.115.148					xxxxxxxx	38	Female			Yes			No								No
10507740239	225134152	2019-02-04 16:17:43	2019-02-04 16:18:56	92.25.147.140					xxxxxxxx	72		Male			No										No
10507740236	225134152	2019-02-04 16:18:14	2019-02-04 16:19:29	37.190.227.164					xxxxxxxx	21		Male			No										No
10507740170	225134152	2019-02-04 16:18:09	2019-02-04 16:19:57	78.92.35.4					xxxxxxxx	23		Male		Yes		Yes			No				None of the above		No
10507740055	225134152	2019-02-04 16:18:11	2019-02-04 16:21:29	77.225.22.68					xxxxxxxx	51		Male		Yes			No							Yes			Not truly life-threatening, but it felt like it		Time seemed to go faster or slower than usual		No			No			No					I felt relief and calmness		No			No
10507739991	225134152	2019-02-04 16:18:15	2019-02-04 16:19:01	51.148.68.19					xxxxxxxx	20		Male		Yes			No								No
10507739894	225134152	2019-02-04 16:18:07	2019-02-04 16:19:07	94.39.119.13					xxxxxxxx	23		Male			No										No
10507739844	225134152	2019-02-04 16:17:50	2019-02-04 16:19:46	82.59.65.6					xxxxxxxx	44		Male		Yes		Yes		Yes			Weakness of your arm leg, face, or half of your body			Yes		Truly life-threatening			Time seemed to go faster or slower than usual			Faster than usual			I remembered many past events		No					I felt relief and calmness			Happiness			I felt no longer in conflict with nature
10507739556	225134152	2019-02-04 16:17:57	2019-02-04 16:19:09	92.140.194.22					xxxxxxxx	21	Female				No										No
10507739460	225134152	2019-02-04 16:17:53	2019-02-04 16:19:37	92.22.218.222					xxxxxxxx	21	Female			Yes		Yes		Yes		Numbness or tingling of your body or face				Yes		Truly life-threatening			Time seemed to go faster or slower than usual				Incredibly faster	No				Everything about myself or others				I felt relief and calmness		No				I felt no longer in conflict with nature
10507739134	225134152	2019-02-04 16:17:47	2019-02-04 16:20:04	93.57.28.231					xxxxxxxx	52		Male		Yes			No								No
10507739043	225134152	2019-02-04 16:17:35	2019-02-04 16:20:50	5.173.160.183					xxxxxxxx	28	Female			Yes		Yes		Yes					None of the above		No
10507738592	225134152	2019-02-04 16:17:33	2019-02-04 16:18:31	2.36.228.239					xxxxxxxx	38		Male		Yes			No								No
10507738141	225134152	2019-02-04 16:17:20	2019-02-04 16:18:38	90.210.123.97					xxxxxxxx	40	Female			Yes		Yes			No	Numbness or tingling of your body or face					No
10507737606	225134152	2019-02-04 16:17:11	2019-02-04 16:18:37	151.231.7.191					xxxxxxxx	36	Female			Yes			No								No
10507737444	225134152	2019-02-04 16:17:12	2019-02-04 16:17:44	90.156.73.171					xxxxxxxx	20		Male			No										No
10507737117	225134152	2019-02-04 16:16:54	2019-02-04 16:18:02	213.192.68.1					xxxxxxxx	33		Male		Yes			No								No
10507737071	225134152	2019-02-04 16:16:46	2019-02-04 16:17:31	80.6.30.33					xxxxxxxx	22	Female			Yes			No								No
10507736608	225134152	2019-02-04 16:16:41	2019-02-04 16:18:11	94.69.95.172					xxxxxxxx	19		Male		Yes		Yes		Yes			Weakness of your arm leg, face, or half of your body				No
10507736335	225134152	2019-02-04 16:16:11	2019-02-04 16:23:46	188.147.64.248					xxxxxxxx	20		Male		Yes			No								No
10507736308	225134152	2019-02-04 16:16:39	2019-02-04 16:17:32	89.183.92.8					xxxxxxxx	24		Male		Yes		Yes		Yes					None of the above		No
10507736306	225134152	2019-02-04 16:16:34	2019-02-04 16:18:07	90.206.116.72					xxxxxxxx	28	Female			Yes			No								No
10507736053	225134152	2019-02-04 16:16:30	2019-02-04 16:18:52	217.198.210.62					xxxxxxxx	21		Male		Yes		Yes			No				None of the above		No
10507735977	225134152	2019-02-04 16:15:56	2019-02-04 16:16:43	92.25.147.140					xxxxxxxx	72		Male
10507735973	225134152	2019-02-04 16:16:26	2019-02-04 16:18:54	37.248.213.225					xxxxxxxx	24		Male		Yes		Yes		Yes			Weakness of your arm leg, face, or half of your body				No
10507735583	225134152	2019-02-04 16:16:09	2019-02-04 16:18:39	84.206.50.98					xxxxxxxx	34		Male		Yes		Yes			No				None of the above		No
10507735439	225134152	2019-02-04 16:16:10	2019-02-04 16:16:53	148.197.248.58					xxxxxxxx	22		Male			No										No
10507735018	225134152	2019-02-04 16:15:58	2019-02-04 16:18:09	86.137.109.214					xxxxxxxx	23		Male		Yes		Yes		Yes		Numbness or tingling of your body or face				Yes		Truly life-threatening			Time seemed to go faster or slower than usual				Incredibly faster	No			No			No, it was unpleasant				No			No
10507734987	225134152	2019-02-04 16:16:00	2019-02-04 16:16:40	90.222.33.202					xxxxxxxx	30	Female			Yes			No								No
10507734923	225134152	2019-02-04 16:15:46	2019-02-04 16:17:26	82.177.224.83					xxxxxxxx	41	Female			Yes		Yes			No				None of the above		No
10507734915	225134152	2019-02-04 16:13:41	2019-02-04 16:17:02	99.89.53.249					xxxxxxxx	40		Male			No										No
10507734854	225134152	2019-02-04 16:15:28	2019-02-04 16:19:48	148.252.128.61					xxxxxxxx	37	Female			Yes			No								No
10507734502	225134152	2019-02-04 16:15:39	2019-02-04 16:18:50	148.69.8.116					xxxxxxxx	23	Female			Yes		Yes		Yes					None of the above		No
10507734012	225134152	2019-02-04 16:15:40	2019-02-04 16:16:16	74.217.93.204					xxxxxxxx	34		Male			No										No
10507733982	225134152	2019-02-04 16:15:43	2019-02-04 16:16:29	91.206.177.7					xxxxxxxx	31	Female			Yes		Yes		Yes					None of the above		No
10507733944	225134152	2019-02-04 16:15:22	2019-02-04 16:17:58	95.244.61.53					xxxxxxxx	25	Female				No										No
10507733649	225134152	2019-02-04 16:14:07	2019-02-04 16:17:16	188.146.229.42					xxxxxxxx	31		Male			No										No
10507733513	225134152	2019-02-04 16:15:15	2019-02-04 16:18:14	94.34.220.127					xxxxxxxx	24		Male			No										No
10507733174	225134152	2019-02-04 16:15:15	2019-02-04 16:15:49	191.119.217.128					xxxxxxxx	20		Male			No										No
10507733121	225134152	2019-02-04 16:15:05	2019-02-04 16:19:32	83.185.245.35					xxxxxxxx	30	Female			Yes		Yes			No				None of the above	Yes			Not truly life-threatening, but it felt like it			Everything seemed to be happening at once; or time stopped or lost all meaning	No			No					Everything about the universe				I felt incredible peace or pleasantness			Incredible joy			I felt united or one with the world
10507732906	225134152	2019-02-04 16:15:01	2019-02-04 16:16:03	82.132.233.39					xxxxxxxx	31		Male			No										No
10507732829	225134152	2019-02-04 16:15:11	2019-02-04 16:18:44	65.191.254.253					xxxxxxxx	24		Male		Yes			No							Yes		Truly life-threatening			Time seemed to go faster or slower than usual			Faster than usual			I remembered many past events		No					I felt relief and calmness		No			No
10507732643	225134152	2019-02-04 16:14:45	2019-02-04 16:17:18	2.27.255.193					xxxxxxxx	44	Female			Yes			No							Yes		Truly life-threatening				Everything seemed to be happening at once; or time stopped or lost all meaning		Faster than usual			I remembered many past events			Everything about myself or others				I felt relief and calmness		No				I felt no longer in conflict with nature
10507732522	225134152	2019-02-04 16:14:55	2019-02-04 16:19:40	195.249.189.252					xxxxxxxx	22		Male		Yes		Yes			No				None of the above	Yes		Truly life-threatening			Time seemed to go faster or slower than usual			Faster than usual		No			No			No, it was unpleasant				No			No
10507732464	225134152	2019-02-04 16:14:58	2019-02-04 16:16:36	151.55.108.155					xxxxxxxx	28		Male			No										No
10507732225	225134152	2019-02-04 16:14:53	2019-02-04 16:15:43	31.49.0.139					xxxxxxxx	62	Female			Yes			No								No
10507732069	225134152	2019-02-04 16:14:49	2019-02-04 16:15:41	94.66.59.140					xxxxxxxx	21		Male		Yes		Yes			No				None of the above		No
10507731991	225134152	2019-02-04 16:14:45	2019-02-04 16:15:55	80.194.122.75					xxxxxxxx	37	Female			Yes		Yes		Yes		Numbness or tingling of your body or face					No
10507731733	225134152	2019-02-04 16:14:44	2019-02-04 16:15:51	81.129.62.173					xxxxxxxx	47	Female			Yes		Yes		Yes				Difficulty speaking			No
10507731660	225134152	2019-02-04 16:14:39	2019-02-04 16:17:20	87.214.75.158					xxxxxxxx	28	Female			Yes			No								No
10507731638	225134152	2019-02-04 16:14:42	2019-02-04 16:15:08	193.84.225.250					xxxxxxxx	50	Female				No										No
10507731546	225134152	2019-02-04 16:14:31	2019-02-04 16:15:34	81.108.146.230					xxxxxxxx	18	Female			Yes			No								No
10507731360	225134152	2019-02-04 16:14:32	2019-02-04 16:15:22	151.226.0.73					xxxxxxxx	37	Female			Yes			No								No
10507731352	225134152	2019-02-04 16:14:28	2019-02-04 16:15:07	86.12.188.77					xxxxxxxx	26		Male			No										No
10507731217	225134152	2019-02-04 16:13:55	2019-02-04 16:14:41	92.25.147.140					xxxxxxxx	72		Male
10507730945	225134152	2019-02-04 16:14:02	2019-02-04 16:15:40	90.199.162.114					xxxxxxxx	31	Female			Yes		Yes			No				None of the above		No
10507730912	225134152	2019-02-04 16:14:17	2019-02-04 16:17:10	46.50.5.8					xxxxxxxx	24		Male		Yes			No								No
10507730889	225134152	2019-02-04 16:14:20	2019-02-04 16:19:00	148.71.40.6					xxxxxxxx	23		Male			No									Yes		Truly life-threatening		No			No			No			No			No, it was unpleasant				No			No
10507730430	225134152	2019-02-04 16:14:02	2019-02-04 16:14:38	5.68.97.35					xxxxxxxx	30	Female				No										No
10507730426	225134152	2019-02-04 16:14:14	2019-02-04 16:16:02	195.25.229.121					xxxxxxxx	27		Male		Yes		Yes		Yes		Numbness or tingling of your body or face					No
10507730366	225134152	2019-02-04 16:14:10	2019-02-04 16:16:04	92.24.86.188					xxxxxxxx	22	Female			Yes		Yes			No				None of the above		No
10507730093	225134152	2019-02-04 16:13:57	2019-02-04 16:14:54	86.131.251.39					xxxxxxxx	62		Male			No										No
10507730087	225134152	2019-02-04 16:13:41	2019-02-04 16:15:58	176.25.208.166					xxxxxxxx	47	Female			Yes		Yes		Yes					None of the above		No
10507729800	225134152	2019-02-04 16:13:43	2019-02-04 16:14:37	5.64.124.233					xxxxxxxx	19	Female				No										No
10507728986	225134152	2019-02-04 16:13:27	2019-02-04 16:14:20	86.139.56.149					xxxxxxxx	39	Female			Yes			No								No
10507728949	225134152	2019-02-04 16:13:26	2019-02-04 16:14:34	194.207.77.133					xxxxxxxx	38	Female			Yes			No								No
10507727603	225134152	2019-02-04 16:12:47	2019-02-04 16:13:52	173.238.177.33					xxxxxxxx	43	Female			Yes		Yes		Yes					None of the above		No
10507727516	225134152	2019-02-04 16:12:53	2019-02-04 16:13:57	2.98.120.247					xxxxxxxx	36	Female				No										No
10507727323	225134152	2019-02-04 16:12:42	2019-02-04 16:14:38	82.8.0.148					xxxxxxxx	29	Female			Yes			No								No
10507726596	225134152	2019-02-04 16:11:47	2019-02-04 16:14:25	189.130.129.27					xxxxxxxx	19		Male			No										No
10507726517	225134152	2019-02-04 16:12:31	2019-02-04 16:13:16	109.156.6.107					xxxxxxxx	22	Female				No										No
10507726427	225134152	2019-02-04 16:12:24	2019-02-04 16:13:08	88.107.49.166					xxxxxxxx	41	Female			Yes			No								No
10507726036	225134152	2019-02-04 16:11:58	2019-02-04 16:13:50	193.137.92.241					xxxxxxxx	22	Female			Yes		Yes			No				None of the above		No
10507725242	225134152	2019-02-04 16:11:50	2019-02-04 16:18:48	194.210.255.214					xxxxxxxx	20		Male		Yes			No							Yes		Truly life-threatening			Time seemed to go faster or slower than usual				Incredibly faster	No			No			No, it was unpleasant				No			No
10507725184	225134152	2019-02-04 16:11:44	2019-02-04 16:16:21	188.146.50.57					xxxxxxxx	19		Male		Yes			No							Yes		Truly life-threatening			Time seemed to go faster or slower than usual			Faster than usual				My past flashed before me, out of my control	No			No, it was unpleasant				No			No
10507724633	225134152	2019-02-04 16:11:08	2019-02-04 16:16:38	193.136.33.100					xxxxxxxx	23		Male			No									Yes		Truly life-threatening			Time seemed to go faster or slower than usual		No			No			No			No, it was unpleasant				No			No
10507724389	225134152	2019-02-04 16:11:27	2019-02-04 16:13:42	50.224.111.74					xxxxxxxx	43		Male		Yes		Yes		Yes			Weakness of your arm leg, face, or half of your body			Yes			Not truly life-threatening, but it felt like it		Time seemed to go faster or slower than usual			Faster than usual				My past flashed before me, out of my control	No				No, it was a neutral			No			No
10507724142	225134152	2019-02-04 16:11:23	2019-02-04 16:11:57	129.7.0.10					xxxxxxxx	20		Male			No										No
10507723617	225134152	2019-02-04 16:11:01	2019-02-04 16:11:58	193.137.168.16					xxxxxxxx	26	Female			Yes			No								No
10507723485	225134152	2019-02-04 16:11:01	2019-02-04 16:12:27	86.144.201.233					xxxxxxxx	40	Female			Yes		Yes			No				None of the above		No
10507723264	225134152	2019-02-04 16:10:53	2019-02-04 16:13:40	85.255.233.225					xxxxxxxx	18	Female			Yes			No								No
10507722521	225134152	2019-02-04 16:10:43	2019-02-04 16:12:23	178.48.21.181					xxxxxxxx	27		Male			No										No
10507722463	225134152	2019-02-04 16:10:30	2019-02-04 16:12:23	90.221.95.145					xxxxxxxx	42	Female				No										No
10507722235	225134152	2019-02-04 16:10:30	2019-02-04 16:11:23	212.180.202.51					xxxxxxxx	23		Male			No										No
10507721993	225134152	2019-02-04 16:09:53	2019-02-04 16:12:15	108.183.32.114					xxxxxxxx	30		Male		Yes		Yes			No				None of the above		No
10507721479	225134152	2019-02-04 16:10:09	2019-02-04 16:13:26	86.0.232.188					xxxxxxxx	48		Male			No									Yes		Truly life-threatening			Time seemed to go faster or slower than usual		No			No			No			No, it was unpleasant				No			No
10507720965	225134152	2019-02-04 16:09:59	2019-02-04 16:12:30	82.28.20.191					xxxxxxxx	33	Female			Yes		Yes		Yes		Numbness or tingling of your body or face				Yes			Not truly life-threatening, but it felt like it			Everything seemed to be happening at once; or time stopped or lost all meaning			Incredibly faster			My past flashed before me, out of my control	No					I felt relief and calmness			Happiness			I felt no longer in conflict with nature
10507720713	225134152	2019-02-04 16:09:52	2019-02-04 16:10:58	82.36.25.72					xxxxxxxx	38	Female			Yes		Yes			No				None of the above		No
10507720429	225134152	2019-02-04 16:09:26	2019-02-04 16:10:38	213.22.25.226					xxxxxxxx	21	Female			Yes			No								No
10507720185	225134152	2019-02-04 16:09:43	2019-02-04 16:11:16	151.226.228.142					xxxxxxxx	44		Male		Yes		Yes		Yes					None of the above	Yes			Not truly life-threatening, but it felt like it			Everything seemed to be happening at once; or time stopped or lost all meaning		Faster than usual			I remembered many past events		No			No, it was unpleasant				No			No
10507720069	225134152	2019-02-04 16:09:31	2019-02-04 16:11:14	185.101.177.77					xxxxxxxx	25	Female				No										No
10507719913	225134152	2019-02-04 16:09:33	2019-02-04 16:10:20	217.33.207.226					xxxxxxxx	25		Male		Yes			No								No
10507719340	225134152	2019-02-04 16:09:23	2019-02-04 16:10:16	147.188.254.135					xxxxxxxx	23	Female				No										No
10507719221	225134152	2019-02-04 16:09:11	2019-02-04 16:12:48	193.136.33.102					xxxxxxxx	19		Male		Yes		Yes			No				None of the above	Yes		Truly life-threatening				Everything seemed to be happening at once; or time stopped or lost all meaning			Incredibly faster	No			No			No, it was unpleasant				No			No
10507719203	225134152	2019-02-04 16:08:58	2019-02-04 16:10:42	94.193.86.19					xxxxxxxx	40	Female			Yes		Yes		Yes					None of the above		No
10507718804	225134152	2019-02-04 16:09:09	2019-02-04 16:09:55	87.146.44.43					xxxxxxxx	30	Female			Yes		Yes			No				None of the above		No
10507718791	225134152	2019-02-04 16:08:39	2019-02-04 16:10:20	82.31.184.90					xxxxxxxx	38	Female				No										No
10507718459	225134152	2019-02-04 16:08:59	2019-02-04 16:09:52	94.251.215.202					xxxxxxxx	19		Male		Yes			No								No
10507718165	225134152	2019-02-04 16:08:37	2019-02-04 16:09:50	217.104.113.175					xxxxxxxx	41		Male			No										No
10507717627	225134152	2019-02-04 16:08:29	2019-02-04 16:13:41	89.152.162.150					xxxxxxxx	28	Female			Yes		Yes		Yes					None of the above	Yes		Truly life-threatening				Everything seemed to be happening at once; or time stopped or lost all meaning		Faster than usual			I remembered many past events		No			No, it was unpleasant				No			No
10507717427	225134152	2019-02-04 16:07:47	2019-02-04 16:17:48	93.103.69.163					xxxxxxxx	22	Female			Yes		Yes		Yes			Weakness of your arm leg, face, or half of your body			Yes			Not truly life-threatening, but it felt like it			Everything seemed to be happening at once; or time stopped or lost all meaning			Incredibly faster	No			No			No, it was unpleasant				No			No
10507717411	225134152	2019-02-04 16:08:01	2019-02-04 16:09:04	94.119.64.15					xxxxxxxx	19	Female			Yes			No								No
10507717075	225134152	2019-02-04 16:08:10	2019-02-04 16:13:47	134.19.126.191					xxxxxxxx	55	Female			Yes		Yes			No				None of the above	Yes		Truly life-threatening			Time seemed to go faster or slower than usual		No			No			No			No, it was unpleasant				No			No
10507717042	225134152	2019-02-04 16:08:16	2019-02-04 16:09:13	81.193.211.221					xxxxxxxx	20		Male		Yes			No								No
10507716718	225134152	2019-02-04 16:08:17	2019-02-04 16:08:59	195.234.134.115					xxxxxxxx	33		Male		Yes			No								No
10507716599	225134152	2019-02-04 16:08:01	2019-02-04 16:20:29	130.104.179.114					xxxxxxxx	34		Male		Yes			No							Yes			Not truly life-threatening, but it felt like it		Time seemed to go faster or slower than usual			Faster than usual		No				Everything about myself or others					I felt incredible peace or pleasantness	No				I felt no longer in conflict with nature
10507716494	225134152	2019-02-04 16:08:03	2019-02-04 16:12:00	2.40.7.34					xxxxxxxx	34		Male		Yes		Yes		Yes					None of the above		No
10507716489	225134152	2019-02-04 16:07:54	2019-02-04 16:09:55	87.17.141.116					xxxxxxxx	19		Male		Yes		Yes		Yes					None of the above		No
10507716467	225134152	2019-02-04 16:07:52	2019-02-04 16:12:25	88.157.46.100					xxxxxxxx	20	Female			Yes			No								No
10507716424	225134152	2019-02-04 16:08:05	2019-02-04 16:08:36	79.23.59.171					xxxxxxxx	32		Male			No										No
10507716260	225134152	2019-02-04 16:07:55	2019-02-04 16:08:45	143.50.34.98					xxxxxxxx	23		Male			No										No
10507716142	225134152	2019-02-04 16:07:57	2019-02-04 16:09:25	81.103.26.68					xxxxxxxx	19		Male			No										No
10507716113	225134152	2019-02-04 16:07:51	2019-02-04 16:08:49	82.72.252.96					xxxxxxxx	25	Female				No										No
10507716048	225134152	2019-02-04 16:07:33	2019-02-04 16:09:15	88.112.70.18					xxxxxxxx	29	Female			Yes		Yes			No				None of the above		No
10507715969	225134152	2019-02-04 16:07:32	2019-02-04 16:25:45	79.152.202.213					xxxxxxxx	44	Female			Yes		Yes			No				None of the above	Yes			Not truly life-threatening, but it felt like it			Everything seemed to be happening at once; or time stopped or lost all meaning	No			No			No						I felt incredible peace or pleasantness		Happiness			I felt no longer in conflict with nature
10507715679	225134152	2019-02-04 16:07:32	2019-02-04 16:11:57	79.189.14.61					xxxxxxxx	19	Female			Yes		Yes		Yes			Weakness of your arm leg, face, or half of your body			Yes		Truly life-threatening				Everything seemed to be happening at once; or time stopped or lost all meaning		Faster than usual				My past flashed before me, out of my control			Everything about the universe			I felt relief and calmness			Happiness				I felt united or one with the world
10507715611	225134152	2019-02-04 16:07:47	2019-02-04 16:08:19	163.182.254.31					xxxxxxxx	36	Female			Yes		Yes			No				None of the above		No
10507715579	225134152	2019-02-04 16:07:39	2019-02-04 16:09:38	5.148.111.89					xxxxxxxx	18		Male			No										No
10507715532	225134152	2019-02-04 16:07:40	2019-02-04 16:08:52	95.94.60.86					xxxxxxxx	23		Male		Yes			No								No
10507715372	225134152	2019-02-04 16:07:06	2019-02-04 16:15:18	37.47.34.121					xxxxxxxx	35		Male		Yes			No							Yes			Not truly life-threatening, but it felt like it		Time seemed to go faster or slower than usual			Faster than usual			I remembered many past events			Everything about myself or others				I felt relief and calmness		No				I felt no longer in conflict with nature
10507715313	225134152	2019-02-04 16:07:32	2019-02-04 16:10:42	121.200.16.212					xxxxxxxx	28		Male		Yes			No							Yes		Truly life-threatening				Everything seemed to be happening at once; or time stopped or lost all meaning		Faster than usual		No			No			No, it was unpleasant				No			No
10507715211	225134152	2019-02-04 16:07:31	2019-02-04 16:08:30	77.110.186.179					xxxxxxxx	20		Male		Yes			No								No
10507715209	225134152	2019-02-04 16:07:29	2019-02-04 16:08:55	5.102.1.230					xxxxxxxx	21	Female			Yes			No								No
10507714930	225134152	2019-02-04 16:07:18	2019-02-04 16:08:25	91.158.215.96					xxxxxxxx	37		Male		Yes			No								No
10507714869	225134152	2019-02-04 16:07:10	2019-02-04 16:10:12	128.243.2.59					xxxxxxxx	20	Female			Yes			No							Yes			Not truly life-threatening, but it felt like it			Everything seemed to be happening at once; or time stopped or lost all meaning			Incredibly faster	No				Everything about myself or others		No, it was unpleasant				No			No
10507714851	225134152	2019-02-04 16:07:10	2019-02-04 16:09:10	89.181.122.198					xxxxxxxx	27		Male			No										No
10507714811	225134152	2019-02-04 16:07:13	2019-02-04 16:09:26	193.136.14.251					xxxxxxxx	21	Female			Yes			No								No
10507714767	225134152	2019-02-04 16:07:14	2019-02-04 16:09:51	190.46.119.104					xxxxxxxx	20		Male			No									Yes		Truly life-threatening		No				Faster than usual		No			No			No, it was unpleasant				No			No
10507714710	225134152	2019-02-04 16:07:16	2019-02-04 16:08:59	5.185.67.202					xxxxxxxx	27		Male		Yes		Yes			No	Numbness or tingling of your body or face					No
10507714539	225134152	2019-02-04 16:07:16	2019-02-04 16:07:58	137.120.32.152					xxxxxxxx	27	Female				No										No
10507714391	225134152	2019-02-04 16:07:03	2019-02-04 16:09:49	151.15.250.158					xxxxxxxx	27	Female			Yes		Yes			No				None of the above		No
10507714381	225134152	2019-02-04 16:07:09	2019-02-04 16:08:18	91.248.19.65					xxxxxxxx	23		Male		Yes			No								No
10507713885	225134152	2019-02-04 16:06:54	2019-02-04 16:08:04	147.147.37.130					xxxxxxxx	37		Male			No										No
10507713857	225134152	2019-02-04 16:06:52	2019-02-04 16:07:57	95.94.68.39					xxxxxxxx	19	Female				No										No
10507713820	225134152	2019-02-04 16:06:59	2019-02-04 16:07:50	141.250.232.32					xxxxxxxx	24		Male			No										No
10507713657	225134152	2019-02-04 16:06:52	2019-02-04 16:08:33	79.182.67.35					xxxxxxxx	25	Female			Yes		Yes			No				None of the above		No
10507713464	225134152	2019-02-04 16:06:46	2019-02-04 16:08:36	86.185.32.205					xxxxxxxx	44	Female			Yes		Yes			No				None of the above		No
10507712216	225134152	2019-02-04 16:06:13	2019-02-04 16:12:13	80.25.154.158					xxxxxxxx	19		Male			No									Yes		Truly life-threatening			Time seemed to go faster or slower than usual			Faster than usual		No			No			No, it was unpleasant				No			No
10507712179	225134152	2019-02-04 16:06:17	2019-02-04 16:08:56	213.205.242.195					xxxxxxxx	24	Female			Yes			No							Yes			Not truly life-threatening, but it felt like it			Everything seemed to be happening at once; or time stopped or lost all meaning		Faster than usual				My past flashed before me, out of my control	No			No, it was unpleasant				No			No
10507712159	225134152	2019-02-04 16:06:09	2019-02-04 16:07:47	185.175.33.45					xxxxxxxx	29		Male		Yes		Yes			No				None of the above		No
10507711919	225134152	2019-02-04 16:05:03	2019-02-04 16:06:22	213.205.242.195					xxxxxxxx	24	Female
10507711873	225134152	2019-02-04 16:06:13	2019-02-04 16:06:48	87.176.137.52					xxxxxxxx	30	Female			Yes			No								No
10507711616	225134152	2019-02-04 16:06:06	2019-02-04 16:06:44	89.78.34.66					xxxxxxxx	20		Male			No										No
10507710826	225134152	2019-02-04 16:05:39	2019-02-04 16:06:42	31.54.153.69					xxxxxxxx	23	Female			Yes		Yes		Yes		Numbness or tingling of your body or face					No
10507710690	225134152	2019-02-04 16:05:04	2019-02-04 16:06:39	80.3.25.201					xxxxxxxx	37	Female			Yes		Yes			No				None of the above		No
10507710636	225134152	2019-02-04 16:05:40	2019-02-04 16:06:03	109.173.132.240					xxxxxxxx	20		Male			No										No
10507710377	225134152	2019-02-04 16:05:25	2019-02-04 16:07:46	5.80.236.180					xxxxxxxx	33	Female				No										No
10507710359	225134152	2019-02-04 16:05:16	2019-02-04 16:07:12	86.180.253.159					xxxxxxxx	36	Female			Yes			No								No
10507710236	225134152	2019-02-04 16:05:22	2019-02-04 16:06:25	65.51.47.202					xxxxxxxx	28		Male			No									Yes			Not truly life-threatening, but it felt like it		Time seemed to go faster or slower than usual			Faster than usual		No			No					I felt relief and calmness			Happiness			I felt no longer in conflict with nature
10507710216	225134152	2019-02-04 16:05:19	2019-02-04 16:07:54	176.250.115.157					xxxxxxxx	51		Male			No									Yes			Not truly life-threatening, but it felt like it			Everything seemed to be happening at once; or time stopped or lost all meaning	No			No			No			No, it was unpleasant				No			No
10507710049	225134152	2019-02-04 16:05:20	2019-02-04 16:06:13	31.0.87.138					xxxxxxxx	18		Male			No										No
10507710045	225134152	2019-02-04 16:05:18	2019-02-04 16:06:36	149.22.31.131					xxxxxxxx	35	Female			Yes		Yes		Yes					None of the above		No
10507710040	225134152	2019-02-04 16:05:12	2019-02-04 16:06:23	31.52.82.72					xxxxxxxx	35	Female			Yes		Yes		Yes		Numbness or tingling of your body or face					No
10507710004	225134152	2019-02-04 16:05:10	2019-02-04 16:06:17	86.24.43.40					xxxxxxxx	47	Female			Yes		Yes		Yes		Numbness or tingling of your body or face					No
10507708603	225134152	2019-02-04 16:04:22	2019-02-04 16:05:24	184.18.26.94					xxxxxxxx	24	Female			Yes			No								No
10507708210	225134152	2019-02-04 16:04:41	2019-02-04 16:05:46	194.228.13.134					xxxxxxxx	18		Male		Yes		Yes			No				None of the above		No
10507708137	225134152	2019-02-04 16:04:28	2019-02-04 16:06:09	86.132.201.242					xxxxxxxx	39	Female			Yes			No								No
10507708130	225134152	2019-02-04 16:04:34	2019-02-04 16:06:30	193.136.33.119					xxxxxxxx	23		Male		Yes			No								No
10507707824	225134152	2019-02-04 16:04:13	2019-02-04 16:06:08	95.233.157.206					xxxxxxxx	19	Female			Yes		Yes		Yes			Weakness of your arm leg, face, or half of your body				No
10507706487	225134152	2019-02-04 16:03:51	2019-02-04 16:08:06	2.82.184.196					xxxxxxxx	19		Male			No									Yes		Truly life-threatening				Everything seemed to be happening at once; or time stopped or lost all meaning		Faster than usual		No			No				No, it was a neutral			No			No
10507706419	225134152	2019-02-04 16:03:30	2019-02-04 16:05:17	2.221.123.52					xxxxxxxx	45	Female			Yes			No								No
10507706262	225134152	2019-02-04 16:03:48	2019-02-04 16:05:21	90.90.255.179					xxxxxxxx	22		Male			No										No
10507705800	225134152	2019-02-04 16:03:36	2019-02-04 16:08:11	194.66.32.17					xxxxxxxx	27		Male		Yes		Yes			No				None of the above	Yes			Not truly life-threatening, but it felt like it			Everything seemed to be happening at once; or time stopped or lost all meaning		Faster than usual		No			No			No, it was unpleasant				No			No
10507705583	225134152	2019-02-04 16:03:27	2019-02-04 16:06:17	87.188.251.120					xxxxxxxx	24		Male		Yes		Yes		Yes					None of the above	Yes		Truly life-threatening		No				Faster than usual		No			No			No, it was unpleasant				No			No
10507704410	225134152	2019-02-04 16:02:53	2019-02-04 16:04:26	85.74.202.163					xxxxxxxx	25		Male		Yes		Yes			No				None of the above		No
10507704341	225134152	2019-02-04 16:02:55	2019-02-04 16:03:43	47.35.121.181					xxxxxxxx	33	Female			Yes		Yes		Yes					None of the above		No
10507703780	225134152	2019-02-04 16:02:33	2019-02-04 16:03:54	187.152.123.121					xxxxxxxx	33		Male			No										No
10507703682	225134152	2019-02-04 16:02:41	2019-02-04 16:14:36	46.233.90.243					xxxxxxxx	26	Female			Yes		Yes		Yes					None of the above	Yes			Not truly life-threatening, but it felt like it			Everything seemed to be happening at once; or time stopped or lost all meaning		Faster than usual		No				Everything about myself or others			No, it was a neutral			No			No
10507703539	225134152	2019-02-04 16:02:25	2019-02-04 16:11:09	188.146.169.172					xxxxxxxx	28	Female			Yes		Yes			No				None of the above	Yes		Truly life-threatening				Everything seemed to be happening at once; or time stopped or lost all meaning	No				I remembered many past events		No				No, it was a neutral			No			No
10507703439	225134152	2019-02-04 16:02:20	2019-02-04 16:03:51	83.71.83.5					xxxxxxxx	36	Female			Yes		Yes			No				None of the above		No
10507702822	225134152	2019-02-04 16:01:54	2019-02-04 16:10:35	78.23.225.152					xxxxxxxx	48		Male		Yes			No							Yes		Truly life-threatening			Time seemed to go faster or slower than usual			Faster than usual			I remembered many past events			Everything about myself or others			No, it was a neutral				Happiness				I felt united or one with the world
10507702537	225134152	2019-02-04 16:01:40	2019-02-04 16:03:47	51.6.226.88					xxxxxxxx	50	Female			Yes		Yes		Yes					None of the above		No
10507702215	225134152	2019-02-04 16:02:03	2019-02-04 16:02:51	83.240.200.209					xxxxxxxx	35		Male		Yes		Yes			No				None of the above		No
10507702158	225134152	2019-02-04 16:01:57	2019-02-04 16:06:42	82.132.235.127					xxxxxxxx	29		Male		Yes		Yes		Yes		Numbness or tingling of your body or face				Yes		Truly life-threatening			Time seemed to go faster or slower than usual			Faster than usual		No			No					I felt relief and calmness		No			No
10507701485	225134152	2019-02-04 16:01:43	2019-02-04 16:09:03	75.89.45.214					xxxxxxxx	56	Female			Yes		Yes		Yes					None of the above	Yes		Truly life-threatening			Time seemed to go faster or slower than usual		No			No			No						I felt incredible peace or pleasantness	No				I felt no longer in conflict with nature
10507701446	225134152	2019-02-04 16:01:43	2019-02-04 16:09:15	5.55.204.84					xxxxxxxx	33		Male		Yes		Yes			No			Difficulty speaking		Yes		Truly life-threatening				Everything seemed to be happening at once; or time stopped or lost all meaning			Incredibly faster		I remembered many past events		No				No, it was a neutral			No			No
10507701334	225134152	2019-02-04 16:01:22	2019-02-04 16:02:52	86.83.44.252					xxxxxxxx	40	Female			Yes		Yes		Yes			Weakness of your arm leg, face, or half of your body				No
10507700265	225134152	2019-02-04 16:01:11	2019-02-04 16:05:43	185.67.69.210					xxxxxxxx	25		Male		Yes		Yes		Yes					None of the above	Yes		Truly life-threatening				Everything seemed to be happening at once; or time stopped or lost all meaning			Incredibly faster			My past flashed before me, out of my control		Everything about myself or others			No, it was a neutral			No			No
10507700072	225134152	2019-02-04 16:00:47	2019-02-04 16:10:29	80.62.117.199					xxxxxxxx	50	Female			Yes		Yes		Yes				Difficulty speaking		Yes			Not truly life-threatening, but it felt like it			Everything seemed to be happening at once; or time stopped or lost all meaning			Incredibly faster	No					Everything about the universe		No, it was a neutral			No					I felt united or one with the world
10507699684	225134152	2019-02-04 16:00:57	2019-02-04 16:01:47	2.126.249.179					xxxxxxxx	43		Male		Yes		Yes		Yes					None of the above		No
10507699485	225134152	2019-02-04 16:00:47	2019-02-04 16:02:05	90.215.200.81					xxxxxxxx	51	Female			Yes		Yes		Yes					None of the above		No
10507698778	225134152	2019-02-04 16:00:02	2019-02-04 16:03:07	77.27.50.170					xxxxxxxx	29	Female			Yes		Yes		Yes					None of the above	Yes		Truly life-threatening				Everything seemed to be happening at once; or time stopped or lost all meaning	No			No			No			No, it was unpleasant				No			No
10507698565	225134152	2019-02-04 16:00:22	2019-02-04 16:00:56	65.190.56.151					xxxxxxxx	27		Male			No										No
10507698410	225134152	2019-02-04 15:59:47	2019-02-04 16:02:34	148.69.13.17					xxxxxxxx	40		Male			No										No
10507698176	225134152	2019-02-04 15:59:53	2019-02-04 16:01:34	143.159.231.167					xxxxxxxx	22	Female			Yes		Yes		Yes			Weakness of your arm leg, face, or half of your body				No
10507696484	225134152	2019-02-04 15:59:12	2019-02-04 16:00:35	77.101.242.10					xxxxxxxx	34		Male			No										No
10507696245	225134152	2019-02-04 15:59:13	2019-02-04 16:00:59	81.132.145.202					xxxxxxxx	30	Female				No										No
10507696060	225134152	2019-02-04 15:59:14	2019-02-04 16:00:32	2.222.248.93					xxxxxxxx	23		Male		Yes		Yes			No		Weakness of your arm leg, face, or half of your body				No
10507695955	225134152	2019-02-04 15:58:02	2019-02-04 16:00:18	46.144.235.246					xxxxxxxx	26		Male		Yes			No								No
10507695228	225134152	2019-02-04 15:58:37	2019-02-04 15:59:58	77.167.11.246					xxxxxxxx	18		Male			No										No
10507695218	225134152	2019-02-04 15:58:36	2019-02-04 15:59:47	213.205.192.117					xxxxxxxx	35	Female			Yes			No								No
10507694768	225134152	2019-02-04 15:58:35	2019-02-04 15:59:07	96.36.47.46					xxxxxxxx	34		Male			No										No
10507694661	225134152	2019-02-04 15:58:07	2019-02-04 15:59:54	84.86.146.76					xxxxxxxx	33	Female				No										No
10507694528	225134152	2019-02-04 15:58:29	2019-02-04 16:02:12	194.210.198.121					xxxxxxxx	20	Female			Yes		Yes		Yes		Numbness or tingling of your body or face				Yes			Not truly life-threatening, but it felt like it		Time seemed to go faster or slower than usual			Faster than usual		No			No			No, it was unpleasant				No			No
10507694493	225134152	2019-02-04 15:58:23	2019-02-04 16:01:01	94.197.121.164					xxxxxxxx	37		Male		Yes			No							Yes		Truly life-threatening			Time seemed to go faster or slower than usual			Faster than usual		No			No			No, it was unpleasant				No			No
10507694349	225134152	2019-02-04 15:58:29	2019-02-04 15:59:01	50.84.190.170					xxxxxxxx	31		Male			No										No
10507694261	225134152	2019-02-04 15:57:07	2019-02-04 15:59:45	89.241.249.221					xxxxxxxx	42	Female				No										No
10507694255	225134152	2019-02-04 15:58:18	2019-02-04 15:59:05	94.15.55.86					xxxxxxxx	47		Male			No										No
10507693518	225134152	2019-02-04 15:57:48	2019-02-04 16:02:53	2.236.240.51					xxxxxxxx	22	Female			Yes		Yes			No	Numbness or tingling of your body or face				Yes		Truly life-threatening			Time seemed to go faster or slower than usual				Incredibly faster			My past flashed before me, out of my control	No			No, it was unpleasant				No			No
10507693180	225134152	2019-02-04 15:57:56	2019-02-04 16:00:07	217.83.119.227					xxxxxxxx	26		Male		Yes			No							Yes		Truly life-threatening			Time seemed to go faster or slower than usual			Faster than usual		No			No				No, it was a neutral			No			No
10507693038	225134152	2019-02-04 15:57:44	2019-02-04 15:58:16	82.1.77.191					xxxxxxxx	22	Female			Yes			No								No
10507692891	225134152	2019-02-04 15:57:17	2019-02-04 15:58:19	90.211.191.72					xxxxxxxx	18	Female				No										No
10507692516	225134152	2019-02-04 15:57:09	2019-02-04 16:00:26	68.37.13.204					xxxxxxxx	45	Female			Yes			No							Yes		Truly life-threatening				Everything seemed to be happening at once; or time stopped or lost all meaning	No			No			No				No, it was a neutral			No				I felt no longer in conflict with nature
10507692511	225134152	2019-02-04 15:57:27	2019-02-04 15:58:50	37.47.186.101					xxxxxxxx	18		Male		Yes		Yes			No			Difficulty speaking			No
10507692320	225134152	2019-02-04 15:57:07	2019-02-04 15:58:20	82.173.184.16					xxxxxxxx	44		Male			No										No
10507691915	225134152	2019-02-04 15:57:08	2019-02-04 16:01:26	86.40.100.132					xxxxxxxx	27		Male		Yes			No							Yes		Truly life-threatening				Everything seemed to be happening at once; or time stopped or lost all meaning	No			No			No			No, it was unpleasant				No			No
10507691740	225134152	2019-02-04 15:57:03	2019-02-04 15:58:17	86.150.147.234					xxxxxxxx	24	Female			Yes		Yes			No				None of the above		No
10507691686	225134152	2019-02-04 15:56:55	2019-02-04 15:58:49	176.248.30.35					xxxxxxxx	35	Female			Yes			No								No
10507691607	225134152	2019-02-04 15:56:33	2019-02-04 16:00:14	176.92.1.188					xxxxxxxx	20		Male		Yes		Yes			No				None of the above	Yes		Truly life-threatening			Time seemed to go faster or slower than usual		No			No			No				No, it was a neutral			No			No
10507691315	225134152	2019-02-04 15:56:53	2019-02-04 15:58:57	212.31.253.110					xxxxxxxx	41		Male			No										No
10507691307	225134152	2019-02-04 15:57:00	2019-02-04 15:57:39	81.31.116.43					xxxxxxxx	25	Female			Yes		Yes			No				None of the above		No
10507690482	225134152	2019-02-04 15:56:30	2019-02-04 15:57:54	80.194.73.125					xxxxxxxx	26	Female				No									Yes			Not truly life-threatening, but it felt like it		Time seemed to go faster or slower than usual			Faster than usual		No			No			No, it was unpleasant				No			No
10507689034	225134152	2019-02-04 15:55:39	2019-02-04 15:56:39	212.183.196.182					xxxxxxxx	31		Male		Yes			No								No
10507688797	225134152	2019-02-04 15:55:42	2019-02-04 15:56:35	83.26.229.123					xxxxxxxx	21		Male			No										No
10507688750	225134152	2019-02-04 15:55:32	2019-02-04 15:57:41	130.206.201.58					xxxxxxxx	31	Female				No										No
10507688131	225134152	2019-02-04 15:55:26	2019-02-04 15:56:11	192.197.205.213					xxxxxxxx	23	Female				No										No
10507688046	225134152	2019-02-04 15:55:18	2019-02-04 15:55:51	86.191.47.191					xxxxxxxx	25	Female				No										No
10507687757	225134152	2019-02-04 15:55:06	2019-02-04 15:56:20	194.29.183.75					xxxxxxxx	22	Female			Yes		Yes			No			Difficulty speaking			No
10507687171	225134152	2019-02-04 15:54:56	2019-02-04 15:55:54	193.137.201.102					xxxxxxxx	28		Male		Yes		Yes		Yes			Weakness of your arm leg, face, or half of your body				No
10507686977	225134152	2019-02-04 15:54:41	2019-02-04 16:13:06	189.164.172.198					xxxxxxxx	25	Female				No									Yes		Truly life-threatening				Everything seemed to be happening at once; or time stopped or lost all meaning		Faster than usual			I remembered many past events		No				No, it was a neutral			No			No
10507686461	225134152	2019-02-04 15:53:57	2019-02-04 15:57:45	82.23.65.46					xxxxxxxx	73	Female				No									Yes		Truly life-threatening				Everything seemed to be happening at once; or time stopped or lost all meaning	No			No			No			No, it was unpleasant				No			No
10507686246	225134152	2019-02-04 15:54:30	2019-02-04 15:55:09	31.205.232.244					xxxxxxxx	22	Female			Yes		Yes			No				None of the above		No
10507686138	225134152	2019-02-04 15:54:16	2019-02-04 15:55:12	188.37.169.127					xxxxxxxx	20		Male			No										No
10507686106	225134152	2019-02-04 15:54:13	2019-02-04 15:57:23	188.156.69.195					xxxxxxxx	35		Male		Yes		Yes			No				None of the above		No
10507685462	225134152	2019-02-04 15:53:59	2019-02-04 15:54:55	2.29.227.112					xxxxxxxx	47	Female			Yes			No								No
10507685350	225134152	2019-02-04 15:53:56	2019-02-04 15:57:46	90.195.149.168					xxxxxxxx	32	Female			Yes			No							Yes		Truly life-threatening				Everything seemed to be happening at once; or time stopped or lost all meaning		Faster than usual			I remembered many past events		No						I felt incredible peace or pleasantness	No			No
10507685055	225134152	2019-02-04 15:53:50	2019-02-04 15:59:37	90.254.96.27					xxxxxxxx	57	Female			Yes			No							Yes		Truly life-threatening				Everything seemed to be happening at once; or time stopped or lost all meaning	No			No			No			No, it was unpleasant				No			No
10507684869	225134152	2019-02-04 15:53:53	2019-02-04 15:54:49	82.17.101.59					xxxxxxxx	33	Female			Yes		Yes			No				None of the above		No
10507684812	225134152	2019-02-04 15:53:38	2019-02-04 15:55:02	82.132.232.54					xxxxxxxx	40		Male		Yes			No								No
10507684604	225134152	2019-02-04 15:53:40	2019-02-04 15:54:30	80.229.164.75					xxxxxxxx	60	Female			Yes		Yes			No				None of the above		No
10507684402	225134152	2019-02-04 15:52:57	2019-02-04 15:54:58	94.212.71.146					xxxxxxxx	59		Male		Yes			No								No
10507683632	225134152	2019-02-04 15:53:11	2019-02-04 15:54:04	85.246.6.171					xxxxxxxx	25	Female				No										No
10507683583	225134152	2019-02-04 15:53:12	2019-02-04 15:54:58	86.180.93.211					xxxxxxxx	24	Female				No									Yes			Not truly life-threatening, but it felt like it			Everything seemed to be happening at once; or time stopped or lost all meaning	No			No				Everything about myself or others		No, it was unpleasant				No			No
10507682694	225134152	2019-02-04 15:52:49	2019-02-04 15:53:21	80.89.78.150					xxxxxxxx	24		Male			No										No
10507682680	225134152	2019-02-04 15:52:40	2019-02-04 15:55:08	77.96.136.158					xxxxxxxx	38	Female				No										No
10507682617	225134152	2019-02-04 15:52:30	2019-02-04 15:54:34	46.19.85.170					xxxxxxxx	38	Female			Yes			No								No
10507682519	225134152	2019-02-04 15:52:32	2019-02-04 15:53:38	88.105.159.220					xxxxxxxx	24	Female				No										No
10507682475	225134152	2019-02-04 15:52:41	2019-02-04 15:53:18	82.24.114.135					xxxxxxxx	27	Female			Yes			No								No
10507682332	225134152	2019-02-04 15:52:37	2019-02-04 15:53:17	151.237.239.186					xxxxxxxx	34	Female				No										No
10507682116	225134152	2019-02-04 15:52:28	2019-02-04 15:54:33	188.193.16.140					xxxxxxxx	30	Female			Yes		Yes			No				None of the above		No
10507681832	225134152	2019-02-04 15:52:22	2019-02-04 15:53:23	62.172.227.2					xxxxxxxx	36	Female			Yes		Yes		Yes					None of the above		No
10507681653	225134152	2019-02-04 15:52:10	2019-02-04 15:52:45	31.208.194.63					xxxxxxxx	18		Male			No										No
10507681627	225134152	2019-02-04 15:52:08	2019-02-04 16:00:28	187.155.70.5					xxxxxxxx	20		Male		Yes		Yes		Yes			Weakness of your arm leg, face, or half of your body			Yes		Truly life-threatening			Time seemed to go faster or slower than usual				Incredibly faster	No			No					I felt relief and calmness		No			No
10507681383	225134152	2019-02-04 15:52:13	2019-02-04 15:53:13	134.102.131.99					xxxxxxxx	28	Female			Yes		Yes			No				None of the above		No
10507680585	225134152	2019-02-04 15:51:39	2019-02-04 15:52:36	213.205.251.105					xxxxxxxx	23	Female			Yes		Yes		Yes		Numbness or tingling of your body or face					No
10507680212	225134152	2019-02-04 15:51:35	2019-02-04 15:52:18	86.139.210.173					xxxxxxxx	32	Female			Yes			No								No
10507680078	225134152	2019-02-04 15:51:07	2019-02-04 15:52:16	94.15.192.220					xxxxxxxx	22		Male		Yes		Yes			No				None of the above		No
10507679823	225134152	2019-02-04 15:50:17	2019-02-04 15:53:54	89.67.76.158					xxxxxxxx	28		Male		Yes		Yes			No				None of the above		No
10507679721	225134152	2019-02-04 15:51:15	2019-02-04 15:53:02	62.38.51.14					xxxxxxxx	30		Male			No										No
10507679296	225134152	2019-02-04 15:51:04	2019-02-04 15:53:18	94.197.120.75					xxxxxxxx	26	Female			Yes		Yes		Yes					None of the above	Yes			Not truly life-threatening, but it felt like it		Time seemed to go faster or slower than usual			Faster than usual		No			No				No, it was a neutral				Happiness		No
10507679167	225134152	2019-02-04 15:51:01	2019-02-04 15:51:51	77.22.252.129					xxxxxxxx	26		Male		Yes			No								No
10507679153	225134152	2019-02-04 15:50:39	2019-02-04 15:51:48	82.44.130.55					xxxxxxxx	57	Female				No										No
10507679043	225134152	2019-02-04 15:50:59	2019-02-04 15:51:32	213.123.54.101					xxxxxxxx	25	Female				No										No
10507677192	225134152	2019-02-04 15:50:00	2019-02-04 15:51:52	193.82.247.17					xxxxxxxx	25	Female			Yes			No							Yes			Not truly life-threatening, but it felt like it			Everything seemed to be happening at once; or time stopped or lost all meaning	No			No			No			No, it was unpleasant				No			No
10507676273	225134152	2019-02-04 15:49:32	2019-02-04 15:50:24	93.234.196.70					xxxxxxxx	26		Male		Yes			No								No
10507676062	225134152	2019-02-04 15:49:18	2019-02-04 15:52:10	142.162.109.144					xxxxxxxx	47	Female			Yes		Yes		Yes					None of the above		No
10507676025	225134152	2019-02-04 15:49:23	2019-02-04 16:05:36	85.211.220.13					xxxxxxxx	19	Female				No									Yes			Not truly life-threatening, but it felt like it		Time seemed to go faster or slower than usual			Faster than usual		No			No			No, it was unpleasant				No			No
10507675919	225134152	2019-02-04 15:49:18	2019-02-04 15:50:03	217.97.114.212					xxxxxxxx	24		Male		Yes		Yes		Yes					None of the above		No
10507675812	225134152	2019-02-04 15:48:56	2019-02-04 15:52:59	201.172.204.40					xxxxxxxx	23		Male			No									Yes		Truly life-threatening				Everything seemed to be happening at once; or time stopped or lost all meaning	No			No			No			No, it was unpleasant				No			No
10507675755	225134152	2019-02-04 15:49:15	2019-02-04 15:51:13	89.68.30.129					xxxxxxxx	20		Male		Yes			No							Yes		Truly life-threatening				Everything seemed to be happening at once; or time stopped or lost all meaning	No				I remembered many past events		No					I felt relief and calmness		No				I felt no longer in conflict with nature
10507675659	225134152	2019-02-04 15:49:02	2019-02-04 15:55:18	84.236.3.102					xxxxxxxx	31	Female			Yes		Yes		Yes					None of the above	Yes			Not truly life-threatening, but it felt like it		Time seemed to go faster or slower than usual				Incredibly faster	No			No			No, it was unpleasant				No			No
10507674184	225134152	2019-02-04 15:48:21	2019-02-04 15:51:17	69.14.103.32					xxxxxxxx	33		Male		Yes			No							Yes		Truly life-threatening			Time seemed to go faster or slower than usual			Faster than usual		No			No				No, it was a neutral			No			No
10507674032	225134152	2019-02-04 15:46:52	2019-02-04 15:51:12	86.17.61.17					xxxxxxxx	38	Female			Yes		Yes		Yes					None of the above	Yes		Truly life-threatening		No			No			No			No			No, it was unpleasant				No			No
10507673954	225134152	2019-02-04 15:48:20	2019-02-04 15:49:00	31.185.134.103					xxxxxxxx	43		Male			No										No
10507673741	225134152	2019-02-04 15:47:43	2019-02-04 15:49:07	86.27.238.93					xxxxxxxx	20	Female			Yes			No								No
10507673442	225134152	2019-02-04 15:48:06	2019-02-04 15:48:35	73.168.162.35					xxxxxxxx	20	Female			Yes			No								No
10507672726	225134152	2019-02-04 15:47:45	2019-02-04 15:48:39	188.127.182.109					xxxxxxxx	36		Male		Yes			No								No
10507672608	225134152	2019-02-04 15:47:42	2019-02-04 15:51:04	5.243.53.217					xxxxxxxx	28		Male			No									Yes		Truly life-threatening		No				Faster than usual		No			No				No, it was a neutral			No			No
10507672508	225134152	2019-02-04 15:47:41	2019-02-04 15:48:23	84.206.11.64					xxxxxxxx	27		Male			No										No
10507670819	225134152	2019-02-04 15:46:47	2019-02-04 15:47:18	81.147.183.229					xxxxxxxx	37	Female			Yes			No								No
10507670581	225134152	2019-02-04 15:46:38	2019-02-04 15:49:47	58.85.157.224					xxxxxxxx	26		Male		Yes			No							Yes			Not truly life-threatening, but it felt like it		Time seemed to go faster or slower than usual			Faster than usual			I remembered many past events		No				No, it was a neutral			No			No
10507669986	225134152	2019-02-04 15:46:14	2019-02-04 15:47:16	77.102.78.221					xxxxxxxx	18		Male			No										No
10507669836	225134152	2019-02-04 15:46:16	2019-02-04 15:47:46	79.13.110.107					xxxxxxxx	26		Male		Yes			No								No
10507669780	225134152	2019-02-04 15:46:09	2019-02-04 15:47:12	146.169.176.57					xxxxxxxx	23	Female			Yes		Yes		Yes					None of the above		No
10507669280	225134152	2019-02-04 15:45:59	2019-02-04 15:48:09	24.59.247.164					xxxxxxxx	50	Female			Yes		Yes		Yes		Numbness or tingling of your body or face					No
10507669013	225134152	2019-02-04 15:45:44	2019-02-04 15:46:33	131.251.253.111					xxxxxxxx	19	Female			Yes			No								No
10507668895	225134152	2019-02-04 15:45:43	2019-02-04 15:47:31	79.68.236.164					xxxxxxxx	57		Male			No									Yes			Not truly life-threatening, but it felt like it	No			No			No					Everything about the universe			I felt relief and calmness			Happiness			I felt no longer in conflict with nature
10507668844	225134152	2019-02-04 15:45:05	2019-02-04 15:56:21	130.159.236.1					xxxxxxxx	18	Female			Yes			No							Yes		Truly life-threatening			Time seemed to go faster or slower than usual			Faster than usual		No				Everything about myself or others		No, it was unpleasant				No			No
10507668571	225134152	2019-02-04 15:45:31	2019-02-04 15:46:38	79.69.141.216					xxxxxxxx	40	Female			Yes		Yes			No			Difficulty speaking			No
10507668352	225134152	2019-02-04 15:45:20	2019-02-04 15:51:57	213.205.241.10					xxxxxxxx	21		Male			No									Yes		Truly life-threatening			Time seemed to go faster or slower than usual				Incredibly faster	No			No				No, it was a neutral			No			No
10507668125	225134152	2019-02-04 15:45:16	2019-02-04 15:47:05	92.12.185.14					xxxxxxxx	33	Female			Yes		Yes		Yes			Weakness of your arm leg, face, or half of your body				No
10507668056	225134152	2019-02-04 15:45:04	2019-02-04 15:46:05	212.187.164.190					xxxxxxxx	39		Male			No										No
10507667866	225134152	2019-02-04 15:45:03	2019-02-04 15:47:35	5.173.160.136					xxxxxxxx	28	Female			Yes			No								No
10507666016	225134152	2019-02-04 15:44:25	2019-02-04 15:46:01	68.224.135.118					xxxxxxxx	28	Female			Yes		Yes		Yes					None of the above		No
10507665667	225134152	2019-02-04 15:44:13	2019-02-04 15:45:07	128.243.2.13					xxxxxxxx	18	Female			Yes		Yes		Yes				Difficulty speaking			No
10507665322	225134152	2019-02-04 15:43:41	2019-02-04 15:46:42	99.2.61.239					xxxxxxxx	36		Male		Yes		Yes			No	Numbness or tingling of your body or face					No
10507664478	225134152	2019-02-04 15:43:25	2019-02-04 15:45:51	79.31.108.55					xxxxxxxx	45	Female			Yes		Yes			No				None of the above		No
10507664340	225134152	2019-02-04 15:43:34	2019-02-04 15:44:09	87.205.58.208					xxxxxxxx	35		Male		Yes			No								No
10507664140	225134152	2019-02-04 15:43:27	2019-02-04 15:44:20	83.27.110.85					xxxxxxxx	24		Male		Yes		Yes			No				None of the above		No
10507663097	225134152	2019-02-04 15:42:31	2019-02-04 15:43:59	83.103.96.56					xxxxxxxx	49	Female			Yes			No								No
10507663010	225134152	2019-02-04 15:42:50	2019-02-04 15:44:00	193.1.100.77					xxxxxxxx	24	Female			Yes		Yes		Yes					None of the above		No
10507662307	225134152	2019-02-04 15:42:27	2019-02-04 15:43:30	212.225.212.103					xxxxxxxx	48	Female			Yes			No								No
10507662269	225134152	2019-02-04 15:42:13	2019-02-04 15:47:01	95.251.57.246					xxxxxxxx	19	Female				No										No
10507661832	225134152	2019-02-04 15:42:15	2019-02-04 15:44:23	2.122.84.198					xxxxxxxx	39	Female				No									Yes		Truly life-threatening				Everything seemed to be happening at once; or time stopped or lost all meaning			Incredibly faster	No			No			No, it was unpleasant				No			No
10507661739	225134152	2019-02-04 15:42:17	2019-02-04 15:50:54	90.218.33.165					xxxxxxxx	32		Male		Yes			No							Yes		Truly life-threatening			Time seemed to go faster or slower than usual			Faster than usual			I remembered many past events		No				No, it was a neutral			No			No
10507661650	225134152	2019-02-04 15:42:00	2019-02-04 15:44:03	90.209.20.223					xxxxxxxx	37		Male			No										No
10507660860	225134152	2019-02-04 15:41:44	2019-02-04 15:42:59	142.177.24.139					xxxxxxxx	27	Female			Yes		Yes		Yes					None of the above		No
10507660479	225134152	2019-02-04 15:39:27	2019-02-04 15:50:49	189.166.59.141					xxxxxxxx	36		Male			No									Yes		Truly life-threatening			Time seemed to go faster or slower than usual				Incredibly faster	No				Everything about myself or others		No, it was unpleasant				No			No
10507660066	225134152	2019-02-04 15:41:12	2019-02-04 15:42:20	83.100.152.116					xxxxxxxx	35	Female			Yes		Yes		Yes			Weakness of your arm leg, face, or half of your body				No
10507660055	225134152	2019-02-04 15:41:21	2019-02-04 15:42:11	189.214.3.219					xxxxxxxx	20		Male		Yes			No								No
10507659945	225134152	2019-02-04 15:41:09	2019-02-04 15:44:15	94.0.4.2					xxxxxxxx	33	Female			Yes			No							Yes			Not truly life-threatening, but it felt like it	No			No			No			No			No, it was unpleasant				No			No
10507659850	225134152	2019-02-04 15:41:01	2019-02-04 15:44:29	82.132.225.253					xxxxxxxx	27	Female			Yes			No								No
10507659611	225134152	2019-02-04 15:40:43	2019-02-04 15:42:21	93.44.100.225					xxxxxxxx	19	Female			Yes			No								No
10507659585	225134152	2019-02-04 15:40:36	2019-02-04 15:42:40	173.79.88.174					xxxxxxxx	35	Female			Yes			No								No
10507659562	225134152	2019-02-04 15:40:52	2019-02-04 15:45:29	213.205.192.208					xxxxxxxx	39	Female			Yes			No								No
10507659219	225134152	2019-02-04 15:40:58	2019-02-04 15:42:27	92.234.55.215					xxxxxxxx	33	Female			Yes		Yes			No				None of the above		No
10507658465	225134152	2019-02-04 15:40:34	2019-02-04 15:45:57	62.28.248.189					xxxxxxxx	32		Male			No									Yes		Truly life-threatening			Time seemed to go faster or slower than usual			Faster than usual		No			No			No, it was unpleasant				No			No
10507657539	225134152	2019-02-04 15:38:51	2019-02-04 15:50:44	166.48.150.196					xxxxxxxx	27	Female				No									Yes		Truly life-threatening				Everything seemed to be happening at once; or time stopped or lost all meaning	No			No					Everything about the universe		No, it was a neutral			No				I felt no longer in conflict with nature
10507656371	225134152	2019-02-04 15:39:32	2019-02-04 15:40:21	81.139.27.89					xxxxxxxx	38		Male		Yes		Yes		Yes					None of the above		No
10507656335	225134152	2019-02-04 15:39:20	2019-02-04 15:42:44	91.231.60.3					xxxxxxxx	23		Male		Yes		Yes			No				None of the above		No
10507656034	225134152	2019-02-04 15:39:06	2019-02-04 15:53:56	82.37.245.63					xxxxxxxx	58	Female			Yes		Yes		Yes			Weakness of your arm leg, face, or half of your body			Yes		Truly life-threatening			Time seemed to go faster or slower than usual		No					My past flashed before me, out of my control	No				No, it was a neutral			No			No
10507655887	225134152	2019-02-04 15:38:59	2019-02-04 15:41:44	217.129.208.73					xxxxxxxx	25		Male		Yes			No								No
10507655551	225134152	2019-02-04 15:39:04	2019-02-04 15:39:33	217.42.9.28					xxxxxxxx	45	Female				No										No
10507655446	225134152	2019-02-04 15:38:57	2019-02-04 15:40:07	148.88.244.15					xxxxxxxx	19		Male			No										No
10507655037	225134152	2019-02-04 15:38:40	2019-02-04 15:40:09	88.200.99.157					xxxxxxxx	19	Female			Yes			No								No
10507654657	225134152	2019-02-04 15:38:41	2019-02-04 15:39:46	146.255.183.18					xxxxxxxx	18		Male		Yes			No								No
10507654387	225134152	2019-02-04 15:38:24	2019-02-04 15:40:20	79.131.252.107					xxxxxxxx	18	Female			Yes		Yes		Yes					None of the above		No
10507654360	225134152	2019-02-04 15:38:09	2019-02-04 15:39:16	62.42.121.193					xxxxxxxx	24	Female				No										No
10507654345	225134152	2019-02-04 15:37:53	2019-02-04 15:39:58	82.155.39.135					xxxxxxxx	23	Female				No										No
10507654146	225134152	2019-02-04 15:38:20	2019-02-04 15:43:21	136.59.160.252					xxxxxxxx	48	Female			Yes		Yes		Yes				Difficulty speaking		Yes		Truly life-threatening			Time seemed to go faster or slower than usual		No			No			No				No, it was a neutral			No					I felt united or one with the world
10507654029	225134152	2019-02-04 15:38:25	2019-02-04 15:39:05	86.12.204.29					xxxxxxxx	29	Female				No										No
10507653684	225134152	2019-02-04 15:38:07	2019-02-04 15:44:34	94.118.240.101					xxxxxxxx	28	Female			Yes		Yes		Yes			Weakness of your arm leg, face, or half of your body			Yes			Not truly life-threatening, but it felt like it			Everything seemed to be happening at once; or time stopped or lost all meaning		Faster than usual		No				Everything about myself or others		No, it was unpleasant				No				I felt no longer in conflict with nature
10507653511	225134152	2019-02-04 15:38:07	2019-02-04 15:38:42	31.0.122.50					xxxxxxxx	28		Male			No										No
10507652907	225134152	2019-02-04 15:37:50	2019-02-04 15:39:21	79.229.66.180					xxxxxxxx	34	Female			Yes		Yes			No				None of the above		No
10507652303	225134152	2019-02-04 15:37:09	2019-02-04 15:44:55	5.172.255.190					xxxxxxxx	28		Male			No									Yes			Not truly life-threatening, but it felt like it		Time seemed to go faster or slower than usual			Faster than usual			I remembered many past events			Everything about myself or others				I felt relief and calmness			Happiness			I felt no longer in conflict with nature
10507651922	225134152	2019-02-04 15:37:19	2019-02-04 15:38:33	94.197.120.96					xxxxxxxx	40	Female			Yes		Yes		Yes		Numbness or tingling of your body or face					No
10507651340	225134152	2019-02-04 15:36:59	2019-02-04 15:38:53	90.200.44.187					xxxxxxxx	36	Female			Yes		Yes		Yes					None of the above		No
10507651321	225134152	2019-02-04 15:33:53	2019-02-04 15:38:11	94.175.246.13					xxxxxxxx	26	Female				No										No
10507651199	225134152	2019-02-04 15:36:34	2019-02-04 15:39:26	167.98.17.86					xxxxxxxx	48	Female			Yes			No								No
10507651143	225134152	2019-02-04 15:36:57	2019-02-04 15:38:10	109.149.211.13					xxxxxxxx	27	Female			Yes			No								No
10507650571	225134152	2019-02-04 15:36:43	2019-02-04 15:37:31	94.0.102.64					xxxxxxxx	39	Female				No										No
10507650192	225134152	2019-02-04 15:36:16	2019-02-04 15:38:43	185.153.35.251					xxxxxxxx	28		Male		Yes		Yes		Yes			Weakness of your arm leg, face, or half of your body				No
10507650010	225134152	2019-02-04 15:36:12	2019-02-04 15:38:08	37.201.192.124					xxxxxxxx	26		Male		Yes		Yes			No		Weakness of your arm leg, face, or half of your body				No
10507649411	225134152	2019-02-04 15:36:02	2019-02-04 15:36:55	92.27.172.155					xxxxxxxx	41	Female				No										No
10507648668	225134152	2019-02-04 15:35:38	2019-02-04 15:37:33	71.239.123.249					xxxxxxxx	42		Male		Yes			No								No
10507648142	225134152	2019-02-04 15:35:27	2019-02-04 15:36:16	81.148.220.184					xxxxxxxx	31		Male		Yes			No								No
10507647791	225134152	2019-02-04 15:35:25	2019-02-04 15:36:03	183.180.158.29					xxxxxxxx	28	Female				No										No
10507647685	225134152	2019-02-04 15:35:18	2019-02-04 15:37:06	88.157.225.238					xxxxxxxx	35		Male		Yes			No								No
10507647292	225134152	2019-02-04 15:34:56	2019-02-04 15:41:49	37.160.33.133					xxxxxxxx	60	Female			Yes		Yes		Yes					None of the above		No
10507647235	225134152	2019-02-04 15:34:56	2019-02-04 15:37:07	74.90.248.24					xxxxxxxx	29	Female			Yes			No							Yes			Not truly life-threatening, but it felt like it		Time seemed to go faster or slower than usual			Faster than usual			I remembered many past events			Everything about myself or others				I felt relief and calmness				Incredible joy		I felt no longer in conflict with nature
10507647083	225134152	2019-02-04 15:34:42	2019-02-04 15:38:52	188.251.155.149					xxxxxxxx	20	Female			Yes			No							Yes			Not truly life-threatening, but it felt like it			Everything seemed to be happening at once; or time stopped or lost all meaning		Faster than usual		No				Everything about myself or others			No, it was a neutral			No				I felt no longer in conflict with nature
10507646539	225134152	2019-02-04 15:34:37	2019-02-04 15:39:32	71.208.116.208					xxxxxxxx	25		Male			No									Yes			Not truly life-threatening, but it felt like it			Everything seemed to be happening at once; or time stopped or lost all meaning	No			No			No			No, it was unpleasant				No			No
10507646198	225134152	2019-02-04 15:34:32	2019-02-04 15:35:33	86.190.250.36					xxxxxxxx	45	Female			Yes		Yes			No				None of the above		No
10507646052	225134152	2019-02-04 15:34:30	2019-02-04 15:36:50	79.190.181.50					xxxxxxxx	29		Male		Yes			No							Yes			Not truly life-threatening, but it felt like it			Everything seemed to be happening at once; or time stopped or lost all meaning		Faster than usual		No			No			No, it was unpleasant				No			No
10507645819	225134152	2019-02-04 15:34:24	2019-02-04 15:35:08	176.24.147.250					xxxxxxxx	28	Female			Yes			No								No
10507643924	225134152	2019-02-04 15:33:22	2019-02-04 15:34:59	5.90.214.245					xxxxxxxx	27		Male			No										No
10507643434	225134152	2019-02-04 15:33:13	2019-02-04 15:33:55	94.27.246.110					xxxxxxxx	23		Male			No										No
10507642574	225134152	2019-02-04 15:32:40	2019-02-04 15:41:55	188.147.97.189					xxxxxxxx	21		Male			No									Yes		Truly life-threatening			Time seemed to go faster or slower than usual		No			No			No				No, it was a neutral			No			No
10507641340	225134152	2019-02-04 15:32:12	2019-02-04 15:33:01	193.136.97.244					xxxxxxxx	27	Female			Yes		Yes			No				None of the above		No
10507640417	225134152	2019-02-04 15:31:36	2019-02-04 15:32:37	46.123.243.141					xxxxxxxx	39	Female			Yes			No								No
10507639912	225134152	2019-02-04 15:31:12	2019-02-04 15:32:23	94.60.80.82					xxxxxxxx	20		Male			No										No
10507639678	225134152	2019-02-04 15:30:52	2019-02-04 15:33:17	5.174.212.13					xxxxxxxx	18		Male			No										No
10507639572	225134152	2019-02-04 15:31:16	2019-02-04 15:32:07	82.17.67.231					xxxxxxxx	37	Female			Yes			No								No
10507639486	225134152	2019-02-04 15:30:50	2019-02-04 15:34:09	72.143.214.213					xxxxxxxx	32		Male		Yes			No								No
10507639323	225134152	2019-02-04 15:30:56	2019-02-04 15:32:47	92.234.205.45					xxxxxxxx	53		Male		Yes		Yes			No				None of the above		No
10507638174	225134152	2019-02-04 15:30:22	2019-02-04 15:31:39	86.169.6.28					xxxxxxxx	38	Female			Yes			No								No
10507637007	225134152	2019-02-04 15:29:45	2019-02-04 15:31:03	86.110.35.149					xxxxxxxx	25		Male		Yes			No								No
10507636005	225134152	2019-02-04 15:29:21	2019-02-04 15:30:36	151.225.138.41					xxxxxxxx	42	Female			Yes		Yes			No				None of the above		No
10507635657	225134152	2019-02-04 15:29:12	2019-02-04 15:30:02	109.69.88.109					xxxxxxxx	23		Male		Yes			No								No
10507634972	225134152	2019-02-04 15:28:51	2019-02-04 15:29:27	137.191.235.4					xxxxxxxx	29		Male			No										No
10507634947	225134152	2019-02-04 15:28:42	2019-02-04 15:29:56	94.61.64.70					xxxxxxxx	21		Male			No										No
10507634655	225134152	2019-02-04 15:28:37	2019-02-04 15:31:32	82.24.19.62					xxxxxxxx	24	Female			Yes		Yes			No				None of the above	Yes		Truly life-threatening				Everything seemed to be happening at once; or time stopped or lost all meaning	No			No			No			No, it was unpleasant				No			No
10507634507	225134152	2019-02-04 15:28:02	2019-02-04 15:29:51	91.104.75.181					xxxxxxxx	35		Male		Yes			No								No
10507633790	225134152	2019-02-04 15:27:54	2019-02-04 15:28:57	82.2.153.196					xxxxxxxx	39	Female			Yes			No								No
10507633779	225134152	2019-02-04 15:28:13	2019-02-04 15:34:57	184.103.138.117					xxxxxxxx	33		Male		Yes			No							Yes		Truly life-threatening			Time seemed to go faster or slower than usual		No			No			No						I felt incredible peace or pleasantness	No				I felt no longer in conflict with nature
10507632438	225134152	2019-02-04 15:27:32	2019-02-04 15:28:50	37.128.9.232					xxxxxxxx	20		Male		Yes			No								No
10507632294	225134152	2019-02-04 15:21:58	2019-02-04 15:31:37	92.239.117.175					xxxxxxxx	37	Female			Yes		Yes		Yes		Numbness or tingling of your body or face				Yes		Truly life-threatening				Everything seemed to be happening at once; or time stopped or lost all meaning		Faster than usual		No			No			No, it was unpleasant				No			No
10507632105	225134152	2019-02-04 15:27:20	2019-02-04 15:28:01	74.76.176.196					xxxxxxxx	24	Female			Yes			No								No
10507632017	225134152	2019-02-04 15:27:10	2019-02-04 15:29:41	137.108.117.65					xxxxxxxx	29		Male		Yes			No							Yes			Not truly life-threatening, but it felt like it			Everything seemed to be happening at once; or time stopped or lost all meaning		Faster than usual		No			No			No, it was unpleasant				No			No
10507631462	225134152	2019-02-04 15:26:59	2019-02-04 15:33:19	86.186.229.48					xxxxxxxx	32	Female			Yes		Yes		Yes		Numbness or tingling of your body or face				Yes		Truly life-threatening			Time seemed to go faster or slower than usual			Faster than usual			I remembered many past events			Everything about myself or others		No, it was unpleasant				No					I felt united or one with the world
10507630825	225134152	2019-02-04 15:26:06	2019-02-04 15:27:17	46.193.2.180					xxxxxxxx	19	Female			Yes			No								No
10507630622	225134152	2019-02-04 15:26:39	2019-02-04 15:41:32	77.102.220.120					xxxxxxxx	22		Male		Yes		Yes		Yes					None of the above	Yes			Not truly life-threatening, but it felt like it		Time seemed to go faster or slower than usual				Incredibly faster		I remembered many past events				Everything about the universe			I felt relief and calmness		No				I felt no longer in conflict with nature
10507630562	225134152	2019-02-04 15:26:31	2019-02-04 15:28:42	37.47.40.125					xxxxxxxx	25		Male		Yes			No								No
10507630219	225134152	2019-02-04 15:26:14	2019-02-04 15:27:23	80.192.128.149					xxxxxxxx	28	Female			Yes			No								No
10507630004	225134152	2019-02-04 15:26:26	2019-02-04 15:27:33	81.145.34.66					xxxxxxxx	29		Male			No									Yes			Not truly life-threatening, but it felt like it			Everything seemed to be happening at once; or time stopped or lost all meaning		Faster than usual		No			No					I felt relief and calmness		No			No
10507629966	225134152	2019-02-04 15:26:21	2019-02-04 15:28:52	86.13.21.48					xxxxxxxx	36	Female			Yes		Yes		Yes					None of the above		No
10507629554	225134152	2019-02-04 15:25:53	2019-02-04 15:27:35	92.21.121.22					xxxxxxxx	23	Female			Yes		Yes			No				None of the above	Yes			Not truly life-threatening, but it felt like it		Time seemed to go faster or slower than usual		No			No			No			No, it was unpleasant				No			No
10507628872	225134152	2019-02-04 15:25:50	2019-02-04 15:27:25	151.52.247.42					xxxxxxxx	20		Male		Yes			No							Yes			Not truly life-threatening, but it felt like it			Everything seemed to be happening at once; or time stopped or lost all meaning		Faster than usual		No			No			No, it was unpleasant				No			No
10507628078	225134152	2019-02-04 15:25:27	2019-02-04 15:26:53	98.176.81.42					xxxxxxxx	26		Male		Yes			No								No
10507627792	225134152	2019-02-04 15:25:17	2019-02-04 15:33:57	79.121.42.20					xxxxxxxx	18		Male			No									Yes		Truly life-threatening			Time seemed to go faster or slower than usual		No			No			No			No, it was unpleasant				No			No
10507626808	225134152	2019-02-04 15:24:42	2019-02-04 15:26:29	86.149.149.58					xxxxxxxx	46		Male		Yes		Yes			No				None of the above		No
10507626622	225134152	2019-02-04 15:24:40	2019-02-04 15:25:43	90.192.169.33					xxxxxxxx	34	Female			Yes		Yes		Yes				Difficulty speaking			No
10507626528	225134152	2019-02-04 15:24:32	2019-02-04 15:27:45	81.130.143.193					xxxxxxxx	29	Female			Yes		Yes		Yes					None of the above	Yes			Not truly life-threatening, but it felt like it			Everything seemed to be happening at once; or time stopped or lost all meaning		Faster than usual		No			No				No, it was a neutral			No			No
10507626399	225134152	2019-02-04 15:24:30	2019-02-04 15:25:18	83.20.108.191					xxxxxxxx	26		Male		Yes			No								No
10507626385	225134152	2019-02-04 15:24:30	2019-02-04 15:25:29	90.240.254.42					xxxxxxxx	25		Male		Yes			No								No
10507625623	225134152	2019-02-04 15:24:08	2019-02-04 15:25:49	82.68.242.102					xxxxxxxx	20	Female				No									Yes			Not truly life-threatening, but it felt like it		Time seemed to go faster or slower than usual		No			No			No			No, it was unpleasant				No			No
10507625537	225134152	2019-02-04 15:23:21	2019-02-04 15:29:25	78.131.92.113					xxxxxxxx	41		Male		Yes		Yes		Yes		Numbness or tingling of your body or face					No
10507625445	225134152	2019-02-04 15:24:04	2019-02-04 15:24:52	212.127.188.173					xxxxxxxx	18	Female			Yes			No								No
10507624864	225134152	2019-02-04 15:23:21	2019-02-04 15:25:11	93.176.128.11					xxxxxxxx	24		Male		Yes			No								No
10507624104	225134152	2019-02-04 15:23:20	2019-02-04 15:24:11	77.100.63.164					xxxxxxxx	29	Female				No										No
10507623914	225134152	2019-02-04 15:22:48	2019-02-04 15:27:49	148.252.128.68					xxxxxxxx	22		Male		Yes			No								No
10507623821	225134152	2019-02-04 15:23:03	2019-02-04 15:24:50	83.22.160.53					xxxxxxxx	29		Male		Yes		Yes			No				None of the above		No
10507623677	225134152	2019-02-04 15:23:01	2019-02-04 15:24:08	82.132.186.105					xxxxxxxx	22		Male			No										No
10507623424	225134152	2019-02-04 15:23:00	2019-02-04 15:23:46	212.140.169.11					xxxxxxxx	34		Male		Yes		Yes			No				None of the above		No
10507622834	225134152	2019-02-04 15:22:12	2019-02-04 15:25:30	213.22.7.17					xxxxxxxx	19	Female			Yes			No							Yes			Not truly life-threatening, but it felt like it		Time seemed to go faster or slower than usual				Incredibly faster	No			No			No, it was unpleasant				No			No
10507621847	225134152	2019-02-04 15:21:18	2019-02-04 15:24:31	81.106.154.206					xxxxxxxx	49	Female			Yes		Yes		Yes					None of the above	Yes			Not truly life-threatening, but it felt like it		Time seemed to go faster or slower than usual				Incredibly faster	No			No			No, it was unpleasant				No			No
10507621650	225134152	2019-02-04 15:21:43	2019-02-04 15:23:17	109.241.133.85					xxxxxxxx	19	Female				No										No
10507621024	225134152	2019-02-04 15:21:41	2019-02-04 15:22:58	134.153.131.164					xxxxxxxx	30	Female			Yes		Yes			No				None of the above		No
10507620754	225134152	2019-02-04 15:21:27	2019-02-04 15:22:55	2.27.175.230					xxxxxxxx	32	Female			Yes		Yes			No				None of the above		No
10507620456	225134152	2019-02-04 15:21:14	2019-02-04 15:22:40	137.175.245.208					xxxxxxxx	57		Male		Yes			No								No
10507620414	225134152	2019-02-04 15:21:20	2019-02-04 15:22:33	81.100.200.42					xxxxxxxx	30	Female			Yes		Yes			No				None of the above		No
10507618608	225134152	2019-02-04 15:19:48	2019-02-04 15:21:51	83.223.225.106					xxxxxxxx	39		Male		Yes			No								No
10507618053	225134152	2019-02-04 15:19:52	2019-02-04 15:21:12	212.219.46.163					xxxxxxxx	48	Female			Yes			No								No
10507617947	225134152	2019-02-04 15:19:42	2019-02-04 15:20:51	90.201.150.154					xxxxxxxx	39	Female				No										No
10507617642	225134152	2019-02-04 15:19:48	2019-02-04 15:20:31	86.156.220.208					xxxxxxxx	35		Male			No										No
10507617407	225134152	2019-02-04 15:19:44	2019-02-04 15:20:53	109.180.82.150					xxxxxxxx	21	Female				No										No
10507617368	225134152	2019-02-04 15:19:26	2019-02-04 15:22:02	213.205.242.193					xxxxxxxx	60	Female			Yes		Yes		Yes		Numbness or tingling of your body or face					No
10507616767	225134152	2019-02-04 15:19:28	2019-02-04 15:20:29	81.154.36.99					xxxxxxxx	27	Female			Yes		Yes		Yes			Weakness of your arm leg, face, or half of your body				No
10507616731	225134152	2019-02-04 15:19:05	2019-02-04 15:23:59	134.184.254.72					xxxxxxxx	19	Female			Yes			No							Yes		Truly life-threatening				Everything seemed to be happening at once; or time stopped or lost all meaning		Faster than usual		No			No			No, it was unpleasant				No			No
10507616480	225134152	2019-02-04 15:19:00	2019-02-04 15:21:57	93.41.1.28					xxxxxxxx	21	Female			Yes			No							Yes			Not truly life-threatening, but it felt like it	No			No			No			No						I felt incredible peace or pleasantness	No			No
10507616453	225134152	2019-02-04 15:19:06	2019-02-04 15:22:18	92.40.249.129					xxxxxxxx	19	Female			Yes		Yes		Yes					None of the above		No
10507614671	225134152	2019-02-04 15:18:11	2019-02-04 15:21:12	87.64.239.240					xxxxxxxx	18		Male		Yes			No							Yes		Truly life-threatening			Time seemed to go faster or slower than usual			Faster than usual		No			No			No, it was unpleasant				No			No
10507613952	225134152	2019-02-04 15:17:55	2019-02-04 15:18:40	86.12.190.242					xxxxxxxx	35	Female			Yes			No								No
10507613528	225134152	2019-02-04 15:17:44	2019-02-04 15:19:25	81.149.223.63					xxxxxxxx	25	Female				No									Yes		Truly life-threatening				Everything seemed to be happening at once; or time stopped or lost all meaning	No			No			No			No, it was unpleasant				No			No
10507611069	225134152	2019-02-04 15:16:06	2019-02-04 15:17:17	89.115.249.50					xxxxxxxx	38		Male		Yes		Yes			No				None of the above		No
10507609004	225134152	2019-02-04 15:15:03	2019-02-04 15:18:02	2.97.70.192					xxxxxxxx	53	Female			Yes		Yes		Yes					None of the above		No
10507608809	225134152	2019-02-04 15:15:09	2019-02-04 15:15:43	176.254.29.40					xxxxxxxx	20	Female				No										No
10507607618	225134152	2019-02-04 15:14:13	2019-02-04 15:15:31	86.4.35.65					xxxxxxxx	57		Male		Yes		Yes			No				None of the above		No
10507607281	225134152	2019-02-04 15:13:51	2019-02-04 15:19:24	86.129.89.187					xxxxxxxx	33		Male			No										No
10507607202	225134152	2019-02-04 15:13:35	2019-02-04 15:21:27	189.223.225.239					xxxxxxxx	33			Other	Yes		Yes		Yes		Numbness or tingling of your body or face				Yes			Not truly life-threatening, but it felt like it	No					Incredibly faster	No					Everything about the universe		No, it was a neutral				Happiness				I felt united or one with the world
10507605079	225134152	2019-02-04 15:13:03	2019-02-04 15:19:15	87.115.236.139					xxxxxxxx	64		Male		Yes			No							Yes		Truly life-threatening			Time seemed to go faster or slower than usual				Incredibly faster	No			No				No, it was a neutral			No			No
10507604481	225134152	2019-02-04 15:12:39	2019-02-04 15:13:53	84.91.249.179					xxxxxxxx	43	Female				No										No
10507604130	225134152	2019-02-04 15:12:37	2019-02-04 15:13:38	37.116.247.190					xxxxxxxx	26		Male			No										No
10507602177	225134152	2019-02-04 15:11:31	2019-02-04 15:12:33	51.9.225.102					xxxxxxxx	25	Female			Yes		Yes		Yes					None of the above		No
10507601978	225134152	2019-02-04 15:11:25	2019-02-04 15:12:10	194.249.228.210					xxxxxxxx	18		Male			No									Yes			Not truly life-threatening, but it felt like it		Time seemed to go faster or slower than usual			Faster than usual				My past flashed before me, out of my control		Everything about myself or others		No, it was unpleasant					Happiness		No
10507601472	225134152	2019-02-04 15:11:02	2019-02-04 15:12:07	86.161.127.135					xxxxxxxx	24		Male		Yes			No								No
10507600851	225134152	2019-02-04 15:10:47	2019-02-04 15:11:36	81.99.244.103					xxxxxxxx	26		Male		Yes			No								No
10507600219	225134152	2019-02-04 15:10:24	2019-02-04 15:11:06	5.66.110.63					xxxxxxxx	27		Male		Yes			No								No
10507600021	225134152	2019-02-04 15:10:18	2019-02-04 15:13:13	2.222.163.243					xxxxxxxx	30	Female			Yes		Yes		Yes			Weakness of your arm leg, face, or half of your body			Yes		Truly life-threatening			Time seemed to go faster or slower than usual				Incredibly faster		I remembered many past events			Everything about myself or others		No, it was unpleasant				No			No
10507598723	225134152	2019-02-04 15:09:33	2019-02-04 15:13:47	172.56.35.223					xxxxxxxx	25	Female			Yes		Yes		Yes				Difficulty speaking		Yes			Not truly life-threatening, but it felt like it			Everything seemed to be happening at once; or time stopped or lost all meaning			Incredibly faster	No			No			No, it was unpleasant				No			No
10507598632	225134152	2019-02-04 15:09:26	2019-02-04 15:11:35	80.235.95.51					xxxxxxxx	18		Male		Yes		Yes		Yes			Weakness of your arm leg, face, or half of your body				No
10507598450	225134152	2019-02-04 15:09:28	2019-02-04 15:12:22	163.173.117.45					xxxxxxxx	23		Male		Yes			No							Yes			Not truly life-threatening, but it felt like it			Everything seemed to be happening at once; or time stopped or lost all meaning			Incredibly faster		I remembered many past events		No			No, it was unpleasant				No			No
10507598088	225134152	2019-02-04 15:09:09	2019-02-04 15:10:29	89.181.175.103					xxxxxxxx	24	Female			Yes		Yes			No				None of the above		No
10507597845	225134152	2019-02-04 15:08:59	2019-02-04 15:09:37	213.126.125.189					xxxxxxxx	18		Male			No										No
10507597799	225134152	2019-02-04 15:09:00	2019-02-04 15:10:09	217.36.124.173					xxxxxxxx	42		Male		Yes		Yes		Yes					None of the above		No
10507597540	225134152	2019-02-04 15:08:42	2019-02-04 15:10:41	93.105.177.54					xxxxxxxx	23		Male			No									Yes		Truly life-threatening		No				Faster than usual				My past flashed before me, out of my control	No				No, it was a neutral			No			No
10507596796	225134152	2019-02-04 15:08:31	2019-02-04 15:09:09	138.253.59.94					xxxxxxxx	26	Female			Yes			No								No
10507596680	225134152	2019-02-04 15:08:28	2019-02-04 15:09:08	69.141.187.50					xxxxxxxx	37		Male		Yes		Yes			No				None of the above		No
10507595103	225134152	2019-02-04 15:07:34	2019-02-04 15:08:44	80.215.164.227					xxxxxxxx	22		Male		Yes		Yes		Yes					None of the above		No
10507594237	225134152	2019-02-04 15:06:44	2019-02-04 15:08:10	152.71.207.143					xxxxxxxx	20	Female				No										No
10507593476	225134152	2019-02-04 15:05:37	2019-02-04 15:07:40	178.43.167.80					xxxxxxxx	20		Male			No										No
10507593162	225134152	2019-02-04 15:06:18	2019-02-04 15:26:42	69.158.171.168					xxxxxxxx	28	Female			Yes			No							Yes		Truly life-threatening				Everything seemed to be happening at once; or time stopped or lost all meaning	No			No				Everything about myself or others		No, it was unpleasant				No			No
10507593058	225134152	2019-02-04 15:06:07	2019-02-04 15:07:58	178.48.139.84					xxxxxxxx	18		Male			No										No
10507592919	225134152	2019-02-04 15:05:50	2019-02-04 15:10:32	123.243.78.187					xxxxxxxx	25	Female			Yes		Yes			No				None of the above	Yes		Truly life-threatening				Everything seemed to be happening at once; or time stopped or lost all meaning	No			No			No				No, it was a neutral			No			No
10507592526	225134152	2019-02-04 15:05:36	2019-02-04 15:06:53	77.99.218.57					xxxxxxxx	27	Female				No										No
10507592403	225134152	2019-02-04 15:05:54	2019-02-04 15:06:36	24.121.163.39					xxxxxxxx	23			Other	Yes			No								No
10507591105	225134152	2019-02-04 15:05:17	2019-02-04 15:05:59	134.3.176.63					xxxxxxxx	53	Female			Yes			No								No
10507590949	225134152	2019-02-04 15:04:58	2019-02-04 15:05:59	107.77.172.56					xxxxxxxx	28	Female			Yes		Yes		Yes					None of the above		No
10507590872	225134152	2019-02-04 15:05:04	2019-02-04 15:06:26	82.128.244.188					xxxxxxxx	24	Female			Yes		Yes			No				None of the above		No
10507589700	225134152	2019-02-04 15:04:19	2019-02-04 15:05:53	217.163.2.86					xxxxxxxx	35	Female			Yes			No								No
10507588643	225134152	2019-02-04 15:03:27	2019-02-04 15:07:07	213.205.194.62					xxxxxxxx	36	Female			Yes		Yes		Yes					None of the above		No
10507587104	225134152	2019-02-04 15:02:14	2019-02-04 15:03:57	94.192.141.235					xxxxxxxx	53	Female			Yes		Yes		Yes		Numbness or tingling of your body or face					No
10507585868	225134152	2019-02-04 15:02:09	2019-02-04 15:05:35	89.67.76.191					xxxxxxxx	20		Male			No									Yes		Truly life-threatening			Time seemed to go faster or slower than usual				Incredibly faster			My past flashed before me, out of my control			Everything about the universe	No, it was unpleasant				No					I felt united or one with the world
10507585640	225134152	2019-02-04 15:00:52	2019-02-04 15:03:04	82.12.99.115					xxxxxxxx	24	Female			Yes		Yes			No				None of the above		No
10507585507	225134152	2019-02-04 15:01:41	2019-02-04 15:02:59	92.16.242.87					xxxxxxxx	39	Female			Yes		Yes		Yes				Difficulty speaking			No
10507584342	225134152	2019-02-04 15:01:08	2019-02-04 15:12:20	188.29.165.139					xxxxxxxx	23		Male			No										No
10507580842	225134152	2019-02-04 14:58:46	2019-02-04 15:27:35	193.51.83.101					xxxxxxxx	27	Female				No									Yes		Truly life-threatening			Time seemed to go faster or slower than usual		No					My past flashed before me, out of my control			Everything about the universe			I felt relief and calmness		No				I felt no longer in conflict with nature
10507580115	225134152	2019-02-04 14:58:04	2019-02-04 14:59:28	62.28.103.82					xxxxxxxx	45	Female			Yes			No								No
10507579734	225134152	2019-02-04 14:57:55	2019-02-04 15:02:57	81.100.143.184					xxxxxxxx	59		Male			No									Yes		Truly life-threatening			Time seemed to go faster or slower than usual			Faster than usual				My past flashed before me, out of my control		Everything about myself or others		No, it was unpleasant				No			No
10507578553	225134152	2019-02-04 14:57:27	2019-02-04 15:01:51	85.255.233.2					xxxxxxxx	33		Male			No									Yes			Not truly life-threatening, but it felt like it			Everything seemed to be happening at once; or time stopped or lost all meaning	No			No			No			No, it was unpleasant				No			No
10507576063	225134152	2019-02-04 14:56:02	2019-02-04 14:57:33	175.223.39.203					xxxxxxxx	27		Male			No										No
10507575895	225134152	2019-02-04 14:55:52	2019-02-04 14:57:22	151.226.176.139					xxxxxxxx	36	Female			Yes		Yes		Yes		Numbness or tingling of your body or face					No
10507574715	225134152	2019-02-04 14:54:17	2019-02-04 14:56:59	109.152.38.247					xxxxxxxx	38	Female			Yes		Yes		Yes					None of the above		No
10507574166	225134152	2019-02-04 14:55:06	2019-02-04 14:56:24	80.229.29.154					xxxxxxxx	43		Male		Yes		Yes		Yes					None of the above		No
10507573942	225134152	2019-02-04 14:54:44	2019-02-04 15:00:12	84.237.151.26					xxxxxxxx	20	Female			Yes		Yes		Yes		Numbness or tingling of your body or face				Yes			Not truly life-threatening, but it felt like it			Everything seemed to be happening at once; or time stopped or lost all meaning		Faster than usual			I remembered many past events			Everything about myself or others		No, it was unpleasant				No			No
10507572963	225134152	2019-02-04 14:54:23	2019-02-04 14:58:52	80.195.213.181					xxxxxxxx	27		Male		Yes		Yes		Yes		Numbness or tingling of your body or face				Yes		Truly life-threatening				Everything seemed to be happening at once; or time stopped or lost all meaning	No			No			No			No, it was unpleasant				No			No
10507572936	225134152	2019-02-04 14:54:12	2019-02-04 15:01:29	178.212.221.86					xxxxxxxx	18	Female			Yes			No							Yes			Not truly life-threatening, but it felt like it	No			No				I remembered many past events			Everything about myself or others			No, it was a neutral			No			No
10507572157	225134152	2019-02-04 14:53:11	2019-02-04 14:57:53	86.181.188.233					xxxxxxxx	24	Female				No									Yes			Not truly life-threatening, but it felt like it		Time seemed to go faster or slower than usual			Faster than usual		No				Everything about myself or others			No, it was a neutral				Happiness		No
10507571274	225134152	2019-02-04 14:52:57	2019-02-04 14:55:55	109.144.213.213					xxxxxxxx	28	Female			Yes			No								No
10507571003	225134152	2019-02-04 14:53:07	2019-02-04 14:55:46	176.26.76.127					xxxxxxxx	21		Male		Yes		Yes			No				None of the above	Yes			Not truly life-threatening, but it felt like it			Everything seemed to be happening at once; or time stopped or lost all meaning		Faster than usual			I remembered many past events		No				No, it was a neutral			No			No
10507569889	225134152	2019-02-04 14:52:24	2019-02-04 14:53:32	86.174.23.191					xxxxxxxx	51	Female			Yes		Yes			No				None of the above		No
10507569669	225134152	2019-02-04 14:51:59	2019-02-04 14:54:55	42.113.198.254					xxxxxxxx	24	Female			Yes		Yes			No				None of the above	Yes		Truly life-threatening			Time seemed to go faster or slower than usual		No			No			No			No, it was unpleasant				No			No
10507569264	225134152	2019-02-04 14:51:59	2019-02-04 14:52:47	5.148.153.2					xxxxxxxx	33	Female			Yes		Yes		Yes					None of the above		No
10507569204	225134152	2019-02-04 14:52:04	2019-02-04 14:52:42	5.151.62.193					xxxxxxxx	42	Female			Yes		Yes		Yes					None of the above		No
10507569170	225134152	2019-02-04 14:50:58	2019-02-04 14:53:26	92.16.246.48					xxxxxxxx	26	Female			Yes		Yes		Yes					None of the above		No
10507568040	225134152	2019-02-04 14:51:19	2019-02-04 14:55:53	80.1.220.230					xxxxxxxx	42	Female				No									Yes		Truly life-threatening				Everything seemed to be happening at once; or time stopped or lost all meaning			Incredibly faster	No			No			No, it was unpleasant				No			No
10507566613	225134152	2019-02-04 14:50:22	2019-02-04 14:51:41	82.1.19.81					xxxxxxxx	18		Male		Yes		Yes		Yes					None of the above		No
10507566562	225134152	2019-02-04 14:50:21	2019-02-04 14:52:22	213.205.241.164					xxxxxxxx	26		Male		Yes			No							Yes			Not truly life-threatening, but it felt like it			Everything seemed to be happening at once; or time stopped or lost all meaning		Faster than usual		No			No			No, it was unpleasant				No			No
10507565752	225134152	2019-02-04 14:50:02	2019-02-04 14:51:16	151.28.177.11					xxxxxxxx	30		Male		Yes			No								No
10507564815	225134152	2019-02-04 14:49:23	2019-02-04 14:50:19	77.160.26.47					xxxxxxxx	19	Female			Yes			No								No
10507564317	225134152	2019-02-04 14:49:17	2019-02-04 14:49:51	5.64.31.123					xxxxxxxx	25		Male		Yes			No								No
10507564306	225134152	2019-02-04 14:48:41	2019-02-04 14:49:51	144.173.23.125					xxxxxxxx	21	Female			Yes			No								No
10507564203	225134152	2019-02-04 14:49:07	2019-02-04 14:50:32	82.30.119.104					xxxxxxxx	29	Female			Yes		Yes		Yes					None of the above		No
10507564021	225134152	2019-02-04 14:48:59	2019-02-04 14:50:40	80.242.183.202					xxxxxxxx	32	Female			Yes		Yes		Yes		Numbness or tingling of your body or face					No
10507563103	225134152	2019-02-04 14:47:01	2019-02-04 14:50:13	51.6.58.143					xxxxxxxx	68	Female			Yes		Yes		Yes					None of the above		No
10507562918	225134152	2019-02-04 14:48:16	2019-02-04 14:48:56	51.6.31.67					xxxxxxxx	22		Male		Yes			No								No
10507561582	225134152	2019-02-04 14:47:21	2019-02-04 14:54:49	80.103.207.196					xxxxxxxx	23		Male		Yes			No							Yes		Truly life-threatening			Time seemed to go faster or slower than usual				Incredibly faster	No			No					I felt relief and calmness		No			No
10507560751	225134152	2019-02-04 14:45:57	2019-02-04 14:47:46	79.74.135.6					xxxxxxxx	42	Female			Yes			No								No
10507555453	225134152	2019-02-04 14:43:19	2019-02-04 14:50:23	82.155.209.179					xxxxxxxx	21	Female			Yes			No							Yes		Truly life-threatening				Everything seemed to be happening at once; or time stopped or lost all meaning	No			No			No			No, it was unpleasant				No			No
10507555171	225134152	2019-02-04 14:43:16	2019-02-04 14:43:51	82.72.39.141					xxxxxxxx	24		Male		Yes		Yes			No		Weakness of your arm leg, face, or half of your body				No
10507554572	225134152	2019-02-04 14:42:52	2019-02-04 14:44:37	5.170.73.126					xxxxxxxx	23		Male		Yes			No								No
10507550643	225134152	2019-02-04 14:40:05	2019-02-04 14:45:25	70.125.234.91					xxxxxxxx	36	Female			Yes		Yes		Yes					None of the above	Yes			Not truly life-threatening, but it felt like it			Everything seemed to be happening at once; or time stopped or lost all meaning			Incredibly faster			My past flashed before me, out of my control	No			No, it was unpleasant				No				I felt no longer in conflict with nature
10507549908	225134152	2019-02-04 14:39:58	2019-02-04 14:41:04	77.124.41.193					xxxxxxxx	33		Male		Yes			No								No
10507545830	225134152	2019-02-04 14:37:22	2019-02-04 14:38:07	86.180.92.59					xxxxxxxx	40	Female				No										No
10507545697	225134152	2019-02-04 14:37:10	2019-02-04 14:43:26	83.4.204.80					xxxxxxxx	29	Female				No									Yes		Truly life-threatening				Everything seemed to be happening at once; or time stopped or lost all meaning		Faster than usual		No			No			No, it was unpleasant				No			No
10507544753	225134152	2019-02-04 14:36:32	2019-02-04 14:38:24	109.152.135.254					xxxxxxxx	21	Female			Yes			No								No
10507543855	225134152	2019-02-04 14:36:01	2019-02-04 14:37:17	94.2.207.81					xxxxxxxx	22	Female			Yes		Yes			No				None of the above		No
10507543598	225134152	2019-02-04 14:35:50	2019-02-04 14:41:11	193.4.244.7					xxxxxxxx	33		Male		Yes			No								No
10507543348	225134152	2019-02-04 14:35:30	2019-02-04 14:36:40	37.47.40.174					xxxxxxxx	26		Male			No										No
10507542508	225134152	2019-02-04 14:35:15	2019-02-04 14:39:50	86.131.94.100					xxxxxxxx	27	Female			Yes			No							Yes			Not truly life-threatening, but it felt like it			Everything seemed to be happening at once; or time stopped or lost all meaning	No			No			No			No, it was unpleasant				No			No
10507542466	225134152	2019-02-04 14:35:03	2019-02-04 14:36:33	213.205.192.186					xxxxxxxx	30	Female			Yes		Yes		Yes					None of the above		No
10507542115	225134152	2019-02-04 14:34:12	2019-02-04 14:39:07	217.42.211.187					xxxxxxxx	28	Female			Yes		Yes		Yes		Numbness or tingling of your body or face					No
[truncated: 28 more columns]
